# Supplementary material for: A phosphine-free Mn(i)-NNS catalyst for asymmetric transfer hydrogenation of acetophenone: a theoretical prediction
Source: Royal Society of Chemistry journal article supplement (doi:10.1039/d1dt02410h), 2021-01-01
Supplement: d1dt02410h1.pdf [file d1dt02410h1.pdf]

## Supporting Information

For

### **A Phosphine-Free Mn(I)-NNS Catalyst For Asymmetric Transfer**

### **Hydrogenation of Acetophenone: A Theoretical Prediction**

*Yaqi Zhao, Lin Zhang, Min Pu\*, Ming Lei\**

State Key Laboratory of Chemical Resource Engineering, Institute of Computational Chemistry, College of Chemistry, Beijing University of Chemical Technology, Beijing, 100029, China

\*Email: [leim@mail.buct.edu.cn](mailto:leim@mail.buct.edu.cn) (Ming Lei), [pumin@mail.buct.edu.cn](mailto:pumin@mail.buct.edu.cn) (Min Pu)

### **Content**

|                                                                                              |           |
|----------------------------------------------------------------------------------------------|-----------|
| <b>1. Acetophenone hydrogenation catalyzed by complex B1.....</b>                            | <b>2</b>  |
| <b>2. Interaction between frontier molecular orbitals (FMOs) of acetophenone and A6.....</b> | <b>2</b>  |
| <b>3. Key bond length and APT charge.....</b>                                                | <b>3</b>  |
| <b>4. The theoretical ee value is calculated with the following formulas.....</b>            | <b>4</b>  |
| <b>5. Key geometry structures.....</b>                                                       | <b>5</b>  |
| <b>6. Energies of all the structures.....</b>                                                | <b>6</b>  |
| <b>7. Imaginary frequencies of transition states.....</b>                                    | <b>9</b>  |
| <b>8. Cartesian coordinates of all the structures.....</b>                                   | <b>11</b> |

## 1. Acetophenone hydrogenation catalyzed by complex B1

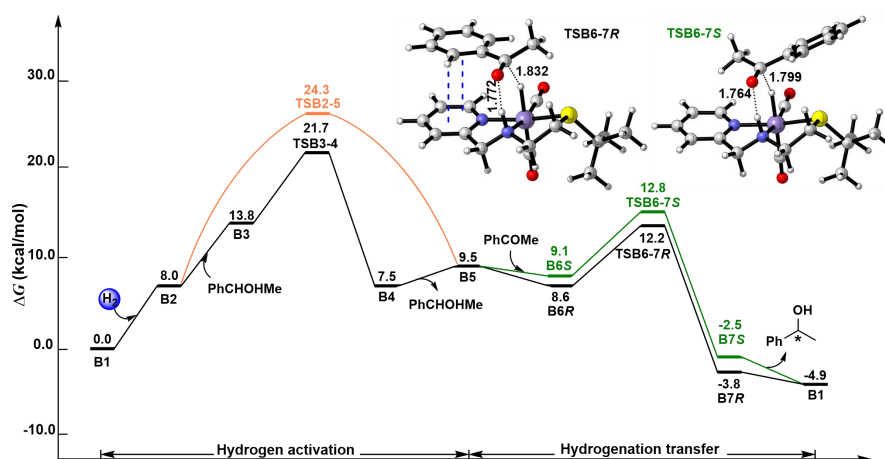

**Figure S1.** The Gibbs free energy profiles of H<sub>2</sub>-hydrogenation of acetophenone catalyzed by complex **B1** (unit: kcal/mol). Key bond lengths are given in Å. (Purple: Mn, blue: N, yellow: S, gray: C, red: O, other: H)

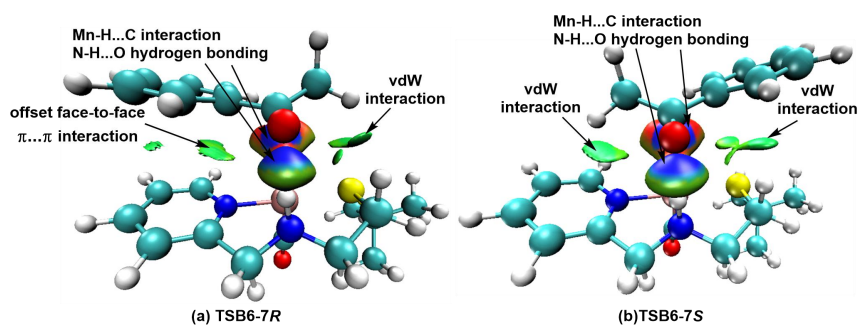

**Figure S2.** NCI analysis of the transition states of HT using RDG method. (Pink: Mn, blue: N, yellow: S, light blue: C, red: O, other: H)

## 2. Interaction between frontier molecular orbitals (FMOs) of acetophenone and

A6.

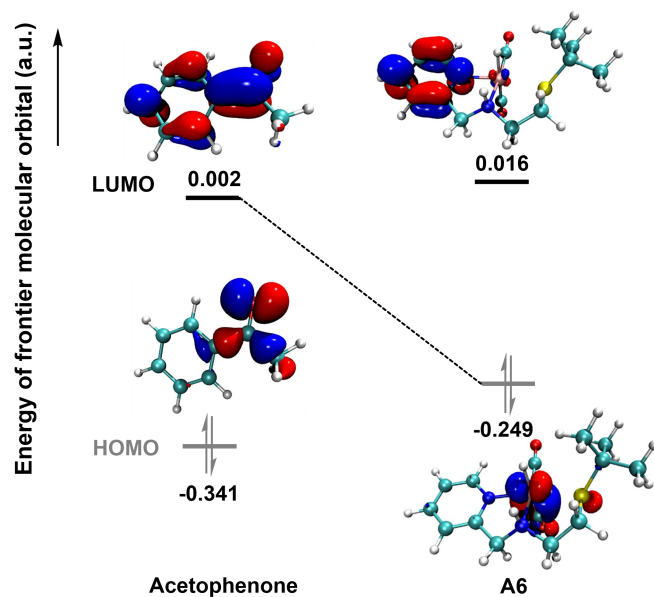

**Figure S3.** Interaction between frontier molecular orbitals (FMOs) of acetophenone and **A6**.

The calculated results about the interaction of the frontier molecular orbitals (FMOs) between acetophenone and **A6** show that the energy gap between the LUMO of acetophenone and the HOMO of **A6** is 0.251 a.u., while that between the HOMO of acetophenone and LUMO of **A6** is 0.357 a.u.. It also proves that the hydride transfer is prior to proton transfer in the HT step, which is consistent with our previous work (DOI: 10.1039/b815699a).

### 3. Key bond length and APT charge

We found that there are no good linear relationships between the energy barriers of the hydrogen transfer steps (HT) and Mn–H bond lengths, H<sup>2</sup> charges and Mn charges etc. in transition states **TSA7-8R** and **TSA7-8S**. However, if we didn't consider the solvent effect (optimization without solvent), the relationship between the energy

barrier of HT step from **A6** with different X ligands (X = CO, Cl, H, OMe, NCMe, CCMe, OPh, NCHMe, CHCHMe) to **TSA7-8** and the Mn–H bond lengths of **A6**, the hydride move distances (HMDs) were found (see Figure S4). A longer bond length of Mn–H leads to a lower HT energy barrier, and a shorter HMD leads to a lower HT energy barrier.

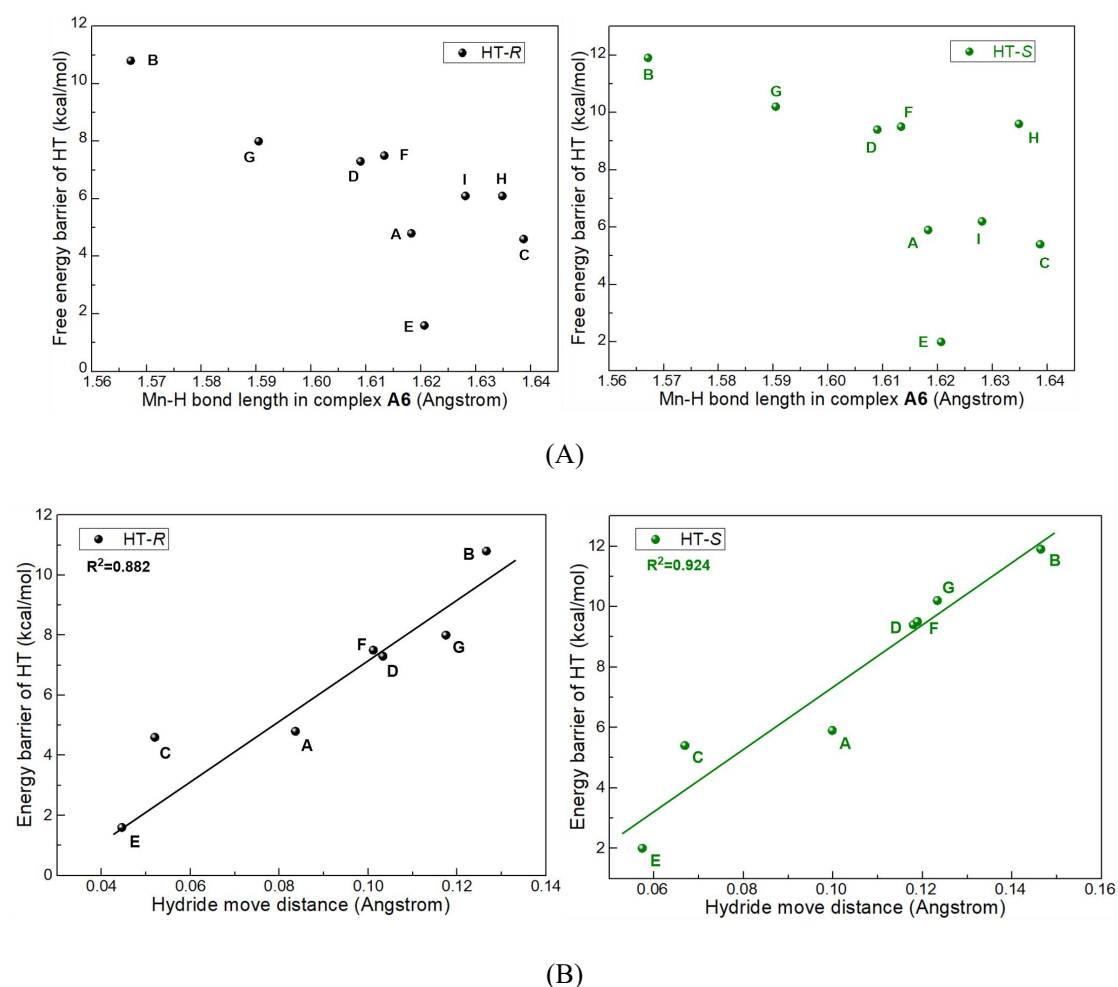

**Figure S4.** The correlation between the HT energy barrier and (A) the Mn–H bond length in complex **A6**, (B) the hydride move distance (HMD) at  $\omega$ B97X-D/BSI level (BSI denotes the LANL2DZ basis set for Mn center and the 6-31++G (d, p) basis set for all other atoms).

#### 4. The theoretical ee value is calculated with the following formulas

$$ee = \frac{R-S}{R+S} \quad (1)$$

$$ee = \frac{e^{\Delta\Delta G/RT} - 1}{e^{\Delta\Delta G/RT} + 1} \quad (2)$$

## 5. Key geometry structures

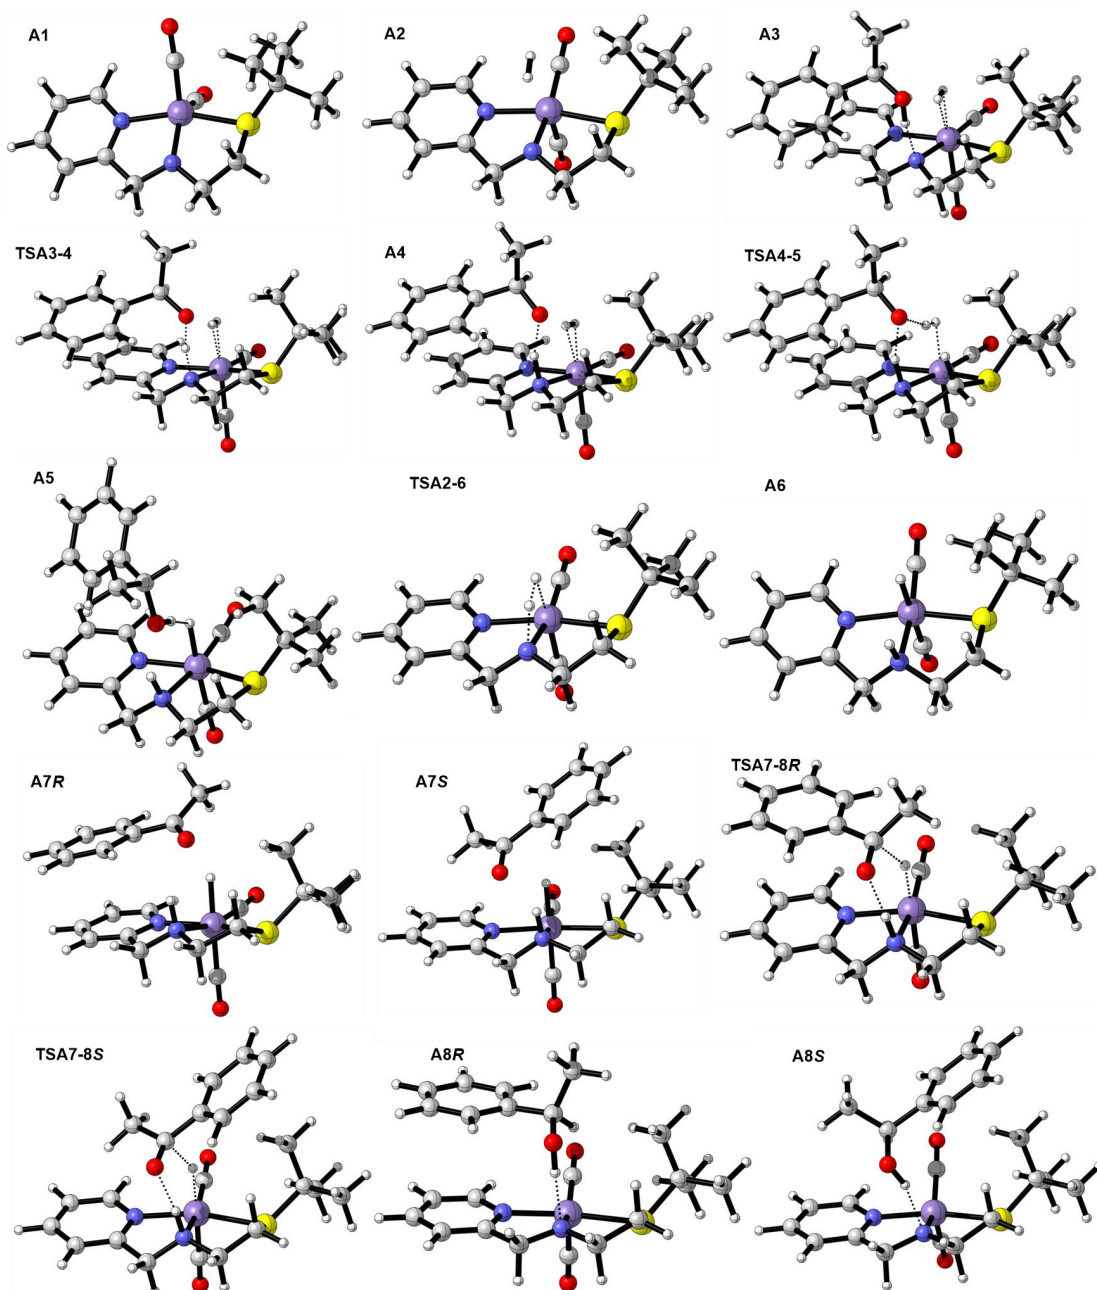

## 6. Energies of all the structures

**Table S1.** The calculated absolute electronic energies ( $E$ , in a.u.), thermal free energies ( $G$ , in a.u.), and relative Gibbs energies ( $\Delta G$ , in kcal/mol) (Calculated at 298.15 K and 1 atm).

| Complex                       | $E$            | $G$          | $\Delta G$ |
|-------------------------------|----------------|--------------|------------|
| <b>A1<sub>X=CO</sub></b>      | -1306.81835574 | -1306.538048 | 0.0        |
| <b>H<sub>2</sub></b>          | -1.17454544    | -1.162403    | /          |
| <b>PhCOMe</b>                 | -384.80362867  | -384.684375  | /          |
| <b>A2<sub>X=CO</sub></b>      | -1307.99585861 | -1307.706098 | -3.5       |
| <b>A3<sub>X=CO</sub></b>      | -1694.0200745  | -1693.572608 | -3.5       |
| <b>TSA3-4<sub>X=CO</sub></b>  | -1694.01735631 | -1693.570493 | -2.2       |
| <b>A4<sub>X=CO</sub></b>      | -1694.02057026 | -1693.568019 | -0.6       |
| <b>TSA4-5<sub>X=CO</sub></b>  | -1694.02050611 | -1693.566774 | 0.2        |
| <b>A5<sub>X=CO</sub></b>      | -1694.03953795 | -1693.587623 | -12.9      |
| <b>TSA2-6<sub>X=CO</sub></b>  | -1307.97443915 | -1307.678177 | 14.0       |
| <b>A6<sub>X=CO</sub></b>      | -1308.01587571 | -1307.7149   | -9.1       |
| <b>A7<sub>RX=CO</sub></b>     | -1692.83119537 | -1692.399632 | -9.3       |
| <b>A7<sub>SX=CO</sub></b>     | -1692.83154333 | -1692.400565 | -9.9       |
| <b>TSA7-8<sub>RX=CO</sub></b> | -1692.8202112  | -1692.388684 | -2.4       |
| <b>TSA7-8<sub>SX=CO</sub></b> | -1692.81901615 | -1692.38722  | -1.5       |
| <b>A8<sub>RX=CO</sub></b>     | -1692.84999069 | -1692.415404 | -19.2      |
| <b>A8<sub>SX=CO</sub></b>     | -1692.84642212 | -1692.412511 | -17.4      |
| <b>R-PhCHOHMe</b>             | -386.00963145  | -385.866615  | /          |
| <b>S-PhCHOHMe</b>             | -386.00963145  | -385.866615  | /          |
| <b>A1<sub>X=Cl</sub></b>      | -1653.835864   | -1653.566141 | 0.0        |
| <b>A2<sub>X=Cl</sub></b>      | -1655.010604   | -1654.723048 | 3.4        |
| <b>TSA2-6<sub>X=Cl</sub></b>  | -1654.999039   | -1654.713551 | 9.4        |
| <b>A6<sub>X=Cl</sub></b>      | -1655.035182   | -1654.743521 | -9.4       |

|                                  |              |              |       |
|----------------------------------|--------------|--------------|-------|
| <b>A7R<sub>X=Cl</sub></b>        | -2039.847045 | -2039.426333 | -8.4  |
| <b>A7S<sub>X=Cl</sub></b>        | -2039.848247 | -2039.42681  | -8.7  |
| <b>TSA7-8R<sub>X=Cl</sub></b>    | -2039.840207 | -2039.419173 | -3.9  |
| <b>TSA7-8S<sub>X=Cl</sub></b>    | -2039.839572 | -2039.41748  | -2.9  |
| <b>A8R<sub>X=Cl</sub></b>        | -2039.868251 | -2039.445642 | -20.5 |
| <b>A8S<sub>X=Cl</sub></b>        | -2039.865821 | -2039.443099 | -18.9 |
| <b>A1<sub>X=H</sub></b>          | -1194.162353 | -1193.884274 | 0.0   |
| <b>A2<sub>X=H</sub></b>          | -1195.335622 | -1195.04063  | 3.8   |
| <b>TSA2-6<sub>X=H</sub></b>      | -1195.321833 | -1195.028916 | 11.1  |
| <b>A6<sub>X=H</sub></b>          | -1195.355432 | -1195.055844 | -5.8  |
| <b>A7R<sub>X=H</sub></b>         | -1580.166718 | -1579.737668 | -4.2  |
| <b>A7S<sub>X=H</sub></b>         | -1580.167702 | -1579.739084 | -5.0  |
| <b>TSA7-8R<sub>X=H</sub></b>     | -1580.160423 | -1579.729812 | 0.8   |
| <b>TSA7-8S<sub>X=H</sub></b>     | -1580.160143 | -1579.727007 | 2.5   |
| <b>A8R<sub>X=H</sub></b>         | -1580.196181 | -1579.76296  | -20.0 |
| <b>A8S<sub>X=H</sub></b>         | -1580.193742 | -1579.761702 | -19.2 |
| <b>A1<sub>X=OMe</sub></b>        | -1308.679725 | -1308.372322 | 0.0   |
| <b>A2<sub>X=OMe</sub></b>        | -1309.856051 | -1309.531049 | 2.3   |
| <b>TSA2-6<sub>X=OMe</sub></b>    | -1309.843197 | -1309.51878  | 10.0  |
| <b>A6<sub>X=OMe</sub></b>        | -1309.880415 | -1309.550153 | -9.7  |
| <b>A7R<sub>X=OMe</sub></b>       | -1694.691344 | -1694.232058 | -8.1  |
| <b>A7S<sub>X=OMe</sub></b>       | -1694.691945 | -1694.232786 | -8.6  |
| <b>TSA7-8R<sub>X=OMe</sub></b>   | -1694.684796 | -1694.22279  | -2.3  |
| <b>TSA7-8S<sub>X=OMe</sub></b>   | -1694.68424  | -1694.223293 | -2.6  |
| <b>A8R<sub>X=OMe</sub></b>       | -1694.714487 | -1694.251265 | -20.2 |
| <b>A8S<sub>X=OMe</sub></b>       | -1694.711262 | -1694.251663 | -20.4 |
| <b>A1<sub>X=CHCHMe</sub></b>     | -1310.840043 | -1310.505301 | 0.0   |
| <b>A2<sub>X=CHCHMe</sub></b>     | -1312.014082 | -1311.662444 | 3.3   |
| <b>TSA2-6<sub>X=CHCHMe</sub></b> | -1312.000219 | -1311.648786 | 11.9  |

---

|                                   |              |              |       |
|-----------------------------------|--------------|--------------|-------|
| <b>A6<sub>X</sub>=CHCHMe</b>      | -1312.042219 | -1311.650786 | -4.2  |
| <b>A7R<sub>X</sub>=CHCHMe</b>     | -1696.843356 | -1696.357301 | -3.3  |
| <b>A7S<sub>X</sub>=CHCHMe</b>     | -1696.844347 | -1696.357984 | -3.7  |
| <b>TSA7-8R<sub>X</sub>=CHCHMe</b> | -1696.837863 | -1696.350006 | 1.3   |
| <b>TSA7-8S<sub>X</sub>=CHCHMe</b> | -1696.837196 | -1696.348706 | 2.1   |
| <b>A8R<sub>X</sub>=CHCHMe</b>     | -1696.874972 | -1696.385845 | -21.2 |
| <b>A8S<sub>X</sub>=CHCHMe</b>     | -1696.873362 | -1696.385727 | -21.1 |
| <b>A1<sub>X</sub>=NCMe</b>        | -1326.223192 | -1325.907409 | 0.0   |
| <b>A2<sub>X</sub>=NCMe</b>        | -1327.399265 | -1327.067352 | 1.5   |
| <b>TSA2-6<sub>X</sub>=NCMe</b>    | -1327.386877 | -1327.056333 | 8.5   |
| <b>A6<sub>X</sub>=NCMe</b>        | -1327.42242  | -1327.085404 | -9.8  |
| <b>A7R<sub>X</sub>=NCMe</b>       | -1712.235581 | -1711.76865  | -9.1  |
| <b>A7S<sub>X</sub>=NCMe</b>       | -1712.23652  | -1711.770403 | -10.2 |
| <b>TSA7-8R<sub>X</sub>=NCMe</b>   | -1712.228367 | -1711.760831 | -4.2  |
| <b>TSA7-8S<sub>X</sub>=NCMe</b>   | -1712.226913 | -1711.759485 | -3.3  |
| <b>A8R<sub>X</sub>=NCMe</b>       | -1712.256541 | -1711.78756  | -20.9 |
| <b>A8S<sub>X</sub>=NCMe</b>       | -1712.253447 | -1711.784826 | -19.2 |
| <b>A1<sub>X</sub>=CCMe</b>        | -1309.624582 | -1309.311039 | 0.0   |
| <b>A2<sub>X</sub>=CCMe</b>        | -1310.802875 | -1310.476517 | -1.9  |
| <b>TSA2-6<sub>X</sub>=CCMe</b>    | -1310.784956 | -1310.457656 | 9.9   |
| <b>A6<sub>X</sub>=CCMe</b>        | -1310.818075 | -1310.483022 | -6.0  |
| <b>A7R<sub>X</sub>=CCMe</b>       | -1695.629266 | -1695.166029 | -5.2  |
| <b>A7S<sub>X</sub>=CCMe</b>       | -1695.630512 | -1695.164648 | -4.3  |
| <b>TSA7-8R<sub>X</sub>=CCMe</b>   | -1695.623637 | -1695.156855 | 0.6   |
| <b>TSA7-8S<sub>X</sub>=CCMe</b>   | -1695.622672 | -1695.156789 | 0.7   |
| <b>A8R<sub>X</sub>=CCMe</b>       | -1695.658446 | -1695.188942 | -19.5 |
| <b>A8S<sub>X</sub>=CCMe</b>       | -1695.654356 | -1695.186242 | -18.7 |

---



## 7. Imaginary frequencies of transition states

**Table S2.** Calculated imaginary frequencies of transition states at  $\omega$  B97X-D/BSI (LANL2DZ & 6-31++G\*\*) level.

|                                              |                  |
|----------------------------------------------|------------------|
| <b>TSA2-6<sub>X=CO</sub></b>                 | 1244.29 <i>i</i> |
| <b>TSA3-4<sub>X=CO</sub></b>                 | 1006.91 <i>i</i> |
| <b>TSA4-5<sub>X=CO</sub></b>                 | 176.74 <i>i</i>  |
| <b>TSA7-8<sub>R<sub>X=CO</sub></sub></b>     | 583.04 <i>i</i>  |
| <b>TSA7-8<sub>S<sub>X=CO</sub></sub></b>     | 644.34 <i>i</i>  |
| <b>TSA2-6<sub>X=Cl</sub></b>                 | 1122.78 <i>i</i> |
| <b>TSA3-4<sub>X=Cl</sub></b>                 | 686.20 <i>i</i>  |
| <b>TSA4-5<sub>X=Cl</sub></b>                 | 744.68 <i>i</i>  |
| <b>TSA7-8<sub>R<sub>X=Cl</sub></sub></b>     | 480.09 <i>i</i>  |
| <b>TSA7-8<sub>S<sub>X=Cl</sub></sub></b>     | 459.90 <i>i</i>  |
| <b>TSA2-6<sub>X=H</sub></b>                  | 1287.12 <i>i</i> |
| <b>TSA3-4<sub>X=H</sub></b>                  | 571.31 <i>i</i>  |
| <b>TSA4-5<sub>X=H</sub></b>                  | 845.56 <i>i</i>  |
| <b>TSA7-8<sub>R<sub>X=H</sub></sub></b>      | 465.53 <i>i</i>  |
| <b>TSA7-8<sub>S<sub>X=H</sub></sub></b>      | 390.91 <i>i</i>  |
| <b>TSA2-6<sub>X=OMe</sub></b>                | 1194.24 <i>i</i> |
| <b>TSA3-4<sub>X=OMe</sub></b>                | 678.52 <i>i</i>  |
| <b>TSA4-5<sub>X=OMe</sub></b>                | 810.99 <i>i</i>  |
| <b>TSA7-8<sub>R<sub>X=OMe</sub></sub></b>    | 429.39 <i>i</i>  |
| <b>TSA7-8<sub>S<sub>X=OMe</sub></sub></b>    | 296.52 <i>i</i>  |
| <b>TSA2-6<sub>X=CHCHMe</sub></b>             | 1251.36 <i>i</i> |
| <b>TSA3-4<sub>X=CHCHMe</sub></b>             | 332.69 <i>i</i>  |
| <b>TSA4-5<sub>X=CHCHMe</sub></b>             | 860.38 <i>i</i>  |
| <b>TSA7-8<sub>R<sub>X=CHCHMe</sub></sub></b> | 390.08 <i>i</i>  |
| <b>TSA7-8<sub>S<sub>X=CHCHMe</sub></sub></b> | 412.43 <i>i</i>  |

|                                 |                  |
|---------------------------------|------------------|
| <b>TSA2-6<sub>X=NCMe</sub></b>  | 1243.33 <i>i</i> |
| <b>TSA3-4<sub>X=NCMe</sub></b>  | 969.71 <i>i</i>  |
| <b>TSA4-5<sub>X=NCMe</sub></b>  | 697.74 <i>i</i>  |
| <b>TSA7-8<sub>RX=NCMe</sub></b> | 499.57 <i>i</i>  |
| <b>TSA7-8<sub>SX=NCMe</sub></b> | 546.15 <i>i</i>  |
| <b>TSA2-6<sub>X=CCMe</sub></b>  | 1199.83 <i>i</i> |
| <b>TSA3-4<sub>X=CCMe</sub></b>  | 437.70 <i>i</i>  |
| <b>TSA4-5<sub>X=CCMe</sub></b>  | 836.90 <i>i</i>  |
| <b>TSA7-8<sub>RX=CCMe</sub></b> | 339.95 <i>i</i>  |
| <b>TSA7-8<sub>SX=CCMe</sub></b> | 375.70 <i>i</i>  |

---

## 8. Cartesian coordinates of all the structures

**Table S3.** Atomic cartesian coordinates of intermediates and transition states

(presented in Å).

**A1**<sub>x=co</sub>

| -----                   |              |              |              |
|-------------------------|--------------|--------------|--------------|
| Coordinates (Angstroms) |              |              |              |
|                         | X            | Y            | Z            |
| -----                   |              |              |              |
| 25                      | -0.204562000 | -0.196964000 | 0.164364000  |
| 7                       | -0.517282000 | 1.636078000  | 0.065221000  |
| 6                       | 0.070850000  | -1.542470000 | -0.952804000 |
| 8                       | 0.178601000  | -2.412830000 | -1.722331000 |
| 6                       | 1.839619000  | 2.187804000  | -0.130894000 |
| 6                       | -1.869775000 | 2.134949000  | 0.003738000  |
| 6                       | 0.457534000  | 2.698336000  | 0.246946000  |
| 1                       | 2.631683000  | 2.846927000  | 0.231876000  |
| 1                       | 1.915301000  | 2.084486000  | -1.215835000 |
| 1                       | 0.224830000  | 3.566455000  | -0.389197000 |
| 1                       | 0.459451000  | 3.061375000  | 1.288725000  |
| 1                       | -2.018474000 | 2.824801000  | -0.844115000 |
| 1                       | -2.139280000 | 2.707374000  | 0.909027000  |
| 6                       | -2.813393000 | 0.980472000  | -0.124712000 |
| 6                       | -4.191032000 | 1.133033000  | -0.285496000 |
| 1                       | -4.615045000 | 2.130757000  | -0.335350000 |
| 6                       | -3.018076000 | -1.326618000 | -0.145675000 |
| 1                       | -2.512321000 | -2.283674000 | -0.078529000 |
| 6                       | -4.991521000 | 0.004626000  | -0.377455000 |
| 1                       | -6.065139000 | 0.099757000  | -0.505191000 |
| 6                       | -4.391077000 | -1.253358000 | -0.302732000 |
| 1                       | -4.974208000 | -2.165207000 | -0.365521000 |
| 7                       | -2.235964000 | -0.232730000 | -0.062287000 |
| 16                      | 1.995013000  | 0.535309000  | 0.619771000  |
| 6                       | 3.425923000  | -0.247177000 | -0.277188000 |
| 6                       | 3.505870000  | -1.671782000 | 0.278525000  |
| 6                       | 4.693356000  | 0.534733000  | 0.077682000  |
| 1                       | 2.604545000  | -2.247848000 | 0.048751000  |
| 1                       | 4.361299000  | -2.183664000 | -0.175735000 |
| 1                       | 3.650128000  | -1.672266000 | 1.364241000  |
| 1                       | 4.646948000  | 1.565272000  | -0.288877000 |
| 1                       | 4.862687000  | 0.555871000  | 1.158874000  |
| 1                       | 5.557282000  | 0.052719000  | -0.394332000 |
| 6                       | 3.219686000  | -0.267051000 | -1.790673000 |

|   |              |              |              |
|---|--------------|--------------|--------------|
| 1 | 4.035396000  | -0.837601000 | -2.249707000 |
| 1 | 2.275667000  | -0.741267000 | -2.067779000 |
| 1 | 3.242834000  | 0.737756000  | -2.221765000 |
| 6 | -0.192234000 | -1.334953000 | 1.515890000  |
| 8 | -0.197526000 | -2.055866000 | 2.431524000  |

A2<sub>x=CO</sub>

Coordinates (Angstroms)

|    | X            | Y            | Z            |
|----|--------------|--------------|--------------|
| 25 | 0.199308000  | -0.236010000 | -0.182868000 |
| 1  | 0.336569000  | 2.694330000  | 2.847621000  |
| 6  | 0.199426000  | -1.410380000 | -1.500423000 |
| 8  | 0.218641000  | -2.152789000 | -2.398413000 |
| 7  | 0.517038000  | 1.601232000  | -0.181841000 |
| 6  | -0.087499000 | -1.549266000 | 0.970310000  |
| 8  | -0.211397000 | -2.397728000 | 1.761490000  |
| 6  | -1.836942000 | 2.167571000  | -0.007171000 |
| 6  | 1.870982000  | 2.096665000  | -0.168523000 |
| 6  | -0.455052000 | 2.654868000  | -0.415301000 |
| 1  | -2.628745000 | 2.808781000  | -0.401043000 |
| 1  | -1.907483000 | 2.123451000  | 1.082059000  |
| 1  | -0.218129000 | 3.552570000  | 0.177846000  |
| 1  | -0.457819000 | 2.966939000  | -1.473377000 |
| 1  | 2.028453000  | 2.843890000  | 0.628767000  |
| 1  | 2.134314000  | 2.604040000  | -1.113189000 |
| 6  | 2.810478000  | 0.950028000  | 0.036129000  |
| 6  | 4.188900000  | 1.108114000  | 0.184555000  |
| 1  | 4.616999000  | 2.105026000  | 0.160230000  |
| 6  | 3.005992000  | -1.350480000 | 0.223450000  |
| 1  | 2.496609000  | -2.307908000 | 0.227046000  |
| 6  | 4.984678000  | -0.013867000 | 0.359278000  |
| 1  | 6.058629000  | 0.085910000  | 0.480489000  |
| 6  | 4.379040000  | -1.271429000 | 0.377451000  |
| 1  | 4.957815000  | -2.178640000 | 0.509287000  |
| 7  | 2.228429000  | -0.262526000 | 0.059884000  |
| 16 | -1.999787000 | 0.477760000  | -0.667928000 |
| 6  | -3.427855000 | -0.252433000 | 0.276288000  |
| 6  | -3.519109000 | -1.700916000 | -0.211871000 |
| 6  | -4.694480000 | 0.517860000  | -0.105606000 |
| 1  | -2.616619000 | -2.269604000 | 0.031091000  |
| 1  | -4.369780000 | -2.189414000 | 0.275988000  |
| 1  | -3.677432000 | -1.750965000 | -1.294399000 |
| 1  | -4.641606000 | 1.564442000  | 0.211109000  |
| 1  | -4.871570000 | 0.488555000  | -1.185357000 |

|   |              |              |             |
|---|--------------|--------------|-------------|
| 1 | -5.556814000 | 0.061932000  | 0.394372000 |
| 6 | -3.209856000 | -0.201461000 | 1.787488000 |
| 1 | -4.028459000 | -0.738969000 | 2.280155000 |
| 1 | -2.269324000 | -0.672690000 | 2.080708000 |
| 1 | -3.218430000 | 0.823451000  | 2.169052000 |
| 1 | 0.318267000  | 2.204913000  | 2.282850000 |

---

**A3**<sub>x=CO</sub>

---

Coordinates (Angstroms)

---

|    | X            | Y            | Z            |
|----|--------------|--------------|--------------|
| 25 | -1.197234000 | 0.970626000  | -0.063093000 |
| 1  | -0.791030000 | -0.086141000 | -1.486713000 |
| 6  | -1.619704000 | 2.279580000  | 1.059192000  |
| 8  | -1.915689000 | 3.153671000  | 1.759713000  |
| 7  | -0.167826000 | -0.129409000 | 1.319404000  |
| 6  | -2.004763000 | 1.885560000  | -1.363640000 |
| 8  | -2.532374000 | 2.531112000  | -2.175407000 |
| 6  | -2.139439000 | -1.464293000 | 1.752029000  |
| 6  | 0.918410000  | 0.666545000  | 1.844864000  |
| 6  | -0.972408000 | -0.710666000 | 2.373788000  |
| 1  | -2.805429000 | -1.881906000 | 2.510084000  |
| 1  | -1.765633000 | -2.267129000 | 1.110669000  |
| 1  | -0.391119000 | -1.428982000 | 2.978421000  |
| 1  | -1.355384000 | 0.052241000  | 3.080056000  |
| 1  | 1.692226000  | 0.060509000  | 2.344486000  |
| 1  | 0.572070000  | 1.403942000  | 2.598235000  |
| 6  | 1.541892000  | 1.428005000  | 0.710761000  |
| 6  | 2.865646000  | 1.861781000  | 0.712351000  |
| 1  | 3.500346000  | 1.630425000  | 1.561163000  |
| 6  | 1.194023000  | 2.353112000  | -1.385999000 |
| 1  | 0.496128000  | 2.527874000  | -2.197564000 |
| 6  | 3.354031000  | 2.560302000  | -0.382936000 |
| 1  | 4.385472000  | 2.897759000  | -0.405967000 |
| 6  | 2.502433000  | 2.804918000  | -1.459017000 |
| 1  | 2.840250000  | 3.336640000  | -2.341353000 |
| 7  | 0.716481000  | 1.682803000  | -0.324347000 |
| 16 | -3.066774000 | -0.271456000 | 0.720522000  |
| 6  | -3.991438000 | -1.345953000 | -0.490644000 |
| 6  | -4.982433000 | -0.404725000 | -1.179716000 |
| 6  | -4.743244000 | -2.421817000 | 0.297824000  |
| 1  | -4.470273000 | 0.413345000  | -1.695875000 |
| 1  | -5.548984000 | -0.968992000 | -1.929033000 |
| 1  | -5.694413000 | 0.023546000  | -0.466843000 |

|   |              |              |              |
|---|--------------|--------------|--------------|
| 1 | -4.060580000 | -3.154592000 | 0.738549000  |
| 1 | -5.354150000 | -1.986962000 | 1.095459000  |
| 1 | -5.409437000 | -2.959900000 | -0.385855000 |
| 6 | -3.064397000 | -1.984156000 | -1.523063000 |
| 1 | -3.643869000 | -2.693931000 | -2.124930000 |
| 1 | -2.647503000 | -1.233833000 | -2.199688000 |
| 1 | -2.239027000 | -2.533780000 | -1.059417000 |
| 1 | -0.707939000 | -0.577757000 | -0.895860000 |
| 1 | 1.297498000  | -1.220262000 | -1.616793000 |
| 1 | 0.447720000  | -1.429732000 | 0.532044000  |
| 6 | 1.653324000  | -2.031562000 | -0.958943000 |
| 8 | 0.712498000  | -2.291509000 | 0.048392000  |
| 6 | 3.008761000  | -1.590662000 | -0.417709000 |
| 6 | 3.938288000  | -0.991843000 | -1.276042000 |
| 6 | 3.359305000  | -1.787408000 | 0.918697000  |
| 6 | 5.190304000  | -0.597674000 | -0.810104000 |
| 1 | 3.673898000  | -0.820949000 | -2.317709000 |
| 6 | 4.611356000  | -1.389728000 | 1.391633000  |
| 1 | 2.638812000  | -2.243084000 | 1.591090000  |
| 6 | 5.531277000  | -0.794263000 | 0.529845000  |
| 1 | 5.896982000  | -0.128579000 | -1.489181000 |
| 1 | 4.865021000  | -1.543645000 | 2.437053000  |
| 1 | 6.503874000  | -0.480744000 | 0.898567000  |
| 6 | 1.790861000  | -3.293839000 | -1.808059000 |
| 1 | 0.818645000  | -3.564893000 | -2.231999000 |
| 1 | 2.499180000  | -3.144182000 | -2.629206000 |
| 1 | 2.147291000  | -4.125910000 | -1.190563000 |

**TSA3-4<sub>x=co</sub>**

Coordinates (Angstroms)

|    | X            | Y            | Z            |
|----|--------------|--------------|--------------|
| 25 | -1.191412000 | 0.982270000  | -0.042236000 |
| 1  | -0.819191000 | -0.018898000 | -1.486371000 |
| 6  | -1.615319000 | 2.261633000  | 1.117622000  |
| 8  | -1.913580000 | 3.118132000  | 1.837030000  |
| 7  | -0.131545000 | -0.141477000 | 1.314950000  |
| 6  | -2.024842000 | 1.922087000  | -1.309642000 |
| 8  | -2.566468000 | 2.575389000  | -2.103265000 |
| 6  | -2.095413000 | -1.495859000 | 1.740469000  |
| 6  | 0.965753000  | 0.658313000  | 1.834416000  |
| 6  | -0.931830000 | -0.746329000 | 2.371376000  |
| 1  | -2.750808000 | -1.929472000 | 2.498312000  |
| 1  | -1.715098000 | -2.284937000 | 1.086531000  |

|    |              |              |              |
|----|--------------|--------------|--------------|
| 1  | -0.337358000 | -1.465127000 | 2.957328000  |
| 1  | -1.302786000 | 0.015748000  | 3.075129000  |
| 1  | 1.742630000  | 0.045321000  | 2.313263000  |
| 1  | 0.608594000  | 1.372872000  | 2.595316000  |
| 6  | 1.563798000  | 1.434346000  | 0.695812000  |
| 6  | 2.893258000  | 1.846729000  | 0.668765000  |
| 1  | 3.549686000  | 1.585053000  | 1.491884000  |
| 6  | 1.170205000  | 2.401788000  | -1.372508000 |
| 1  | 0.454396000  | 2.598463000  | -2.162944000 |
| 6  | 3.360245000  | 2.560522000  | -0.426363000 |
| 1  | 4.395988000  | 2.881665000  | -0.473322000 |
| 6  | 2.481794000  | 2.839635000  | -1.471529000 |
| 1  | 2.801791000  | 3.384779000  | -2.352276000 |
| 7  | 0.713653000  | 1.715792000  | -0.311962000 |
| 16 | -3.044126000 | -0.302381000 | 0.727974000  |
| 6  | -3.940610000 | -1.381930000 | -0.501291000 |
| 6  | -4.947285000 | -0.453541000 | -1.184781000 |
| 6  | -4.674970000 | -2.479842000 | 0.273250000  |
| 1  | -4.450240000 | 0.380807000  | -1.689390000 |
| 1  | -5.497286000 | -1.021365000 | -1.943655000 |
| 1  | -5.672071000 | -0.048392000 | -0.471285000 |
| 1  | -3.980908000 | -3.204799000 | 0.708972000  |
| 1  | -5.298243000 | -2.065611000 | 1.072285000  |
| 1  | -5.327570000 | -3.022955000 | -0.419449000 |
| 6  | -2.993999000 | -1.991840000 | -1.533380000 |
| 1  | -3.549113000 | -2.726680000 | -2.128041000 |
| 1  | -2.608573000 | -1.231143000 | -2.217066000 |
| 1  | -2.144972000 | -2.504843000 | -1.070249000 |
| 1  | -0.665215000 | -0.539709000 | -0.929481000 |
| 1  | 1.324149000  | -1.041279000 | -1.659030000 |
| 1  | 0.334720000  | -1.110634000 | 0.630069000  |
| 6  | 1.584613000  | -1.897696000 | -1.001510000 |
| 8  | 0.621183000  | -2.093627000 | -0.027580000 |
| 6  | 2.969198000  | -1.570727000 | -0.439168000 |
| 6  | 3.954061000  | -1.013695000 | -1.263972000 |
| 6  | 3.282455000  | -1.821210000 | 0.897381000  |
| 6  | 5.218619000  | -0.709424000 | -0.765311000 |
| 1  | 3.721759000  | -0.801568000 | -2.306029000 |
| 6  | 4.547117000  | -1.516133000 | 1.404785000  |
| 1  | 2.514232000  | -2.242372000 | 1.539303000  |
| 6  | 5.520057000  | -0.958435000 | 0.575826000  |
| 1  | 5.967323000  | -0.270645000 | -1.419562000 |
| 1  | 4.770294000  | -1.710169000 | 2.450734000  |
| 1  | 6.503016000  | -0.716801000 | 0.970454000  |

|   |             |              |              |
|---|-------------|--------------|--------------|
| 6 | 1.662533000 | -3.137110000 | -1.902717000 |
| 1 | 0.682849000 | -3.321897000 | -2.356574000 |
| 1 | 2.399443000 | -3.016131000 | -2.705299000 |
| 1 | 1.939427000 | -4.014991000 | -1.306835000 |

---

A4<sub>x=CO</sub>

---

Coordinates (Angstroms)

|    | X            | Y            | Z            |
|----|--------------|--------------|--------------|
| 25 | 1.109858000  | -0.996999000 | -0.093078000 |
| 1  | 0.716564000  | 0.172325000  | -1.360357000 |
| 6  | 1.550996000  | -2.415918000 | 0.889256000  |
| 8  | 1.844144000  | -3.360063000 | 1.491461000  |
| 7  | 0.114889000  | -0.017342000 | 1.438226000  |
| 6  | 1.878998000  | -1.762336000 | -1.509704000 |
| 8  | 2.377790000  | -2.274709000 | -2.423822000 |
| 6  | 2.099629000  | 1.300284000  | 1.861515000  |
| 6  | -0.987420000 | -0.853644000 | 1.906692000  |
| 6  | 0.973397000  | 0.505319000  | 2.503528000  |
| 1  | 2.780739000  | 1.697011000  | 2.616415000  |
| 1  | 1.679456000  | 2.118413000  | 1.268939000  |
| 1  | 0.408011000  | 1.165777000  | 3.174867000  |
| 1  | 1.366045000  | -0.327808000 | 3.098820000  |
| 1  | -1.731866000 | -0.281384000 | 2.473423000  |
| 1  | -0.594259000 | -1.633924000 | 2.571526000  |
| 6  | -1.629366000 | -1.495989000 | 0.707853000  |
| 6  | -2.963103000 | -1.891721000 | 0.692778000  |
| 1  | -3.578209000 | -1.727922000 | 1.570813000  |
| 6  | -1.334774000 | -2.217618000 | -1.471937000 |
| 1  | -0.656143000 | -2.326010000 | -2.310346000 |
| 6  | -3.485248000 | -2.468103000 | -0.457273000 |
| 1  | -4.525905000 | -2.773707000 | -0.496090000 |
| 6  | -2.655791000 | -2.627864000 | -1.564755000 |
| 1  | -3.021233000 | -3.061442000 | -2.488592000 |
| 7  | -0.823196000 | -1.666983000 | -0.359109000 |
| 16 | 3.010138000  | 0.170366000  | 0.747553000  |
| 6  | 3.909887000  | 1.316977000  | -0.416966000 |
| 6  | 4.933680000  | 0.426268000  | -1.125751000 |
| 6  | 4.623176000  | 2.387198000  | 0.412830000  |
| 1  | 4.452558000  | -0.408533000 | -1.645321000 |
| 1  | 5.467436000  | 1.022666000  | -1.874049000 |
| 1  | 5.669257000  | 0.020944000  | -0.423509000 |
| 1  | 3.916382000  | 3.087354000  | 0.868083000  |
| 1  | 5.240475000  | 1.946061000  | 1.202127000  |
| 1  | 5.278961000  | 2.964487000  | -0.248575000 |



|   |              |             |              |
|---|--------------|-------------|--------------|
| 6 | 2.963613000  | 1.958141000 | -1.429063000 |
| 1 | 3.514567000  | 2.720936000 | -1.991964000 |
| 1 | 2.589336000  | 1.218223000 | -2.141895000 |
| 1 | 2.102764000  | 2.436128000 | -0.950140000 |
| 1 | 0.512794000  | 0.690719000 | -0.786113000 |
| 1 | -1.235515000 | 1.355423000 | -1.832064000 |
| 1 | -0.273259000 | 0.824953000 | 0.916048000  |
| 6 | -1.427227000 | 2.088730000 | -1.008353000 |
| 8 | -0.413442000 | 2.086697000 | -0.088385000 |
| 6 | -2.786560000 | 1.679277000 | -0.425664000 |
| 6 | -3.805753000 | 1.181991000 | -1.246210000 |
| 6 | -3.042786000 | 1.816201000 | 0.940573000  |
| 6 | -5.049201000 | 0.835954000 | -0.718867000 |
| 1 | -3.618795000 | 1.053136000 | -2.310993000 |
| 6 | -4.284614000 | 1.471834000 | 1.476514000  |
| 1 | -2.245133000 | 2.186196000 | 1.578984000  |
| 6 | -5.294489000 | 0.981077000 | 0.648093000  |
| 1 | -5.824268000 | 0.444631000 | -1.372789000 |
| 1 | -4.463672000 | 1.583967000 | 2.542914000  |
| 1 | -6.260300000 | 0.707758000 | 1.063951000  |
| 6 | -1.570186000 | 3.462338000 | -1.692556000 |
| 1 | -0.617653000 | 3.736086000 | -2.160189000 |
| 1 | -2.349395000 | 3.464866000 | -2.465181000 |
| 1 | -1.819320000 | 4.226290000 | -0.945684000 |

**TSA4-5<sub>x=co</sub>**

Coordinates (Angstroms)

|    | X            | Y            | Z            |
|----|--------------|--------------|--------------|
| 25 | 1.100628000  | -0.994713000 | -0.098183000 |
| 1  | 0.714657000  | 0.210512000  | -1.316162000 |
| 6  | 1.541649000  | -2.425879000 | 0.863331000  |
| 8  | 1.834848000  | -3.380191000 | 1.451062000  |
| 7  | 0.108306000  | -0.031591000 | 1.449106000  |
| 6  | 1.861118000  | -1.734392000 | -1.530630000 |
| 8  | 2.352589000  | -2.226935000 | -2.460060000 |
| 6  | 2.095562000  | 1.281848000  | 1.875626000  |
| 6  | -0.992412000 | -0.874032000 | 1.911125000  |
| 6  | 0.970385000  | 0.483443000  | 2.515534000  |
| 1  | 2.776983000  | 1.674612000  | 2.632312000  |
| 1  | 1.676103000  | 2.104525000  | 1.288695000  |
| 1  | 0.408025000  | 1.137775000  | 3.195110000  |
| 1  | 1.364249000  | -0.356115000 | 3.100521000  |
| 1  | -1.734967000 | -0.309067000 | 2.487489000  |

|    |              |              |              |
|----|--------------|--------------|--------------|
| 1  | -0.594608000 | -1.661392000 | 2.564301000  |
| 6  | -1.637858000 | -1.501119000 | 0.705812000  |
| 6  | -2.972103000 | -1.894916000 | 0.690607000  |
| 1  | -3.584214000 | -1.740146000 | 1.572442000  |
| 6  | -1.351278000 | -2.195205000 | -1.483327000 |
| 1  | -0.676109000 | -2.292503000 | -2.325841000 |
| 6  | -3.498483000 | -2.457635000 | -0.464348000 |
| 1  | -4.539465000 | -2.762094000 | -0.503465000 |
| 6  | -2.672802000 | -2.604176000 | -1.576404000 |
| 1  | -3.041529000 | -3.026326000 | -2.504256000 |
| 7  | -0.835252000 | -1.658751000 | -0.365808000 |
| 16 | 3.004062000  | 0.157896000  | 0.754519000  |
| 6  | 3.916808000  | 1.310358000  | -0.393839000 |
| 6  | 4.936763000  | 0.419139000  | -1.107537000 |
| 6  | 4.634440000  | 2.366219000  | 0.450354000  |
| 1  | 4.451405000  | -0.407509000 | -1.636177000 |
| 1  | 5.477279000  | 1.018796000  | -1.848340000 |
| 1  | 5.667259000  | 0.002364000  | -0.406664000 |
| 1  | 3.930726000  | 3.066282000  | 0.910537000  |
| 1  | 5.244973000  | 1.911621000  | 1.237301000  |
| 1  | 5.297091000  | 2.946147000  | -0.201872000 |
| 6  | 2.980309000  | 1.968979000  | -1.403444000 |
| 1  | 3.541952000  | 2.727569000  | -1.961569000 |
| 1  | 2.596162000  | 1.237715000  | -2.119856000 |
| 1  | 2.124997000  | 2.454999000  | -0.923414000 |
| 1  | 0.458776000  | 0.767460000  | -0.768505000 |
| 1  | -1.265941000 | 1.326898000  | -1.879958000 |
| 1  | -0.281071000 | 0.803278000  | 0.934662000  |
| 6  | -1.428338000 | 2.065058000  | -1.056082000 |
| 8  | -0.386256000 | 2.046172000  | -0.163330000 |
| 6  | -2.774463000 | 1.677721000  | -0.432608000 |
| 6  | -3.821719000 | 1.188847000  | -1.222299000 |
| 6  | -2.992652000 | 1.827120000  | 0.939061000  |
| 6  | -5.055161000 | 0.863133000  | -0.659863000 |
| 1  | -3.664520000 | 1.050759000  | -2.290633000 |
| 6  | -4.224032000 | 1.502080000  | 1.509918000  |
| 1  | -2.176244000 | 2.192829000  | 1.555789000  |
| 6  | -5.261989000 | 1.019610000  | 0.712100000  |
| 1  | -5.852519000 | 0.478277000  | -1.290326000 |
| 1  | -4.373439000 | 1.623638000  | 2.579777000  |
| 1  | -6.220023000 | 0.762695000  | 1.155329000  |
| 6  | -1.564375000 | 3.440049000  | -1.736114000 |
| 1  | -0.618361000 | 3.698233000  | -2.225132000 |
| 1  | -2.360260000 | 3.453731000  | -2.491180000 |

|   |              |             |              |
|---|--------------|-------------|--------------|
| 1 | -1.785079000 | 4.208439000 | -0.984944000 |
|---|--------------|-------------|--------------|

---

**A5<sub>x=CO</sub>**

---

Coordinates (Angstroms)

|    | X            | Y            | Z            |
|----|--------------|--------------|--------------|
| 25 | -0.928461000 | -1.034943000 | 0.418269000  |
| 1  | -0.109253000 | 0.379719000  | 0.559555000  |
| 6  | -1.796950000 | -2.593030000 | 0.444153000  |
| 8  | -2.358123000 | -3.606704000 | 0.581506000  |
| 7  | -0.654471000 | -0.960806000 | -1.688273000 |
| 1  | -0.081912000 | -0.144012000 | -1.903221000 |
| 6  | -0.971598000 | -0.919760000 | 2.173684000  |
| 8  | -0.971233000 | -0.821736000 | 3.337570000  |
| 6  | -2.692903000 | 0.367693000  | -1.861430000 |
| 6  | 0.121865000  | -2.146351000 | -2.063466000 |
| 6  | -1.918280000 | -0.814400000 | -2.423950000 |
| 1  | -3.649186000 | 0.476405000  | -2.377304000 |
| 1  | -2.114783000 | 1.287988000  | -1.984533000 |
| 1  | -1.740702000 | -0.650537000 | -3.494941000 |
| 1  | -2.487633000 | -1.743165000 | -2.312297000 |
| 1  | 0.548013000  | -2.065227000 | -3.070409000 |
| 1  | -0.549524000 | -3.013548000 | -2.050379000 |
| 6  | 1.208308000  | -2.351820000 | -1.042298000 |
| 6  | 2.429836000  | -2.937567000 | -1.360568000 |
| 1  | 2.631716000  | -3.229144000 | -2.386060000 |
| 6  | 1.825962000  | -2.133684000 | 1.172650000  |
| 1  | 1.557505000  | -1.782803000 | 2.162576000  |
| 6  | 3.368726000  | -3.137541000 | -0.355043000 |
| 1  | 4.326960000  | -3.596233000 | -0.577291000 |
| 6  | 3.057534000  | -2.728621000 | 0.938292000  |
| 1  | 3.759730000  | -2.849877000 | 1.755460000  |
| 7  | 0.911307000  | -1.948770000 | 0.208673000  |
| 16 | -2.981050000 | 0.075821000  | -0.078525000 |
| 6  | -3.302146000 | 1.783632000  | 0.598467000  |
| 6  | -3.704444000 | 1.547465000  | 2.057170000  |
| 6  | -4.469731000 | 2.394922000  | -0.180767000 |
| 1  | -2.897653000 | 1.071903000  | 2.622516000  |
| 1  | -3.921621000 | 2.511942000  | 2.529508000  |
| 1  | -4.600624000 | 0.922663000  | 2.132858000  |
| 1  | -4.199592000 | 2.608717000  | -1.219796000 |
| 1  | -5.345542000 | 1.737637000  | -0.176486000 |
| 1  | -4.753910000 | 3.343211000  | 0.289671000  |
| 6  | -2.079208000 | 2.694634000  | 0.531620000  |

|   |              |              |              |
|---|--------------|--------------|--------------|
| 1 | -2.354517000 | 3.678898000  | 0.928870000  |
| 1 | -1.255597000 | 2.299451000  | 1.130624000  |
| 1 | -1.723135000 | 2.834773000  | -0.493087000 |
| 1 | 0.752242000  | 3.493131000  | -0.406109000 |
| 1 | 0.186127000  | 1.244511000  | -0.626488000 |
| 6 | 1.330780000  | 2.784125000  | -1.018073000 |
| 8 | 0.480074000  | 1.731526000  | -1.436716000 |
| 6 | 2.488311000  | 2.279059000  | -0.171262000 |
| 6 | 2.950911000  | 3.044258000  | 0.901870000  |
| 6 | 3.127164000  | 1.070260000  | -0.466006000 |
| 6 | 4.036291000  | 2.617120000  | 1.666926000  |
| 1 | 2.452709000  | 3.980257000  | 1.144692000  |
| 6 | 4.212956000  | 0.641249000  | 0.295592000  |
| 1 | 2.762842000  | 0.457932000  | -1.286837000 |
| 6 | 4.671429000  | 1.413032000  | 1.364665000  |
| 1 | 4.380232000  | 3.220802000  | 2.502093000  |
| 1 | 4.698682000  | -0.300931000 | 0.058943000  |
| 1 | 5.513826000  | 1.074294000  | 1.960918000  |
| 6 | 1.820473000  | 3.507054000  | -2.265893000 |
| 1 | 0.968734000  | 3.877311000  | -2.845197000 |
| 1 | 2.452281000  | 4.357952000  | -1.992493000 |
| 1 | 2.406616000  | 2.828392000  | -2.895354000 |

-----  
**TSA2-6<sub>x=co</sub>**  
 -----

Coordinates (Angstroms)

|    | X            | Y            | Z            |
|----|--------------|--------------|--------------|
| 25 | 0.165713000  | 0.292729000  | 0.156350000  |
| 1  | -0.047489000 | 0.155879000  | -1.557928000 |
| 6  | 0.440516000  | 0.307343000  | 1.918207000  |
| 8  | 0.620090000  | 0.342008000  | 3.064485000  |
| 7  | 0.529818000  | -1.698956000 | -0.289966000 |
| 1  | 0.195460000  | -0.713194000 | -1.258051000 |
| 6  | -0.134235000 | 2.042028000  | 0.128526000  |
| 8  | -0.312767000 | 3.192720000  | 0.100925000  |
| 6  | -1.852941000 | -2.137204000 | -0.197001000 |
| 6  | 1.881603000  | -2.029581000 | 0.075595000  |
| 6  | -0.463442000 | -2.631019000 | 0.180600000  |
| 1  | -2.629596000 | -2.799084000 | 0.191609000  |
| 1  | -1.946772000 | -2.071622000 | -1.285016000 |
| 1  | -0.330088000 | -3.631929000 | -0.263725000 |
| 1  | -0.402776000 | -2.761011000 | 1.279344000  |
| 1  | 2.255050000  | -2.938736000 | -0.422685000 |
| 1  | 1.968236000  | -2.213225000 | 1.167380000  |
| 6  | 2.781104000  | -0.870183000 | -0.256014000 |

|    |              |              |              |
|----|--------------|--------------|--------------|
| 6  | 4.138251000  | -1.016997000 | -0.533649000 |
| 1  | 4.576746000  | -2.009306000 | -0.547882000 |
| 6  | 2.934662000  | 1.428680000  | -0.488542000 |
| 1  | 2.419653000  | 2.382179000  | -0.464548000 |
| 6  | 4.906843000  | 0.111834000  | -0.788981000 |
| 1  | 5.966487000  | 0.018708000  | -1.005144000 |
| 6  | 4.291907000  | 1.361288000  | -0.765658000 |
| 1  | 4.846193000  | 2.272430000  | -0.960712000 |
| 7  | 2.189584000  | 0.340618000  | -0.236555000 |
| 16 | -2.058824000 | -0.463980000 | 0.515575000  |
| 6  | -3.403981000 | 0.298874000  | -0.524279000 |
| 6  | -3.774109000 | 1.594439000  | 0.203087000  |
| 6  | -4.602538000 | -0.653258000 | -0.543465000 |
| 1  | -2.919783000 | 2.273218000  | 0.280866000  |
| 1  | -4.559799000 | 2.109599000  | -0.360928000 |
| 1  | -4.154251000 | 1.395337000  | 1.210266000  |
| 1  | -4.386191000 | -1.572972000 | -1.095383000 |
| 1  | -4.920269000 | -0.919357000 | 0.470005000  |
| 1  | -5.442424000 | -0.156666000 | -1.042719000 |
| 6  | -2.929199000 | 0.603067000  | -1.943140000 |
| 1  | -3.773428000 | 0.999579000  | -2.519458000 |
| 1  | -2.132818000 | 1.351579000  | -1.944509000 |
| 1  | -2.564830000 | -0.291262000 | -2.458097000 |

**A6<sub>x=CO</sub>**

| -----                   |              |              |              |
|-------------------------|--------------|--------------|--------------|
| Coordinates (Angstroms) |              |              |              |
|                         | X            | Y            | Z            |
| -----                   |              |              |              |
| 25                      | 0.177793000  | 0.341905000  | 0.146762000  |
| 1                       | -0.055313000 | 0.547942000  | -1.469402000 |
| 6                       | 0.464333000  | 0.213719000  | 1.902348000  |
| 8                       | 0.646721000  | 0.239316000  | 3.054986000  |
| 7                       | 0.515845000  | -1.699421000 | -0.300486000 |
| 1                       | 0.451563000  | -1.770032000 | -1.313541000 |
| 6                       | -0.081404000 | 2.079279000  | 0.265438000  |
| 8                       | -0.241866000 | 3.235661000  | 0.322665000  |
| 6                       | -1.879431000 | -2.103722000 | -0.100656000 |
| 6                       | 1.890133000  | -2.020076000 | 0.094507000  |
| 6                       | -0.492788000 | -2.595522000 | 0.279369000  |
| 1                       | -2.644933000 | -2.741045000 | 0.346755000  |
| 1                       | -1.998697000 | -2.120074000 | -1.188045000 |
| 1                       | -0.364945000 | -3.626821000 | -0.074553000 |
| 1                       | -0.362703000 | -2.589605000 | 1.366816000  |
| 1                       | 2.252008000  | -2.950412000 | -0.358857000 |

|    |              |              |              |
|----|--------------|--------------|--------------|
| 1  | 1.904553000  | -2.150257000 | 1.183588000  |
| 6  | 2.786645000  | -0.867015000 | -0.268725000 |
| 6  | 4.136530000  | -1.036985000 | -0.561283000 |
| 1  | 4.562875000  | -2.034727000 | -0.565036000 |
| 6  | 2.955600000  | 1.419602000  | -0.544782000 |
| 1  | 2.447287000  | 2.376965000  | -0.541103000 |
| 6  | 4.914720000  | 0.079706000  | -0.844525000 |
| 1  | 5.970530000  | -0.027675000 | -1.071808000 |
| 6  | 4.309992000  | 1.333285000  | -0.835856000 |
| 1  | 4.869582000  | 2.235734000  | -1.055364000 |
| 7  | 2.201590000  | 0.346494000  | -0.261470000 |
| 16 | -2.072291000 | -0.386168000 | 0.497383000  |
| 6  | -3.441608000 | 0.283245000  | -0.577270000 |
| 6  | -3.765198000 | 1.654253000  | 0.023204000  |
| 6  | -4.650554000 | -0.647638000 | -0.450735000 |
| 1  | -2.898665000 | 2.321726000  | -0.007590000 |
| 1  | -4.568593000 | 2.120263000  | -0.558207000 |
| 1  | -4.103806000 | 1.569492000  | 1.061193000  |
| 1  | -4.470465000 | -1.616958000 | -0.926014000 |
| 1  | -4.920721000 | -0.817314000 | 0.596646000  |
| 1  | -5.509137000 | -0.187442000 | -0.953274000 |
| 6  | -3.029040000 | 0.431422000  | -2.038581000 |
| 1  | -3.894618000 | 0.783062000  | -2.612709000 |
| 1  | -2.218886000 | 1.155049000  | -2.152402000 |
| 1  | -2.703545000 | -0.517464000 | -2.476503000 |

**A7R<sub>x=CO</sub>**

Coordinates (Angstroms)

|    | X            | Y            | Z            |
|----|--------------|--------------|--------------|
| 25 | -0.742910000 | -1.134931000 | 0.133170000  |
| 1  | -0.436905000 | 0.196081000  | 1.036142000  |
| 6  | -1.052323000 | -2.655911000 | -0.743573000 |
| 8  | -1.269137000 | -3.699109000 | -1.222065000 |
| 7  | 0.071238000  | -0.065038000 | -1.498157000 |
| 1  | 0.386938000  | 0.821754000  | -1.110554000 |
| 6  | -1.312725000 | -1.792913000 | 1.659911000  |
| 8  | -1.676382000 | -2.198285000 | 2.695094000  |
| 6  | -2.141897000 | 0.865533000  | -1.936663000 |
| 6  | 1.245700000  | -0.798316000 | -1.976614000 |
| 6  | -0.905003000 | 0.234535000  | -2.553715000 |
| 1  | -2.888515000 | 1.067756000  | -2.707447000 |
| 1  | -1.873430000 | 1.803731000  | -1.443503000 |
| 1  | -0.487245000 | 0.921040000  | -3.302217000 |

|    |              |              |              |
|----|--------------|--------------|--------------|
| 1  | -1.157164000 | -0.705177000 | -3.056480000 |
| 1  | 1.906859000  | -0.174483000 | -2.590606000 |
| 1  | 0.893299000  | -1.627111000 | -2.602867000 |
| 6  | 1.995682000  | -1.365768000 | -0.801929000 |
| 6  | 3.349763000  | -1.678344000 | -0.872554000 |
| 1  | 3.898495000  | -1.470541000 | -1.785245000 |
| 6  | 1.877438000  | -2.121288000 | 1.376642000  |
| 1  | 1.260004000  | -2.275162000 | 2.254477000  |
| 6  | 3.973758000  | -2.245965000 | 0.230926000  |
| 1  | 5.029139000  | -2.497526000 | 0.198688000  |
| 6  | 3.222367000  | -2.464390000 | 1.381987000  |
| 1  | 3.663727000  | -2.892505000 | 2.275059000  |
| 7  | 1.264574000  | -1.593374000 | 0.305855000  |
| 16 | -2.826525000 | -0.288163000 | -0.694078000 |
| 6  | -3.861798000 | 0.826563000  | 0.384790000  |
| 6  | -4.617733000 | -0.122307000 | 1.319021000  |
| 6  | -4.848806000 | 1.585984000  | -0.505557000 |
| 1  | -3.932890000 | -0.709597000 | 1.938207000  |
| 1  | -5.253531000 | 0.468389000  | 1.988233000  |
| 1  | -5.260394000 | -0.810425000 | 0.759893000  |
| 1  | -4.341099000 | 2.305774000  | -1.154926000 |
| 1  | -5.438087000 | 0.906395000  | -1.130195000 |
| 1  | -5.540954000 | 2.148646000  | 0.131505000  |
| 6  | -3.009531000 | 1.799361000  | 1.192560000  |
| 1  | -3.669453000 | 2.450695000  | 1.778402000  |
| 1  | -2.346819000 | 1.267573000  | 1.878271000  |
| 1  | -2.394192000 | 2.434800000  | 0.549265000  |
| 6  | 0.645572000  | 2.950487000  | 0.436852000  |
| 8  | -0.027761000 | 3.149338000  | -0.568496000 |
| 6  | 2.017297000  | 2.364105000  | 0.309305000  |
| 6  | 2.673838000  | 1.774482000  | 1.396638000  |
| 6  | 2.661120000  | 2.424580000  | -0.933053000 |
| 6  | 3.957809000  | 1.259651000  | 1.242213000  |
| 1  | 2.182006000  | 1.701038000  | 2.361120000  |
| 6  | 3.950010000  | 1.922554000  | -1.082241000 |
| 1  | 2.147788000  | 2.880484000  | -1.774228000 |
| 6  | 4.599759000  | 1.341072000  | 0.006657000  |
| 1  | 4.455453000  | 0.791273000  | 2.085670000  |
| 1  | 4.447130000  | 1.984035000  | -2.045584000 |
| 1  | 5.602311000  | 0.940139000  | -0.110375000 |
| 6  | 0.137321000  | 3.310456000  | 1.805062000  |
| 1  | -0.798316000 | 3.863361000  | 1.715793000  |
| 1  | -0.042829000 | 2.395042000  | 2.379433000  |
| 1  | 0.875679000  | 3.906764000  | 2.349950000  |

-----  
**A7S<sub>x=CO</sub>**  
-----

Coordinates (Angstroms)

|    | X            | Y            | Z            |
|----|--------------|--------------|--------------|
| 25 | 0.849365000  | -1.153589000 | 0.259387000  |
| 1  | -0.002353000 | 0.134000000  | 0.789364000  |
| 6  | 1.812286000  | -2.579411000 | -0.210712000 |
| 8  | 2.437921000  | -3.543243000 | -0.421382000 |
| 7  | 0.815902000  | -0.220887000 | -1.635926000 |
| 1  | 0.371761000  | 0.684636000  | -1.491725000 |
| 6  | 0.752526000  | -1.643339000 | 1.943338000  |
| 8  | 0.662968000  | -1.929224000 | 3.074502000  |
| 6  | -1.340952000 | -1.261059000 | -2.058404000 |
| 6  | 2.202735000  | 0.040657000  | -2.027578000 |
| 6  | 0.030551000  | -0.950672000 | -2.636958000 |
| 1  | -1.945031000 | -1.812178000 | -2.781943000 |
| 1  | -1.857225000 | -0.331851000 | -1.796301000 |
| 1  | -0.088643000 | -0.366404000 | -3.559199000 |
| 1  | 0.564816000  | -1.874055000 | -2.886007000 |
| 1  | 2.277634000  | 0.766652000  | -2.845583000 |
| 1  | 2.644744000  | -0.903312000 | -2.370548000 |
| 6  | 2.960238000  | 0.523911000  | -0.820038000 |
| 6  | 4.052391000  | 1.381576000  | -0.915412000 |
| 1  | 4.359133000  | 1.750727000  | -1.888573000 |
| 6  | 3.171652000  | 0.421148000  | 1.477729000  |
| 1  | 2.780475000  | 0.029141000  | 2.409658000  |
| 6  | 4.726506000  | 1.753569000  | 0.241535000  |
| 1  | 5.580357000  | 2.421969000  | 0.192534000  |
| 6  | 4.276176000  | 1.260491000  | 1.463592000  |
| 1  | 4.763268000  | 1.522970000  | 2.396120000  |
| 7  | 2.521400000  | 0.052930000  | 0.362796000  |
| 16 | -1.106108000 | -2.263476000 | -0.548125000 |
| 6  | -2.721480000 | -2.060570000 | 0.358508000  |
| 6  | -2.648735000 | -3.071788000 | 1.506725000  |
| 6  | -3.864078000 | -2.421472000 | -0.594399000 |
| 1  | -1.809267000 | -2.858080000 | 2.175357000  |
| 1  | -3.571507000 | -3.011998000 | 2.094651000  |
| 1  | -2.547942000 | -4.097174000 | 1.135706000  |
| 1  | -3.984236000 | -1.674305000 | -1.385375000 |
| 1  | -3.711398000 | -3.401348000 | -1.058858000 |
| 1  | -4.802314000 | -2.456677000 | -0.028527000 |
| 6  | -2.905144000 | -0.650003000 | 0.907111000  |
| 1  | -3.891836000 | -0.578126000 | 1.380358000  |
| 1  | -2.143878000 | -0.411032000 | 1.652364000  |



|   |              |             |              |
|---|--------------|-------------|--------------|
| 1 | -2.856659000 | 0.106001000 | 0.118894000  |
| 6 | 0.056294000  | 2.896968000 | -0.106782000 |
| 8 | 0.569831000  | 2.750358000 | -1.211499000 |
| 6 | -1.432902000 | 2.831744000 | 0.036700000  |
| 6 | -2.063539000 | 2.933636000 | 1.282216000  |
| 6 | -2.213236000 | 2.671199000 | -1.115749000 |
| 6 | -3.452783000 | 2.881168000 | 1.371304000  |
| 1 | -1.479769000 | 3.047137000 | 2.189971000  |
| 6 | -3.600327000 | 2.619504000 | -1.026350000 |
| 1 | -1.721035000 | 2.589275000 | -2.079648000 |
| 6 | -4.222371000 | 2.727246000 | 0.218725000  |
| 1 | -3.934014000 | 2.958001000 | 2.341414000  |
| 1 | -4.196142000 | 2.494696000 | -1.925533000 |
| 1 | -5.305189000 | 2.684403000 | 0.291455000  |
| 6 | 0.906812000  | 3.173201000 | 1.101810000  |
| 1 | 1.958356000  | 3.166586000 | 0.810491000  |
| 1 | 0.650833000  | 4.148156000 | 1.531115000  |
| 1 | 0.738053000  | 2.413878000 | 1.871185000  |

**TSA7-8R<sub>x=CO</sub>**

| -----                   |              |              |              |
|-------------------------|--------------|--------------|--------------|
| Coordinates (Angstroms) |              |              |              |
|                         | X            | Y            | Z            |
| -----                   |              |              |              |
| 25                      | -0.598894000 | -0.642575000 | 0.491835000  |
| 1                       | -0.159677000 | 0.863735000  | -0.212328000 |
| 6                       | -0.968195000 | -2.175593000 | 1.310276000  |
| 8                       | -1.187912000 | -3.151319000 | 1.907518000  |
| 7                       | -0.439736000 | -1.305719000 | -1.469212000 |
| 1                       | -0.048169000 | -0.475850000 | -1.943829000 |
| 6                       | -0.588952000 | 0.272995000  | 2.000360000  |
| 8                       | -0.572435000 | 0.910141000  | 2.978309000  |
| 6                       | -2.732070000 | -0.572353000 | -1.859814000 |
| 6                       | 0.586631000  | -2.346375000 | -1.544641000 |
| 6                       | -1.696446000 | -1.651865000 | -2.145364000 |
| 1                       | -3.682401000 | -0.818366000 | -2.338092000 |
| 1                       | -2.384478000 | 0.399930000  | -2.222443000 |
| 1                       | -1.550754000 | -1.741305000 | -3.229701000 |
| 1                       | -2.042854000 | -2.621069000 | -1.768755000 |
| 1                       | 0.961679000  | -2.489470000 | -2.565699000 |
| 1                       | 0.147162000  | -3.295195000 | -1.211881000 |
| 6                       | 1.713160000  | -1.985627000 | -0.613697000 |
| 6                       | 3.003004000  | -2.481938000 | -0.780792000 |
| 1                       | 3.232011000  | -3.098296000 | -1.644063000 |
| 6                       | 2.321794000  | -0.910251000 | 1.339175000  |

|    |              |              |              |
|----|--------------|--------------|--------------|
| 1  | 2.015357000  | -0.270384000 | 2.158090000  |
| 6  | 3.971091000  | -2.187818000 | 0.171217000  |
| 1  | 4.981377000  | -2.570395000 | 0.065892000  |
| 6  | 3.620102000  | -1.390375000 | 1.256944000  |
| 1  | 4.338967000  | -1.128202000 | 2.024678000  |
| 7  | 1.380857000  | -1.196571000 | 0.425726000  |
| 16 | -2.929704000 | -0.519586000 | -0.047954000 |
| 6  | -3.936043000 | 1.002541000  | 0.301049000  |
| 6  | -4.223759000 | 0.931781000  | 1.803831000  |
| 6  | -5.240054000 | 0.926103000  | -0.495885000 |
| 1  | -3.300940000 | 0.963071000  | 2.390990000  |
| 1  | -4.834039000 | 1.795147000  | 2.091415000  |
| 1  | -4.774594000 | 0.023139000  | 2.068385000  |
| 1  | -5.062712000 | 1.008259000  | -1.572841000 |
| 1  | -5.778864000 | -0.006803000 | -0.300534000 |
| 1  | -5.886858000 | 1.761061000  | -0.202476000 |
| 6  | -3.169362000 | 2.274609000  | -0.034107000 |
| 1  | -3.767664000 | 3.145163000  | 0.260809000  |
| 1  | -2.214976000 | 2.310993000  | 0.497048000  |
| 1  | -2.975980000 | 2.353933000  | -1.106839000 |
| 6  | 0.788608000  | 1.699670000  | -1.453275000 |
| 8  | 0.783832000  | 0.955523000  | -2.462783000 |
| 6  | 2.060006000  | 1.803496000  | -0.637999000 |
| 6  | 2.106702000  | 2.442737000  | 0.605684000  |
| 6  | 3.243700000  | 1.309945000  | -1.190605000 |
| 6  | 3.316737000  | 2.592786000  | 1.277503000  |
| 1  | 1.192069000  | 2.806910000  | 1.063926000  |
| 6  | 4.457428000  | 1.461346000  | -0.521041000 |
| 1  | 3.201868000  | 0.813577000  | -2.154843000 |
| 6  | 4.498363000  | 2.107051000  | 0.713304000  |
| 1  | 3.338442000  | 3.086399000  | 2.244864000  |
| 1  | 5.369826000  | 1.071661000  | -0.963647000 |
| 1  | 5.442699000  | 2.227505000  | 1.236362000  |
| 6  | -0.095937000 | 2.931271000  | -1.465651000 |
| 1  | -1.029484000 | 2.704993000  | -1.981448000 |
| 1  | -0.311665000 | 3.330617000  | -0.474025000 |
| 1  | 0.437475000  | 3.703443000  | -2.036410000 |

**TSA7-8S<sub>x=CO</sub>**

Coordinates (Angstroms)

|    | X            | Y            | Z           |
|----|--------------|--------------|-------------|
| 25 | 0.830125000  | -0.848976000 | 0.312947000 |
| 1  | -0.038858000 | 0.653184000  | 0.380631000 |

|    |              |              |              |
|----|--------------|--------------|--------------|
| 6  | 1.780626000  | -2.350471000 | 0.334310000  |
| 8  | 2.419551000  | -3.320784000 | 0.413065000  |
| 7  | 1.012971000  | -0.323406000 | -1.687091000 |
| 1  | 0.662679000  | 0.648879000  | -1.681907000 |
| 6  | 0.509095000  | -0.910966000 | 2.049204000  |
| 8  | 0.283464000  | -0.906932000 | 3.193895000  |
| 6  | -1.195585000 | -1.280141000 | -2.083028000 |
| 6  | 2.433472000  | -0.235895000 | -2.028280000 |
| 6  | 0.207809000  | -1.093674000 | -2.643336000 |
| 1  | -1.804497000 | -1.871637000 | -2.769913000 |
| 1  | -1.676287000 | -0.312268000 | -1.912550000 |
| 1  | 0.149244000  | -0.582928000 | -3.613131000 |
| 1  | 0.687493000  | -2.066067000 | -2.800863000 |
| 1  | 2.607915000  | 0.336743000  | -2.947651000 |
| 1  | 2.819817000  | -1.250718000 | -2.185808000 |
| 6  | 3.164150000  | 0.388311000  | -0.869641000 |
| 6  | 4.369997000  | 1.065514000  | -1.026968000 |
| 1  | 4.784285000  | 1.197410000  | -2.021095000 |
| 6  | 3.234597000  | 0.685644000  | 1.421805000  |
| 1  | 2.744612000  | 0.526074000  | 2.375385000  |
| 6  | 5.024092000  | 1.556181000  | 0.096457000  |
| 1  | 5.967493000  | 2.083591000  | -0.002301000 |
| 6  | 4.446219000  | 1.356471000  | 1.347636000  |
| 1  | 4.916002000  | 1.719776000  | 2.254644000  |
| 7  | 2.596055000  | 0.213519000  | 0.339330000  |
| 16 | -1.005239000 | -2.155914000 | -0.495896000 |
| 6  | -2.675650000 | -2.082879000 | 0.315415000  |
| 6  | -2.567751000 | -3.053688000 | 1.495708000  |
| 6  | -3.732223000 | -2.566616000 | -0.679521000 |
| 1  | -1.780246000 | -2.752136000 | 2.193946000  |
| 1  | -3.517287000 | -3.056075000 | 2.042384000  |
| 1  | -2.364671000 | -4.076494000 | 1.162063000  |
| 1  | -3.871609000 | -1.854824000 | -1.499253000 |
| 1  | -3.475804000 | -3.543382000 | -1.102438000 |
| 1  | -4.692018000 | -2.663351000 | -0.159132000 |
| 6  | -2.998013000 | -0.679258000 | 0.808063000  |
| 1  | -3.977911000 | -0.686110000 | 1.300035000  |
| 1  | -2.253578000 | -0.330482000 | 1.527359000  |
| 1  | -3.039688000 | 0.036463000  | -0.015683000 |
| 6  | -0.104364000 | 2.303224000  | -0.154649000 |
| 8  | 0.396809000  | 2.329539000  | -1.306758000 |
| 6  | -1.612954000 | 2.398169000  | -0.040688000 |
| 6  | -2.263261000 | 2.583159000  | 1.183715000  |
| 6  | -2.376400000 | 2.364291000  | -1.211678000 |

|   |              |             |              |
|---|--------------|-------------|--------------|
| 6 | -3.648581000 | 2.725821000 | 1.235147000  |
| 1 | -1.696908000 | 2.602951000 | 2.109546000  |
| 6 | -3.762135000 | 2.502206000 | -1.162800000 |
| 1 | -1.867650000 | 2.235666000 | -2.161834000 |
| 6 | -4.403367000 | 2.685340000 | 0.062669000  |
| 1 | -4.139583000 | 2.865493000 | 2.193994000  |
| 1 | -4.340411000 | 2.472769000 | -2.082151000 |
| 1 | -5.482939000 | 2.797674000 | 0.104633000  |
| 6 | 0.705599000  | 2.875945000 | 0.994079000  |
| 1 | 1.765981000  | 2.746569000 | 0.778583000  |
| 1 | 0.494793000  | 3.951830000 | 1.053065000  |
| 1 | 0.476306000  | 2.424937000 | 1.961103000  |

**A8R** <sub>X=CO</sub>

Coordinates (Angstroms)

|    | X            | Y            | Z            |
|----|--------------|--------------|--------------|
| 25 | 0.660451000  | -0.940310000 | -0.361511000 |
| 1  | 0.166891000  | 1.648038000  | 0.271322000  |
| 6  | 1.030007000  | -2.426540000 | -1.211459000 |
| 8  | 1.247734000  | -3.433845000 | -1.753043000 |
| 7  | 0.484469000  | -1.130566000 | 1.539409000  |
| 1  | -0.177647000 | 0.505072000  | 1.982722000  |
| 6  | 0.596568000  | -0.087301000 | -1.928150000 |
| 8  | 0.551883000  | 0.445301000  | -2.963142000 |
| 6  | 2.694347000  | -0.245809000 | 1.968157000  |
| 6  | -0.649445000 | -1.900473000 | 2.003702000  |
| 6  | 1.622498000  | -1.216355000 | 2.439117000  |
| 1  | 3.636809000  | -0.388895000 | 2.500787000  |
| 1  | 2.351018000  | 0.784074000  | 2.099152000  |
| 1  | 1.340608000  | -0.944742000 | 3.469578000  |
| 1  | 2.032036000  | -2.240621000 | 2.482214000  |
| 1  | -1.047281000 | -1.531007000 | 2.964178000  |
| 1  | -0.386050000 | -2.960436000 | 2.170512000  |
| 6  | -1.727143000 | -1.840805000 | 0.964237000  |
| 6  | -3.045259000 | -2.222518000 | 1.211064000  |
| 1  | -3.323748000 | -2.564702000 | 2.202610000  |
| 6  | -2.236781000 | -1.330600000 | -1.236390000 |
| 1  | -1.876616000 | -0.967940000 | -2.192216000 |
| 6  | -3.974387000 | -2.154306000 | 0.184198000  |
| 1  | -5.007555000 | -2.440316000 | 0.354285000  |
| 6  | -3.559728000 | -1.700157000 | -1.067702000 |
| 1  | -4.251061000 | -1.622946000 | -1.899071000 |
| 7  | -1.331552000 | -1.393857000 | -0.242240000 |
| 16 | 2.932162000  | -0.568283000 | 0.188494000  |

|   |              |              |              |
|---|--------------|--------------|--------------|
| 6 | 3.784174000  | 0.960837000  | -0.445064000 |
| 6 | 4.161357000  | 0.627403000  | -1.890994000 |
| 6 | 5.043765000  | 1.199593000  | 0.391069000  |
| 1 | 3.281159000  | 0.385669000  | -2.494313000 |
| 1 | 4.650268000  | 1.497062000  | -2.343587000 |
| 1 | 4.856693000  | -0.216977000 | -1.937976000 |
| 1 | 4.801576000  | 1.478662000  | 1.421261000  |
| 1 | 5.689624000  | 0.315684000  | 0.410981000  |
| 1 | 5.610647000  | 2.025966000  | -0.052436000 |
| 6 | 2.870389000  | 2.182746000  | -0.392742000 |
| 1 | 3.419726000  | 3.055525000  | -0.764449000 |
| 1 | 1.984440000  | 2.048682000  | -1.017585000 |
| 1 | 2.548113000  | 2.405358000  | 0.628460000  |
| 6 | -0.571864000 | 2.093201000  | 0.958157000  |
| 8 | -0.512644000 | 1.414539000  | 2.192154000  |
| 6 | -1.932764000 | 1.973550000  | 0.285144000  |
| 6 | -2.060830000 | 2.281097000  | -1.074182000 |
| 6 | -3.068722000 | 1.586658000  | 0.996570000  |
| 6 | -3.300098000 | 2.215655000  | -1.707136000 |
| 1 | -1.179300000 | 2.568721000  | -1.643117000 |
| 6 | -4.312761000 | 1.521417000  | 0.366608000  |
| 1 | -2.968590000 | 1.329460000  | 2.046534000  |
| 6 | -4.434110000 | 1.838771000  | -0.985369000 |
| 1 | -3.380694000 | 2.450508000  | -2.764990000 |
| 1 | -5.188004000 | 1.214591000  | 0.932958000  |
| 1 | -5.400891000 | 1.780317000  | -1.477101000 |
| 6 | -0.202882000 | 3.556904000  | 1.181280000  |
| 1 | 0.787360000  | 3.630877000  | 1.641120000  |
| 1 | -0.188301000 | 4.106055000  | 0.234489000  |
| 1 | -0.931293000 | 4.033715000  | 1.846902000  |

-----  
**A8S<sub>x=co</sub>**  
 -----

Coordinates (Angstroms)

|    | X            | Y            | Z            |
|----|--------------|--------------|--------------|
| 25 | -0.795875000 | -1.092796000 | -0.279083000 |
| 1  | -0.528145000 | 1.726297000  | -0.353885000 |
| 6  | -1.537588000 | -2.517144000 | -0.984184000 |
| 8  | -2.053674000 | -3.458308000 | -1.435016000 |
| 7  | -1.084112000 | -0.746983000 | 1.570753000  |
| 1  | -0.463743000 | 0.997419000  | 1.621130000  |
| 6  | -0.168716000 | -0.657562000 | -1.889775000 |
| 8  | 0.213091000  | -0.365376000 | -2.950819000 |
| 6  | 1.097714000  | -1.578160000 | 2.208707000  |

|    |              |              |              |
|----|--------------|--------------|--------------|
| 6  | -2.430687000 | -0.388090000 | 1.965128000  |
| 6  | -0.346225000 | -1.390301000 | 2.645573000  |
| 1  | 1.650967000  | -2.219438000 | 2.897905000  |
| 1  | 1.599101000  | -0.609844000 | 2.126120000  |
| 1  | -0.356232000 | -0.776600000 | 3.560892000  |
| 1  | -0.790002000 | -2.365184000 | 2.911238000  |
| 1  | -2.449139000 | 0.327705000  | 2.802712000  |
| 1  | -3.002658000 | -1.271065000 | 2.300443000  |
| 6  | -3.130552000 | 0.212706000  | 0.784957000  |
| 6  | -4.320209000 | 0.933411000  | 0.886418000  |
| 1  | -4.772861000 | 1.081043000  | 1.861497000  |
| 6  | -3.092906000 | 0.507471000  | -1.512230000 |
| 1  | -2.576721000 | 0.314369000  | -2.445724000 |
| 6  | -4.899416000 | 1.450966000  | -0.262466000 |
| 1  | -5.824157000 | 2.016538000  | -0.207097000 |
| 6  | -4.271104000 | 1.233544000  | -1.489208000 |
| 1  | -4.684489000 | 1.619682000  | -2.414030000 |
| 7  | -2.524654000 | 0.006789000  | -0.399228000 |
| 16 | 1.026566000  | -2.350158000 | 0.558501000  |
| 6  | 2.729195000  | -2.091130000 | -0.147503000 |
| 6  | 2.731933000  | -2.877954000 | -1.461087000 |
| 6  | 3.753573000  | -2.678751000 | 0.826090000  |
| 1  | 1.969839000  | -2.511517000 | -2.155847000 |
| 1  | 3.708640000  | -2.763065000 | -1.944050000 |
| 1  | 2.560019000  | -3.945544000 | -1.289671000 |
| 1  | 3.793709000  | -2.115550000 | 1.763645000  |
| 1  | 3.538860000  | -3.727604000 | 1.055026000  |
| 1  | 4.747296000  | -2.627483000 | 0.366886000  |
| 6  | 3.014693000  | -0.613795000 | -0.401332000 |
| 1  | 4.015338000  | -0.511449000 | -0.836949000 |
| 1  | 2.295513000  | -0.182065000 | -1.099853000 |
| 1  | 2.994321000  | -0.028295000 | 0.521831000  |
| 6  | -0.132668000 | 2.455693000  | 0.370004000  |
| 8  | -0.349814000 | 1.976819000  | 1.679714000  |
| 6  | 1.347455000  | 2.633108000  | 0.065329000  |
| 6  | 1.777116000  | 2.702109000  | -1.264165000 |
| 6  | 2.293733000  | 2.747154000  | 1.085078000  |
| 6  | 3.124855000  | 2.876621000  | -1.570208000 |
| 1  | 1.048888000  | 2.604202000  | -2.066385000 |
| 6  | 3.645021000  | 2.924797000  | 0.783132000  |
| 1  | 1.965273000  | 2.677944000  | 2.117593000  |
| 6  | 4.065846000  | 2.988143000  | -0.544816000 |
| 1  | 3.442656000  | 2.917242000  | -2.608471000 |
| 1  | 4.372004000  | 3.005745000  | 1.586805000  |

|   |              |             |              |
|---|--------------|-------------|--------------|
| 1 | 5.118311000  | 3.119265000 | -0.779456000 |
| 6 | -0.894207000 | 3.767159000 | 0.195072000  |
| 1 | -1.964457000 | 3.602738000 | 0.356399000  |
| 1 | -0.541112000 | 4.508788000 | 0.920643000  |
| 1 | -0.751780000 | 4.174460000 | -0.811083000 |

**PhCOMe**

Coordinates (Angstroms)

|   | X            | Y            | Z            |
|---|--------------|--------------|--------------|
| 6 | 1.697046000  | -0.202738000 | 0.000058000  |
| 8 | 2.211879000  | -1.306215000 | 0.000124000  |
| 6 | 0.203093000  | -0.058471000 | 0.000000000  |
| 6 | -0.427771000 | 1.189942000  | 0.000018000  |
| 6 | -0.577318000 | -1.220064000 | -0.000056000 |
| 6 | -1.817595000 | 1.275742000  | -0.000025000 |
| 1 | 0.157669000  | 2.103818000  | 0.000073000  |
| 6 | -1.964098000 | -1.134511000 | -0.000101000 |
| 1 | -0.073348000 | -2.180810000 | -0.000061000 |
| 6 | -2.586341000 | 0.114126000  | -0.000087000 |
| 1 | -2.299538000 | 2.248100000  | -0.000010000 |
| 1 | -2.562067000 | -2.040381000 | -0.000146000 |
| 1 | -3.669907000 | 0.181945000  | -0.000124000 |
| 6 | 2.550811000  | 1.046880000  | 0.000041000  |
| 1 | 3.600758000  | 0.754945000  | -0.000137000 |
| 1 | 2.342089000  | 1.658461000  | -0.883735000 |
| 1 | 2.342340000  | 1.658205000  | 0.884060000  |

**R-PhCHOHMe**

Coordinates (Angstroms)

|   | X            | Y            | Z            |
|---|--------------|--------------|--------------|
| 1 | -1.848087000 | -1.272051000 | -0.797469000 |
| 1 | -1.887846000 | 0.873247000  | -1.747889000 |
| 6 | -1.654644000 | -0.345057000 | -0.236133000 |
| 8 | -2.293204000 | 0.747545000  | -0.884604000 |
| 6 | -0.151238000 | -0.154459000 | -0.139673000 |
| 6 | 0.711986000  | -1.237590000 | -0.312268000 |
| 6 | 0.387773000  | 1.099718000  | 0.160246000  |
| 6 | 2.089973000  | -1.076895000 | -0.179740000 |
| 1 | 0.302424000  | -2.216207000 | -0.552044000 |
| 6 | 1.764294000  | 1.264601000  | 0.287072000  |
| 1 | -0.281614000 | 1.945552000  | 0.288209000  |
| 6 | 2.619616000  | 0.176021000  | 0.119795000  |
| 1 | 2.749756000  | -1.928159000 | -0.317240000 |

|   |              |              |             |
|---|--------------|--------------|-------------|
| 1 | 2.172155000  | 2.244156000  | 0.517355000 |
| 1 | 3.692628000  | 0.305495000  | 0.220350000 |
| 6 | -2.298408000 | -0.467669000 | 1.139060000 |
| 1 | -3.376014000 | -0.619236000 | 1.035329000 |
| 1 | -1.868776000 | -1.311601000 | 1.685466000 |
| 1 | -2.125104000 | 0.446430000  | 1.714607000 |

### S-PhCHOHMe

| Coordinates (Angstroms) |              |              |              |
|-------------------------|--------------|--------------|--------------|
|                         | X            | Y            | Z            |
| 1                       | 1.848087000  | -1.272044000 | -0.797480000 |
| 1                       | 1.887839000  | 0.873272000  | -1.747874000 |
| 6                       | 1.654644000  | -0.345055000 | -0.236136000 |
| 8                       | 2.293206000  | 0.747552000  | -0.884596000 |
| 6                       | 0.151238000  | -0.154456000 | -0.139675000 |
| 6                       | -0.711984000 | -1.237588000 | -0.312272000 |
| 6                       | -0.387774000 | 1.099718000  | 0.160248000  |
| 6                       | -2.089971000 | -1.076896000 | -0.179743000 |
| 1                       | -0.302422000 | -2.216204000 | -0.552053000 |
| 6                       | -1.764295000 | 1.264600000  | 0.287075000  |
| 1                       | 0.281611000  | 1.945553000  | 0.288214000  |
| 6                       | -2.619616000 | 0.176019000  | 0.119797000  |
| 1                       | -2.749753000 | -1.928161000 | -0.317245000 |
| 1                       | -2.172157000 | 2.244154000  | 0.517362000  |
| 1                       | -3.692628000 | 0.305491000  | 0.220353000  |
| 6                       | 2.298406000  | -0.467680000 | 1.139057000  |
| 1                       | 3.376012000  | -0.619242000 | 1.035326000  |
| 1                       | 2.125097000  | 0.446411000  | 1.714615000  |
| 1                       | 1.868776000  | -1.311620000 | 1.685452000  |

### Al<sub>X=Cl</sub>

| Coordinates (Angstroms) |              |              |              |
|-------------------------|--------------|--------------|--------------|
|                         | X            | Y            | Z            |
| 25                      | 0.198778000  | -0.209731000 | -0.043116000 |
| 7                       | 0.513693000  | 1.653791000  | -0.156640000 |
| 6                       | -0.078911000 | -1.142338000 | 1.394098000  |
| 8                       | -0.196768000 | -1.657451000 | 2.458632000  |
| 6                       | -1.853143000 | 2.162409000  | 0.039205000  |
| 6                       | 1.862348000  | 2.151621000  | -0.107138000 |
| 6                       | -0.474411000 | 2.696013000  | -0.339630000 |
| 1                       | -2.655550000 | 2.805618000  | -0.332795000 |
| 1                       | -1.924100000 | 2.082757000  | 1.126503000  |



|    |              |              |              |
|----|--------------|--------------|--------------|
| 1  | -0.269764000 | 3.577138000  | 0.295075000  |
| 1  | -0.488897000 | 3.064924000  | -1.382291000 |
| 1  | 2.028258000  | 2.860114000  | 0.727707000  |
| 1  | 2.140369000  | 2.707334000  | -1.022667000 |
| 6  | 2.811969000  | 0.996437000  | 0.046711000  |
| 6  | 4.196571000  | 1.157595000  | 0.123301000  |
| 1  | 4.622233000  | 2.155083000  | 0.070786000  |
| 6  | 3.022442000  | -1.301564000 | 0.234349000  |
| 1  | 2.505718000  | -2.254534000 | 0.267742000  |
| 6  | 5.004860000  | 0.037816000  | 0.261246000  |
| 1  | 6.083796000  | 0.140933000  | 0.324922000  |
| 6  | 4.403355000  | -1.220601000 | 0.318716000  |
| 1  | 4.991089000  | -2.125727000 | 0.426617000  |
| 7  | 2.235165000  | -0.218568000 | 0.103346000  |
| 16 | -1.983170000 | 0.482042000  | -0.661913000 |
| 6  | -3.473633000 | -0.243665000 | 0.183368000  |
| 6  | -3.427132000 | -1.737864000 | -0.148570000 |
| 6  | -4.735553000 | 0.392678000  | -0.405690000 |
| 1  | -2.539394000 | -2.212830000 | 0.280058000  |
| 1  | -4.317138000 | -2.225643000 | 0.265519000  |
| 1  | -3.419131000 | -1.910476000 | -1.230354000 |
| 1  | -4.761728000 | 1.473378000  | -0.229397000 |
| 1  | -4.806323000 | 0.216069000  | -1.483737000 |
| 1  | -5.621985000 | -0.044104000 | 0.070408000  |
| 6  | -3.434530000 | -0.039509000 | 1.697910000  |
| 1  | -4.239729000 | -0.626983000 | 2.155339000  |
| 1  | -2.485014000 | -0.371747000 | 2.124652000  |
| 1  | -3.598109000 | 1.006306000  | 1.974173000  |
| 17 | 0.288436000  | -1.942832000 | -1.873117000 |

A2<sub>X=Cl</sub>

| -----                   |              |              |              |
|-------------------------|--------------|--------------|--------------|
| Coordinates (Angstroms) |              |              |              |
|                         | X            | Y            | Z            |
| -----                   |              |              |              |
| 25                      | -0.140630000 | -0.343891000 | -0.020710000 |
| 7                       | -0.480976000 | 1.657572000  | -0.410469000 |
| 6                       | 0.089822000  | -2.062037000 | 0.303382000  |
| 8                       | 0.228015000  | -3.208888000 | 0.531726000  |
| 6                       | 1.889380000  | 2.112889000  | -0.198164000 |
| 6                       | -1.822270000 | 2.004503000  | -0.030006000 |
| 6                       | 0.477637000  | 2.580608000  | 0.133535000  |
| 1                       | 2.649359000  | 2.758441000  | 0.249947000  |
| 1                       | 2.031775000  | 2.089119000  | -1.283278000 |
| 1                       | 0.365058000  | 3.605396000  | -0.275555000 |

|    |              |              |              |
|----|--------------|--------------|--------------|
| 1  | 0.388964000  | 2.686833000  | 1.238115000  |
| 1  | -2.208018000 | 2.921440000  | -0.517798000 |
| 1  | -1.919113000 | 2.185473000  | 1.064170000  |
| 6  | -2.743833000 | 0.860808000  | -0.348483000 |
| 6  | -4.113417000 | 1.022365000  | -0.565840000 |
| 1  | -4.544033000 | 2.018414000  | -0.534681000 |
| 6  | -2.932843000 | -1.429070000 | -0.629416000 |
| 1  | -2.422250000 | -2.386189000 | -0.648491000 |
| 6  | -4.904193000 | -0.091056000 | -0.817644000 |
| 1  | -5.971106000 | 0.016876000  | -0.988083000 |
| 6  | -4.299468000 | -1.346641000 | -0.852307000 |
| 1  | -4.869776000 | -2.248208000 | -1.047745000 |
| 7  | -2.163780000 | -0.356296000 | -0.379305000 |
| 16 | 2.052397000  | 0.411749000  | 0.457842000  |
| 6  | 3.459000000  | -0.297213000 | -0.531640000 |
| 6  | 3.797704000  | -1.623752000 | 0.154320000  |
| 6  | 4.657444000  | 0.652269000  | -0.455393000 |
| 1  | 2.937694000  | -2.300638000 | 0.162686000  |
| 1  | 4.610774000  | -2.117923000 | -0.390403000 |
| 1  | 4.125863000  | -1.468622000 | 1.187454000  |
| 1  | 4.468117000  | 1.591719000  | -0.983976000 |
| 1  | 4.918441000  | 0.884440000  | 0.582572000  |
| 1  | 5.525896000  | 0.176146000  | -0.926027000 |
| 6  | 3.068260000  | -0.549450000 | -1.987450000 |
| 1  | 3.949291000  | -0.895704000 | -2.541439000 |
| 1  | 2.296204000  | -1.319661000 | -2.059346000 |
| 1  | 2.699135000  | 0.356469000  | -2.479183000 |
| 17 | -0.685609000 | -0.000336000 | 2.524304000  |
| 1  | 0.089964000  | -0.888015000 | -1.630926000 |
| 1  | 0.160332000  | -0.093956000 | -1.673655000 |

---

### A3<sub>x=Cl</sub>

| -----                   |              |              |              |
|-------------------------|--------------|--------------|--------------|
| Coordinates (Angstroms) |              |              |              |
|                         | X            | Y            | Z            |
| 25                      | -1.144366000 | 0.809702000  | -0.214652000 |
| 1                       | -0.784843000 | -0.224810000 | -1.506119000 |
| 7                       | -0.189514000 | -0.218002000 | 1.312781000  |
| 6                       | -1.904017000 | 1.719261000  | -1.522101000 |
| 8                       | -2.406170000 | 2.340016000  | -2.385145000 |
| 6                       | -2.254529000 | -1.405576000 | 1.782266000  |
| 6                       | 0.892837000  | 0.583098000  | 1.832881000  |
| 6                       | -1.046644000 | -0.693633000 | 2.376730000  |
| 1                       | -2.949592000 | -1.738764000 | 2.557141000  |

---

|    |              |              |              |
|----|--------------|--------------|--------------|
| 1  | -1.925032000 | -2.268947000 | 1.196801000  |
| 1  | -0.527688000 | -1.411016000 | 3.041495000  |
| 1  | -1.394780000 | 0.134747000  | 3.023218000  |
| 1  | 1.661206000  | -0.011575000 | 2.361405000  |
| 1  | 0.530687000  | 1.339540000  | 2.554811000  |
| 6  | 1.547122000  | 1.330573000  | 0.707081000  |
| 6  | 2.848280000  | 1.828065000  | 0.790778000  |
| 1  | 3.428214000  | 1.648122000  | 1.690448000  |
| 6  | 1.311633000  | 2.191289000  | -1.425911000 |
| 1  | 0.665946000  | 2.313883000  | -2.289120000 |
| 6  | 3.381475000  | 2.531680000  | -0.278915000 |
| 1  | 4.392753000  | 2.924276000  | -0.233375000 |
| 6  | 2.597624000  | 2.710123000  | -1.418533000 |
| 1  | 2.970403000  | 3.242460000  | -2.286728000 |
| 7  | 0.784170000  | 1.521862000  | -0.387022000 |
| 16 | -3.084987000 | -0.211813000 | 0.671077000  |
| 6  | -4.098629000 | -1.301383000 | -0.446113000 |
| 6  | -4.962086000 | -0.339967000 | -1.267808000 |
| 6  | -4.988309000 | -2.202163000 | 0.414964000  |
| 1  | -4.345531000 | 0.326471000  | -1.878801000 |
| 1  | -5.603986000 | -0.919729000 | -1.941176000 |
| 1  | -5.606081000 | 0.272810000  | -0.628044000 |
| 1  | -4.400894000 | -2.924906000 | 0.989776000  |
| 1  | -5.596824000 | -1.616091000 | 1.111683000  |
| 1  | -5.665261000 | -2.768769000 | -0.235186000 |
| 6  | -3.231925000 | -2.144042000 | -1.381299000 |
| 1  | -3.880782000 | -2.793997000 | -1.980938000 |
| 1  | -2.658138000 | -1.514264000 | -2.065545000 |
| 1  | -2.534823000 | -2.786441000 | -0.834490000 |
| 1  | -0.821881000 | -0.709612000 | -0.866385000 |
| 1  | 1.276767000  | -1.203636000 | -1.451720000 |
| 1  | 0.439356000  | -1.480205000 | 0.640226000  |
| 6  | 1.678215000  | -2.040444000 | -0.855882000 |
| 8  | 0.811064000  | -2.353497000 | 0.193968000  |
| 6  | 3.062073000  | -1.601274000 | -0.384528000 |
| 6  | 3.941168000  | -0.979067000 | -1.279013000 |
| 6  | 3.482558000  | -1.811219000 | 0.929486000  |
| 6  | 5.210077000  | -0.574726000 | -0.870642000 |
| 1  | 3.621409000  | -0.793342000 | -2.302657000 |
| 6  | 4.752391000  | -1.405615000 | 1.344882000  |
| 1  | 2.796820000  | -2.281347000 | 1.627783000  |
| 6  | 5.620968000  | -0.785819000 | 0.447383000  |
| 1  | 5.874836000  | -0.083784000 | -1.576344000 |
| 1  | 5.060397000  | -1.570176000 | 2.374092000  |

|    |              |              |              |
|----|--------------|--------------|--------------|
| 1  | 6.606995000  | -0.464538000 | 0.771275000  |
| 6  | 1.782442000  | -3.256567000 | -1.777176000 |
| 1  | 0.789636000  | -3.517592000 | -2.158264000 |
| 1  | 2.440367000  | -3.058729000 | -2.630108000 |
| 1  | 2.180249000  | -4.115802000 | -1.225076000 |
| 17 | -1.600531000 | 2.827498000  | 1.383348000  |

**TSA3-4<sub>X=Cl</sub>**

| -----                   |              |              |              |
|-------------------------|--------------|--------------|--------------|
| Coordinates (Angstroms) |              |              |              |
|                         | X            | Y            | Z            |
| 25                      | -1.157110000 | 0.840058000  | -0.198801000 |
| 1                       | -0.793218000 | -0.140430000 | -1.535404000 |
| 7                       | -0.170527000 | -0.232049000 | 1.288991000  |
| 6                       | -1.919559000 | 1.795403000  | -1.472680000 |
| 8                       | -2.403438000 | 2.453834000  | -2.316851000 |
| 6                       | -2.223208000 | -1.450724000 | 1.741842000  |
| 6                       | 0.914671000  | 0.570191000  | 1.816124000  |
| 6                       | -1.023110000 | -0.737820000 | 2.350082000  |
| 1                       | -2.908831000 | -1.810122000 | 2.513216000  |
| 1                       | -1.882811000 | -2.296519000 | 1.137791000  |
| 1                       | -0.489957000 | -1.460404000 | 2.994564000  |
| 1                       | -1.371206000 | 0.078938000  | 3.004608000  |
| 1                       | 1.687306000  | -0.033776000 | 2.322764000  |
| 1                       | 0.544469000  | 1.303148000  | 2.552402000  |
| 6                       | 1.550591000  | 1.342293000  | 0.695965000  |
| 6                       | 2.863347000  | 1.810538000  | 0.755978000  |
| 1                       | 3.467602000  | 1.588580000  | 1.629866000  |
| 6                       | 1.270932000  | 2.268955000  | -1.403598000 |
| 1                       | 0.603426000  | 2.428821000  | -2.243679000 |
| 6                       | 3.380385000  | 2.532396000  | -0.309945000 |
| 1                       | 4.401874000  | 2.899506000  | -0.284909000 |
| 6                       | 2.567043000  | 2.761984000  | -1.418996000 |
| 1                       | 2.925277000  | 3.311892000  | -2.282326000 |
| 7                       | 0.761102000  | 1.577989000  | -0.370301000 |
| 16                      | -3.078531000 | -0.248554000 | 0.658263000  |
| 6                       | -4.071497000 | -1.334151000 | -0.480490000 |
| 6                       | -4.945938000 | -0.371463000 | -1.289139000 |
| 6                       | -4.950978000 | -2.259784000 | 0.364711000  |
| 1                       | -4.337094000 | 0.308256000  | -1.893143000 |
| 1                       | -5.582903000 | -0.949455000 | -1.968615000 |
| 1                       | -5.595102000 | 0.227535000  | -0.641661000 |
| 1                       | -4.354877000 | -2.981061000 | 0.932370000  |
| 1                       | -5.570264000 | -1.691769000 | 1.066832000  |

|    |              |              |              |
|----|--------------|--------------|--------------|
| 1  | -5.617050000 | -2.828023000 | -0.295122000 |
| 6  | -3.190735000 | -2.149867000 | -1.426199000 |
| 1  | -3.829456000 | -2.798842000 | -2.037680000 |
| 1  | -2.623553000 | -1.502283000 | -2.099226000 |
| 1  | -2.486362000 | -2.791455000 | -0.888156000 |
| 1  | -0.799578000 | -0.653523000 | -0.919090000 |
| 1  | 1.290027000  | -1.142452000 | -1.447523000 |
| 1  | 0.381283000  | -1.321337000 | 0.686433000  |
| 6  | 1.659069000  | -1.995713000 | -0.846938000 |
| 8  | 0.795582000  | -2.275975000 | 0.200923000  |
| 6  | 3.063064000  | -1.595091000 | -0.390466000 |
| 6  | 3.956660000  | -0.999282000 | -1.289077000 |
| 6  | 3.482378000  | -1.808237000 | 0.923407000  |
| 6  | 5.235221000  | -0.621571000 | -0.884872000 |
| 1  | 3.640166000  | -0.811260000 | -2.313529000 |
| 6  | 4.762373000  | -1.431398000 | 1.335284000  |
| 1  | 2.782539000  | -2.256125000 | 1.622598000  |
| 6  | 5.643635000  | -0.835448000 | 0.433767000  |
| 1  | 5.910758000  | -0.151146000 | -1.594497000 |
| 1  | 5.068579000  | -1.598283000 | 2.364834000  |
| 1  | 6.637756000  | -0.536087000 | 0.754147000  |
| 6  | 1.733532000  | -3.206320000 | -1.784554000 |
| 1  | 0.732283000  | -3.438566000 | -2.163196000 |
| 1  | 2.393148000  | -3.021636000 | -2.640181000 |
| 1  | 2.109027000  | -4.080660000 | -1.239839000 |
| 17 | -1.645143000 | 2.739419000  | 1.489325000  |

A4<sub>x=Cl</sub>

| -----                   |              |              |              |
|-------------------------|--------------|--------------|--------------|
| Coordinates (Angstroms) |              |              |              |
|                         | X            | Y            | Z            |
| 25                      | -1.106868000 | 0.898878000  | -0.223913000 |
| 1                       | -0.724652000 | -0.200919000 | -1.462326000 |
| 7                       | -0.139141000 | -0.028286000 | 1.401211000  |
| 6                       | -1.873423000 | 1.724464000  | -1.581062000 |
| 8                       | -2.384871000 | 2.295561000  | -2.469105000 |
| 6                       | -2.178958000 | -1.248952000 | 1.875061000  |
| 6                       | 0.961158000  | 0.816009000  | 1.850740000  |
| 6                       | -1.029061000 | -0.456896000 | 2.478503000  |
| 1                       | -2.880794000 | -1.570839000 | 2.647457000  |
| 1                       | -1.781527000 | -2.122501000 | 1.349349000  |
| 1                       | -0.502059000 | -1.094279000 | 3.204374000  |
| 1                       | -1.403073000 | 0.426324000  | 3.008758000  |
| 1                       | 1.711207000  | 0.257804000  | 2.427416000  |
| 1                       | 0.560090000  | 1.608099000  | 2.493796000  |

---

|    |              |              |              |
|----|--------------|--------------|--------------|
| 6  | 1.606681000  | 1.457505000  | 0.653584000  |
| 6  | 2.932258000  | 1.886186000  | 0.668326000  |
| 1  | 3.529716000  | 1.737824000  | 1.561666000  |
| 6  | 1.349689000  | 2.169534000  | -1.529088000 |
| 1  | 0.687025000  | 2.260637000  | -2.382817000 |
| 6  | 3.469329000  | 2.476927000  | -0.467029000 |
| 1  | 4.502598000  | 2.809621000  | -0.479838000 |
| 6  | 2.661036000  | 2.616869000  | -1.593256000 |
| 1  | 3.035402000  | 3.062460000  | -2.508180000 |
| 7  | 0.820671000  | 1.604970000  | -0.431144000 |
| 16 | -3.031794000 | -0.169681000 | 0.665661000  |
| 6  | -3.911956000 | -1.397447000 | -0.423342000 |
| 6  | -4.839445000 | -0.552508000 | -1.301433000 |
| 6  | -4.737787000 | -2.335717000 | 0.461052000  |
| 1  | -4.272998000 | 0.168445000  | -1.899313000 |
| 1  | -5.381690000 | -1.210073000 | -1.990577000 |
| 1  | -5.575334000 | -0.005975000 | -0.702275000 |
| 1  | -4.103290000 | -3.000716000 | 1.055052000  |
| 1  | -5.388543000 | -1.775804000 | 1.140944000  |
| 1  | -5.371094000 | -2.964112000 | -0.176107000 |
| 6  | -2.942763000 | -2.193478000 | -1.298506000 |
| 1  | -3.489074000 | -3.010260000 | -1.785767000 |
| 1  | -2.512829000 | -1.562135000 | -2.080767000 |
| 1  | -2.115630000 | -2.625786000 | -0.725896000 |
| 1  | -0.646677000 | -0.662919000 | -0.810718000 |
| 1  | 1.214557000  | -1.458447000 | -1.661393000 |
| 1  | 0.247796000  | -0.907574000 | 0.943918000  |
| 6  | 1.488863000  | -2.193493000 | -0.861435000 |
| 8  | 0.539282000  | -2.275996000 | 0.111298000  |
| 6  | 2.860597000  | -1.712442000 | -0.356836000 |
| 6  | 3.821510000  | -1.199505000 | -1.236963000 |
| 6  | 3.183540000  | -1.791652000 | 0.999249000  |
| 6  | 5.071886000  | -0.787034000 | -0.778581000 |
| 1  | 3.582453000  | -1.110404000 | -2.295625000 |
| 6  | 4.432941000  | -1.380683000 | 1.467634000  |
| 1  | 2.425200000  | -2.168488000 | 1.680255000  |
| 6  | 5.384537000  | -0.877742000 | 0.579821000  |
| 1  | 5.799980000  | -0.385215000 | -1.478771000 |
| 1  | 4.661802000  | -1.448101000 | 2.528485000  |
| 1  | 6.355287000  | -0.550309000 | 0.942177000  |
| 6  | 1.683278000  | -3.541854000 | -1.590252000 |
| 1  | 0.727072000  | -3.862430000 | -2.019839000 |
| 1  | 2.424926000  | -3.484850000 | -2.397988000 |
| 1  | 2.009566000  | -4.305574000 | -0.872712000 |

---

|    |              |             |             |
|----|--------------|-------------|-------------|
| 17 | -1.618499000 | 2.902212000 | 1.274669000 |
|----|--------------|-------------|-------------|

**TSA4-5<sub>X=Cl</sub>**

---

| Coordinates (Angstroms) |              |              |              |
|-------------------------|--------------|--------------|--------------|
|                         | X            | Y            | Z            |
| 25                      | 1.058122000  | -0.868168000 | -0.264045000 |
| 1                       | 0.721633000  | 0.464202000  | -1.286085000 |
| 7                       | 0.118062000  | -0.024135000 | 1.445270000  |
| 6                       | 1.762724000  | -1.576035000 | -1.704642000 |
| 8                       | 2.223039000  | -2.052037000 | -2.679355000 |
| 6                       | 2.189037000  | 1.149312000  | 1.941104000  |
| 6                       | -0.976505000 | -0.892958000 | 1.864548000  |
| 6                       | 1.025523000  | 0.361250000  | 2.525506000  |
| 1                       | 2.897066000  | 1.427825000  | 2.724747000  |
| 1                       | 1.818494000  | 2.054944000  | 1.451458000  |
| 1                       | 0.517255000  | 0.978177000  | 3.280965000  |
| 1                       | 1.387952000  | -0.548030000 | 3.017123000  |
| 1                       | -1.713559000 | -0.372687000 | 2.490778000  |
| 1                       | -0.554624000 | -1.720728000 | 2.444989000  |
| 6                       | -1.645253000 | -1.461738000 | 0.642502000  |
| 6                       | -2.966971000 | -1.902298000 | 0.667685000  |
| 1                       | -3.540808000 | -1.814006000 | 1.584385000  |
| 6                       | -1.441673000 | -2.036189000 | -1.583825000 |
| 1                       | -0.802453000 | -2.067261000 | -2.459449000 |
| 6                       | -3.529225000 | -2.431658000 | -0.485961000 |
| 1                       | -4.558782000 | -2.775921000 | -0.491160000 |
| 6                       | -2.750539000 | -2.492797000 | -1.639689000 |
| 1                       | -3.145066000 | -2.887108000 | -2.569714000 |
| 7                       | -0.885395000 | -1.535920000 | -0.468389000 |
| 16                      | 3.013704000  | 0.094065000  | 0.692896000  |
| 6                       | 3.982625000  | 1.326506000  | -0.312625000 |
| 6                       | 4.883997000  | 0.473320000  | -1.210035000 |
| 6                       | 4.834674000  | 2.180789000  | 0.629747000  |
| 1                       | 4.292632000  | -0.190583000 | -1.848443000 |
| 1                       | 5.475410000  | 1.129725000  | -1.858891000 |
| 1                       | 5.576427000  | -0.137262000 | -0.620990000 |
| 1                       | 4.219466000  | 2.842276000  | 1.247860000  |
| 1                       | 5.451914000  | 1.561331000  | 1.289108000  |
| 1                       | 5.502683000  | 2.813024000  | 0.032909000  |
| 6                       | 3.080041000  | 2.213752000  | -1.168729000 |
| 1                       | 3.692396000  | 2.988786000  | -1.646049000 |
| 1                       | 2.586324000  | 1.633974000  | -1.952427000 |
| 1                       | 2.300156000  | 2.706648000  | -0.580638000 |

|    |              |              |              |
|----|--------------|--------------|--------------|
| 1  | 0.363280000  | 1.053656000  | -0.732099000 |
| 1  | -1.346790000 | 1.378981000  | -1.877522000 |
| 1  | -0.271861000 | 0.836690000  | 1.018479000  |
| 6  | -1.498794000 | 2.122066000  | -1.058966000 |
| 8  | -0.417032000 | 2.126788000  | -0.207945000 |
| 6  | -2.807755000 | 1.714148000  | -0.377286000 |
| 6  | -3.882801000 | 1.220156000  | -1.125616000 |
| 6  | -2.967528000 | 1.848344000  | 1.003946000  |
| 6  | -5.086536000 | 0.875025000  | -0.513537000 |
| 1  | -3.769165000 | 1.091308000  | -2.200482000 |
| 6  | -4.169049000 | 1.503037000  | 1.624235000  |
| 1  | -2.129384000 | 2.216279000  | 1.589311000  |
| 6  | -5.235207000 | 1.016162000  | 0.867599000  |
| 1  | -5.905485000 | 0.484050000  | -1.111688000 |
| 1  | -4.272677000 | 1.611213000  | 2.700949000  |
| 1  | -6.169663000 | 0.742175000  | 1.349393000  |
| 6  | -1.684254000 | 3.489412000  | -1.740461000 |
| 1  | -0.761716000 | 3.761074000  | -2.265443000 |
| 1  | -2.507055000 | 3.483879000  | -2.466258000 |
| 1  | -1.891718000 | 4.259817000  | -0.987470000 |
| 17 | 1.534678000  | -2.981326000 | 1.143198000  |

**A5**  $x=Cl$

| -----                   |              |              |              |
|-------------------------|--------------|--------------|--------------|
| Coordinates (Angstroms) |              |              |              |
|                         | X            | Y            | Z            |
| 25                      | 0.943140000  | -0.949942000 | -0.313569000 |
| 1                       | 0.527892000  | 0.378853000  | -1.224994000 |
| 7                       | -0.028344000 | -0.050692000 | 1.391149000  |
| 1                       | -0.445282000 | 0.801678000  | 1.017877000  |
| 6                       | 1.650234000  | -1.677740000 | -1.727244000 |
| 8                       | 2.104737000  | -2.149983000 | -2.715106000 |
| 6                       | 2.069312000  | 1.100902000  | 1.892010000  |
| 6                       | -1.109133000 | -0.936770000 | 1.824295000  |
| 6                       | 0.885075000  | 0.339829000  | 2.471330000  |
| 1                       | 2.766022000  | 1.375152000  | 2.687819000  |
| 1                       | 1.725278000  | 2.010845000  | 1.390931000  |
| 1                       | 0.380579000  | 0.967595000  | 3.219536000  |
| 1                       | 1.228837000  | -0.574175000 | 2.965491000  |
| 1                       | -1.867879000 | -0.414448000 | 2.421562000  |
| 1                       | -0.666219000 | -1.725525000 | 2.440728000  |
| 6                       | -1.745770000 | -1.580906000 | 0.621974000  |
| 6                       | -3.047719000 | -2.074519000 | 0.664362000  |
| 1                       | -3.629368000 | -1.963265000 | 1.573684000  |



|    |              |              |              |
|----|--------------|--------------|--------------|
| 6  | -1.503890000 | -2.263291000 | -1.568156000 |
| 1  | -0.857519000 | -2.312399000 | -2.437654000 |
| 6  | -3.581038000 | -2.690178000 | -0.460665000 |
| 1  | -4.593451000 | -3.081901000 | -0.450159000 |
| 6  | -2.791941000 | -2.778473000 | -1.605170000 |
| 1  | -3.162167000 | -3.238171000 | -2.515101000 |
| 7  | -0.973568000 | -1.682573000 | -0.478627000 |
| 16 | 2.894782000  | 0.010691000  | 0.675995000  |
| 6  | 3.944553000  | 1.194833000  | -0.304779000 |
| 6  | 4.792582000  | 0.295138000  | -1.209054000 |
| 6  | 4.844572000  | 1.982606000  | 0.650431000  |
| 1  | 4.162929000  | -0.321892000 | -1.857851000 |
| 1  | 5.429903000  | 0.919433000  | -1.846166000 |
| 1  | 5.440336000  | -0.366256000 | -0.623645000 |
| 1  | 4.264949000  | 2.657790000  | 1.288154000  |
| 1  | 5.433568000  | 1.318469000  | 1.291930000  |
| 1  | 5.540089000  | 2.596662000  | 0.065704000  |
| 6  | 3.108228000  | 2.148797000  | -1.154181000 |
| 1  | 3.780539000  | 2.808778000  | -1.716570000 |
| 1  | 2.484429000  | 1.598733000  | -1.862557000 |
| 1  | 2.451928000  | 2.777832000  | -0.545595000 |
| 1  | -1.241815000 | 2.323890000  | -2.071909000 |
| 1  | 0.205596000  | 1.670163000  | -0.635630000 |
| 6  | -1.368531000 | 2.743225000  | -1.063301000 |
| 8  | -0.183735000 | 2.531257000  | -0.316246000 |
| 6  | -2.571538000 | 2.062392000  | -0.426789000 |
| 6  | -3.507746000 | 1.390471000  | -1.216685000 |
| 6  | -2.786638000 | 2.141154000  | 0.953056000  |
| 6  | -4.646947000 | 0.824113000  | -0.645212000 |
| 1  | -3.340062000 | 1.304023000  | -2.287859000 |
| 6  | -3.921760000 | 1.572788000  | 1.528949000  |
| 1  | -2.056520000 | 2.649108000  | 1.578418000  |
| 6  | -4.859531000 | 0.917497000  | 0.729573000  |
| 1  | -5.360678000 | 0.297178000  | -1.272351000 |
| 1  | -4.074857000 | 1.641241000  | 2.602535000  |
| 1  | -5.742008000 | 0.469863000  | 1.177708000  |
| 6  | -1.594600000 | 4.246453000  | -1.183778000 |
| 1  | -0.744614000 | 4.715710000  | -1.688986000 |
| 1  | -2.503379000 | 4.457956000  | -1.756756000 |
| 1  | -1.702053000 | 4.696703000  | -0.190335000 |
| 17 | 1.433454000  | -3.031142000 | 1.266041000  |

| -----                   |              |              |              |
|-------------------------|--------------|--------------|--------------|
| Coordinates (Angstroms) |              |              |              |
|                         | X            | Y            | Z            |
| -----                   |              |              |              |
| 25                      | 0.141055000  | 0.335454000  | 0.009547000  |
| 1                       | -0.093666000 | 0.234490000  | -1.669590000 |
| 7                       | 0.501153000  | -1.678736000 | -0.456902000 |
| 1                       | 0.149238000  | -0.651518000 | -1.364538000 |
| 6                       | -0.166874000 | 2.058450000  | 0.071659000  |
| 8                       | -0.377732000 | 3.220818000  | 0.062288000  |
| 6                       | -1.883388000 | -2.110826000 | -0.277192000 |
| 6                       | 1.857667000  | -2.021403000 | -0.127033000 |
| 6                       | -0.478780000 | -2.621786000 | 0.017203000  |
| 1                       | -2.640955000 | -2.786786000 | 0.126714000  |
| 1                       | -2.029499000 | -2.016413000 | -1.357715000 |
| 1                       | -0.375106000 | -3.612269000 | -0.463229000 |
| 1                       | -0.376490000 | -2.792233000 | 1.106987000  |
| 1                       | 2.242654000  | -2.892376000 | -0.687142000 |
| 1                       | 1.950478000  | -2.279348000 | 0.947298000  |
| 6                       | 2.762404000  | -0.842273000 | -0.365267000 |
| 6                       | 4.133443000  | -0.985649000 | -0.579248000 |
| 1                       | 4.566558000  | -1.980207000 | -0.619125000 |
| 6                       | 2.942802000  | 1.459537000  | -0.476537000 |
| 1                       | 2.429373000  | 2.413835000  | -0.434391000 |
| 6                       | 4.923781000  | 0.146025000  | -0.734109000 |
| 1                       | 5.993105000  | 0.054152000  | -0.897906000 |
| 6                       | 4.313819000  | 1.397698000  | -0.680516000 |
| 1                       | 4.882264000  | 2.313782000  | -0.798075000 |
| 7                       | 2.173644000  | 0.369606000  | -0.318024000 |
| 16                      | -2.044678000 | -0.455245000 | 0.490343000  |
| 6                       | -3.461485000 | 0.304818000  | -0.447840000 |
| 6                       | -3.790107000 | 1.594621000  | 0.310064000  |
| 6                       | -4.662133000 | -0.644341000 | -0.407134000 |
| 1                       | -2.932289000 | 2.273167000  | 0.336752000  |
| 1                       | -4.614497000 | 2.111298000  | -0.195307000 |
| 1                       | -4.099456000 | 1.386923000  | 1.339845000  |
| 1                       | -4.476953000 | -1.562052000 | -0.974087000 |
| 1                       | -4.920761000 | -0.917837000 | 0.621365000  |
| 1                       | -5.530620000 | -0.147368000 | -0.855584000 |
| 6                       | -3.083044000 | 0.630368000  | -1.892180000 |
| 1                       | -3.955232000 | 1.055729000  | -2.403729000 |
| 1                       | -2.269022000 | 1.358927000  | -1.931144000 |
| 1                       | -2.773097000 | -0.260174000 | -2.448365000 |
| 17                      | 0.700712000  | 0.047046000  | 2.528928000  |
| -----                   |              |              |              |

A6<sub>x=Cl</sub>

| -----                   |              |              |              |
|-------------------------|--------------|--------------|--------------|
| Coordinates (Angstroms) |              |              |              |
|                         | X            | Y            | Z            |
| -----                   |              |              |              |
| 25                      | 0.150396000  | 0.413868000  | -0.034399000 |
| 1                       | -0.067572000 | 0.647832000  | -1.671620000 |
| 7                       | 0.480219000  | -1.657252000 | -0.513787000 |
| 1                       | 0.376116000  | -1.665424000 | -1.525212000 |
| 6                       | -0.068303000 | 2.109112000  | 0.284007000  |
| 8                       | -0.199192000 | 3.275122000  | 0.461471000  |
| 6                       | -1.913816000 | -2.064055000 | -0.229251000 |
| 6                       | 1.863598000  | -2.003105000 | -0.183187000 |
| 6                       | -0.510597000 | -2.576272000 | 0.059078000  |
| 1                       | -2.655214000 | -2.720156000 | 0.233025000  |
| 1                       | -2.090045000 | -2.042865000 | -1.308787000 |
| 1                       | -0.405274000 | -3.591194000 | -0.349538000 |
| 1                       | -0.334909000 | -2.617961000 | 1.137872000  |
| 1                       | 2.226184000  | -2.875375000 | -0.741829000 |
| 1                       | 1.895463000  | -2.245209000 | 0.884282000  |
| 6                       | 2.763028000  | -0.816485000 | -0.409388000 |
| 6                       | 4.126957000  | -0.972480000 | -0.648839000 |
| 1                       | 4.545104000  | -1.970848000 | -0.731520000 |
| 6                       | 2.968976000  | 1.481010000  | -0.439358000 |
| 1                       | 2.468770000  | 2.439488000  | -0.356172000 |
| 6                       | 4.931292000  | 0.153978000  | -0.775432000 |
| 1                       | 5.996465000  | 0.054791000  | -0.959655000 |
| 6                       | 4.336919000  | 1.408429000  | -0.663028000 |
| 1                       | 4.915039000  | 2.321728000  | -0.752719000 |
| 7                       | 2.183110000  | 0.397516000  | -0.315432000 |
| 16                      | -2.057279000 | -0.366306000 | 0.442369000  |
| 6                       | -3.513478000 | 0.326263000  | -0.487680000 |
| 6                       | -3.676438000 | 1.746740000  | 0.061531000  |
| 6                       | -4.751831000 | -0.513723000 | -0.163746000 |
| 1                       | -2.798440000 | 2.359726000  | -0.162669000 |
| 1                       | -4.550791000 | 2.216570000  | -0.403500000 |
| 1                       | -3.831062000 | 1.744895000  | 1.146124000  |
| 1                       | -4.661939000 | -1.532899000 | -0.554234000 |
| 1                       | -4.925954000 | -0.570713000 | 0.915814000  |
| 1                       | -5.634340000 | -0.058087000 | -0.628864000 |
| 6                       | -3.278978000 | 0.378087000  | -1.995756000 |
| 1                       | -4.131338000 | 0.876234000  | -2.473770000 |
| 1                       | -2.368178000 | 0.933843000  | -2.231776000 |
| 1                       | -3.194817000 | -0.619959000 | -2.437593000 |
| 17                      | 0.686443000  | -0.288121000 | 2.494910000  |

-----  
**A7R<sub>X=Cl</sub>**  
-----

Coordinates (Angstroms)

|    | X            | Y            | Z            |
|----|--------------|--------------|--------------|
| 25 | -0.831515000 | -0.679389000 | 0.499020000  |
| 1  | -0.264539000 | 0.869845000  | 0.419185000  |
| 7  | -0.554948000 | -0.764183000 | -1.634292000 |
| 1  | -0.103851000 | 0.124691000  | -1.842643000 |
| 6  | -0.970101000 | -0.565665000 | 2.227112000  |
| 8  | -1.042756000 | -0.448518000 | 3.407248000  |
| 6  | -2.782267000 | 0.202624000  | -1.890453000 |
| 6  | 0.400318000  | -1.828085000 | -1.942516000 |
| 6  | -1.799489000 | -0.838949000 | -2.405698000 |
| 1  | -3.722183000 | 0.143022000  | -2.444620000 |
| 1  | -2.362730000 | 1.206185000  | -2.011760000 |
| 1  | -1.623910000 | -0.671708000 | -3.477992000 |
| 1  | -2.213109000 | -1.844191000 | -2.278426000 |
| 1  | 0.883770000  | -1.690485000 | -2.918467000 |
| 1  | -0.149467000 | -2.774886000 | -1.962478000 |
| 6  | 1.435134000  | -1.918209000 | -0.851907000 |
| 6  | 2.678237000  | -2.508747000 | -1.074306000 |
| 1  | 2.926834000  | -2.869780000 | -2.067648000 |
| 6  | 1.955828000  | -1.541631000 | 1.364641000  |
| 1  | 1.633545000  | -1.127762000 | 2.313787000  |
| 6  | 3.575087000  | -2.629605000 | -0.020573000 |
| 1  | 4.545904000  | -3.091995000 | -0.170038000 |
| 6  | 3.204154000  | -2.130922000 | 1.226232000  |
| 1  | 3.871966000  | -2.183840000 | 2.079274000  |
| 7  | 1.072708000  | -1.441653000 | 0.355748000  |
| 16 | -3.069973000 | -0.122394000 | -0.113533000 |
| 6  | -3.808552000 | 1.477097000  | 0.488192000  |
| 6  | -4.211431000 | 1.190914000  | 1.938126000  |
| 6  | -5.047667000 | 1.807105000  | -0.348428000 |
| 1  | -3.344616000 | 0.899395000  | 2.539292000  |
| 1  | -4.643733000 | 2.096159000  | 2.380183000  |
| 1  | -4.959960000 | 0.393484000  | 1.997042000  |
| 1  | -4.787888000 | 2.051436000  | -1.383692000 |
| 1  | -5.760743000 | 0.975977000  | -0.356950000 |
| 1  | -5.550669000 | 2.682126000  | 0.080515000  |
| 6  | -2.814867000 | 2.636965000  | 0.446876000  |
| 1  | -3.319020000 | 3.549889000  | 0.787834000  |
| 1  | -1.960004000 | 2.444324000  | 1.098641000  |
| 1  | -2.438403000 | 2.822757000  | -0.563952000 |

|    |              |              |              |
|----|--------------|--------------|--------------|
| 6  | 1.636018000  | 2.130811000  | -1.487828000 |
| 8  | 1.532759000  | 1.324530000  | -2.406990000 |
| 6  | 2.743703000  | 1.993659000  | -0.492939000 |
| 6  | 2.826916000  | 2.816798000  | 0.636577000  |
| 6  | 3.720844000  | 1.013038000  | -0.701568000 |
| 6  | 3.870431000  | 2.657660000  | 1.544795000  |
| 1  | 2.074446000  | 3.575838000  | 0.821795000  |
| 6  | 4.767288000  | 0.860163000  | 0.201473000  |
| 1  | 3.645704000  | 0.372925000  | -1.574562000 |
| 6  | 4.842413000  | 1.681251000  | 1.327639000  |
| 1  | 3.922432000  | 3.293182000  | 2.423514000  |
| 1  | 5.520238000  | 0.096069000  | 0.033846000  |
| 1  | 5.654606000  | 1.557521000  | 2.038077000  |
| 6  | 0.678929000  | 3.285711000  | -1.367370000 |
| 1  | -0.064378000 | 3.224690000  | -2.163499000 |
| 1  | 0.173094000  | 3.264716000  | -0.397982000 |
| 1  | 1.220919000  | 4.234933000  | -1.444977000 |
| 17 | -1.638042000 | -3.235330000 | 0.319234000  |

A7S<sub>X=Cl</sub>

| -----                   |              |              |              |
|-------------------------|--------------|--------------|--------------|
| Coordinates (Angstroms) |              |              |              |
|                         | X            | Y            | Z            |
| -----                   |              |              |              |
| 25                      | 0.880001000  | -0.980748000 | 0.376920000  |
| 1                       | -0.065881000 | 0.254852000  | 0.895213000  |
| 7                       | 0.788140000  | -0.066164000 | -1.563843000 |
| 1                       | 0.260207000  | 0.786544000  | -1.392204000 |
| 6                       | 0.958398000  | -1.637039000 | 1.983625000  |
| 8                       | 0.996104000  | -2.048325000 | 3.098134000  |
| 6                       | -1.264666000 | -1.305105000 | -1.992084000 |
| 6                       | 2.139662000  | 0.326984000  | -1.961539000 |
| 6                       | 0.065304000  | -0.846444000 | -2.571976000 |
| 1                       | -1.812599000 | -1.903882000 | -2.723528000 |
| 1                       | -1.873221000 | -0.437155000 | -1.716748000 |
| 1                       | -0.118823000 | -0.261019000 | -3.484244000 |
| 1                       | 0.683876000  | -1.709501000 | -2.837475000 |
| 1                       | 2.142562000  | 1.096428000  | -2.743911000 |
| 1                       | 2.644389000  | -0.564382000 | -2.348574000 |
| 6                       | 2.890682000  | 0.806732000  | -0.748204000 |
| 6                       | 3.936333000  | 1.722767000  | -0.845005000 |
| 1                       | 4.198573000  | 2.131861000  | -1.815692000 |
| 6                       | 3.167095000  | 0.656780000  | 1.537633000  |
| 1                       | 2.819879000  | 0.218460000  | 2.466822000  |
| 6                       | 4.620796000  | 2.102002000  | 0.303445000  |

|    |              |              |              |
|----|--------------|--------------|--------------|
| 1  | 5.437473000  | 2.815403000  | 0.251247000  |
| 6  | 4.225746000  | 1.553755000  | 1.521974000  |
| 1  | 4.722064000  | 1.816066000  | 2.450091000  |
| 7  | 2.502390000  | 0.280351000  | 0.431387000  |
| 16 | -0.914086000 | -2.293935000 | -0.492915000 |
| 6  | -2.553546000 | -2.294704000 | 0.391382000  |
| 6  | -2.366546000 | -3.280254000 | 1.548563000  |
| 6  | -3.639164000 | -2.800033000 | -0.562429000 |
| 1  | -1.553152000 | -2.965966000 | 2.210003000  |
| 1  | -3.289060000 | -3.323706000 | 2.139509000  |
| 1  | -2.148147000 | -4.290407000 | 1.185579000  |
| 1  | -3.838162000 | -2.083342000 | -1.365816000 |
| 1  | -3.366991000 | -3.760682000 | -1.012168000 |
| 1  | -4.574251000 | -2.937192000 | -0.006106000 |
| 6  | -2.924239000 | -0.915790000 | 0.933249000  |
| 1  | -3.906942000 | -0.974786000 | 1.417903000  |
| 1  | -2.190941000 | -0.567431000 | 1.663506000  |
| 1  | -2.988279000 | -0.167785000 | 0.138201000  |
| 6  | -0.316934000 | 3.014395000  | -0.137177000 |
| 8  | 0.205971000  | 2.942436000  | -1.244313000 |
| 6  | -1.788315000 | 2.772028000  | 0.006380000  |
| 6  | -2.432591000 | 2.832013000  | 1.247066000  |
| 6  | -2.535532000 | 2.475319000  | -1.140750000 |
| 6  | -3.804840000 | 2.609100000  | 1.336357000  |
| 1  | -1.870210000 | 3.045889000  | 2.150134000  |
| 6  | -3.905698000 | 2.253229000  | -1.051607000 |
| 1  | -2.029696000 | 2.420097000  | -2.099594000 |
| 6  | -4.542980000 | 2.322575000  | 0.188494000  |
| 1  | -4.296535000 | 2.655272000  | 2.303171000  |
| 1  | -4.476266000 | 2.022334000  | -1.946351000 |
| 1  | -5.612229000 | 2.146390000  | 0.261354000  |
| 6  | 0.498781000  | 3.372599000  | 1.074325000  |
| 1  | 1.548342000  | 3.460349000  | 0.788362000  |
| 1  | 0.153200000  | 4.324885000  | 1.492857000  |
| 1  | 0.394447000  | 2.607291000  | 1.847972000  |
| 17 | 2.494995000  | -2.807698000 | -0.763504000 |

**TSA7-8R<sub>X=Cl</sub>**

| -----                   |              |              |              |
|-------------------------|--------------|--------------|--------------|
| Coordinates (Angstroms) |              |              |              |
|                         | X            | Y            | Z            |
| -----                   |              |              |              |
| 25                      | -0.596996000 | -0.546090000 | 0.482598000  |
| 1                       | -0.158961000 | 0.963344000  | -0.166442000 |
| 7                       | -0.466720000 | -1.154246000 | -1.542820000 |

|    |              |              |              |
|----|--------------|--------------|--------------|
| 1  | -0.092530000 | -0.301062000 | -1.973695000 |
| 6  | -0.576189000 | 0.128382000  | 2.085704000  |
| 8  | -0.522110000 | 0.639796000  | 3.155092000  |
| 6  | -2.779669000 | -0.428015000 | -1.846579000 |
| 6  | 0.557839000  | -2.187474000 | -1.674922000 |
| 6  | -1.737282000 | -1.483908000 | -2.195004000 |
| 1  | -3.739494000 | -0.678879000 | -2.304672000 |
| 1  | -2.460130000 | 0.556015000  | -2.204320000 |
| 1  | -1.628461000 | -1.542331000 | -3.287434000 |
| 1  | -2.062817000 | -2.465012000 | -1.833065000 |
| 1  | 0.956240000  | -2.260422000 | -2.696024000 |
| 1  | 0.104072000  | -3.150750000 | -1.417035000 |
| 6  | 1.671033000  | -1.922793000 | -0.695819000 |
| 6  | 2.948781000  | -2.446218000 | -0.885264000 |
| 1  | 3.167572000  | -3.007459000 | -1.788547000 |
| 6  | 2.293248000  | -1.002830000 | 1.326751000  |
| 1  | 1.996869000  | -0.408507000 | 2.183577000  |
| 6  | 3.918358000  | -2.247849000 | 0.089863000  |
| 1  | 4.918204000  | -2.652369000 | -0.034381000 |
| 6  | 3.579430000  | -1.512818000 | 1.222971000  |
| 1  | 4.299615000  | -1.321190000 | 2.010813000  |
| 7  | 1.346712000  | -1.198985000 | 0.393857000  |
| 16 | -2.921617000 | -0.407316000 | -0.024741000 |
| 6  | -3.895766000 | 1.129209000  | 0.343977000  |
| 6  | -4.135659000 | 1.071819000  | 1.856087000  |
| 6  | -5.227410000 | 1.079942000  | -0.408447000 |
| 1  | -3.189592000 | 1.071967000  | 2.406536000  |
| 1  | -4.710726000 | 1.952201000  | 2.165637000  |
| 1  | -4.701429000 | 0.178329000  | 2.141248000  |
| 1  | -5.082810000 | 1.150018000  | -1.491431000 |
| 1  | -5.778958000 | 0.159238000  | -0.190637000 |
| 1  | -5.849033000 | 1.930196000  | -0.102593000 |
| 6  | -3.123032000 | 2.393532000  | -0.014242000 |
| 1  | -3.710451000 | 3.273493000  | 0.277241000  |
| 1  | -2.162256000 | 2.426017000  | 0.504742000  |
| 1  | -2.938569000 | 2.462155000  | -1.089904000 |
| 6  | 0.890557000  | 1.871740000  | -1.437830000 |
| 8  | 0.869313000  | 1.168991000  | -2.468839000 |
| 6  | 2.143436000  | 1.886498000  | -0.590830000 |
| 6  | 2.192639000  | 2.479916000  | 0.675775000  |
| 6  | 3.315006000  | 1.352525000  | -1.132548000 |
| 6  | 3.391050000  | 2.541028000  | 1.381375000  |
| 1  | 1.286616000  | 2.870932000  | 1.128351000  |
| 6  | 4.517800000  | 1.416559000  | -0.429615000 |

|    |              |              |              |
|----|--------------|--------------|--------------|
| 1  | 3.272073000  | 0.889881000  | -2.113483000 |
| 6  | 4.560632000  | 2.014147000  | 0.828503000  |
| 1  | 3.412662000  | 2.997536000  | 2.366844000  |
| 1  | 5.419763000  | 0.995269000  | -0.864761000 |
| 1  | 5.495845000  | 2.064263000  | 1.378862000  |
| 6  | 0.020868000  | 3.111778000  | -1.385438000 |
| 1  | -0.914595000 | 2.922886000  | -1.913109000 |
| 1  | -0.194549000 | 3.455196000  | -0.373195000 |
| 1  | 0.562286000  | 3.910530000  | -1.911400000 |
| 17 | -1.172782000 | -3.043582000 | 1.140535000  |

---

**TSA7-8S<sub>X=Cl</sub>**

---

Coordinates (Angstroms)

|    | X            | Y            | Z            |
|----|--------------|--------------|--------------|
| 25 | 0.806414000  | -0.739070000 | 0.379630000  |
| 1  | -0.169842000 | 0.679849000  | 0.430780000  |
| 7  | 0.955662000  | -0.215590000 | -1.670547000 |
| 1  | 0.528254000  | 0.717438000  | -1.656427000 |
| 6  | 0.611832000  | -0.950862000 | 2.096234000  |
| 8  | 0.446985000  | -1.032107000 | 3.268033000  |
| 6  | -1.169280000 | -1.365175000 | -2.027079000 |
| 6  | 2.362360000  | -0.026004000 | -2.015174000 |
| 6  | 0.208902000  | -1.063363000 | -2.603230000 |
| 1  | -1.731601000 | -2.008483000 | -2.708250000 |
| 1  | -1.727761000 | -0.437346000 | -1.866927000 |
| 1  | 0.094738000  | -0.583508000 | -3.585762000 |
| 1  | 0.768026000  | -1.994743000 | -2.743797000 |
| 1  | 2.498626000  | 0.586369000  | -2.916737000 |
| 1  | 2.804782000  | -1.011147000 | -2.199114000 |
| 6  | 3.075933000  | 0.595874000  | -0.843721000 |
| 6  | 4.258531000  | 1.315614000  | -1.003792000 |
| 1  | 4.656037000  | 1.475719000  | -2.001195000 |
| 6  | 3.166778000  | 0.860659000  | 1.446750000  |
| 1  | 2.692679000  | 0.667298000  | 2.402531000  |
| 6  | 4.912319000  | 1.812089000  | 0.117373000  |
| 1  | 5.837571000  | 2.370723000  | 0.015377000  |
| 6  | 4.353753000  | 1.575502000  | 1.371568000  |
| 1  | 4.820849000  | 1.941271000  | 2.279487000  |
| 7  | 2.528033000  | 0.376917000  | 0.368360000  |
| 16 | -0.905924000 | -2.200275000 | -0.422953000 |
| 6  | -2.584363000 | -2.190901000 | 0.372957000  |
| 6  | -2.444900000 | -3.136126000 | 1.570611000  |
| 6  | -3.623997000 | -2.732479000 | -0.610639000 |



|    |              |              |              |
|----|--------------|--------------|--------------|
| 1  | -1.664911000 | -2.794392000 | 2.258882000  |
| 1  | -3.392870000 | -3.164163000 | 2.120497000  |
| 1  | -2.205432000 | -4.157057000 | 1.254641000  |
| 1  | -3.792296000 | -2.041147000 | -1.442629000 |
| 1  | -3.327355000 | -3.704411000 | -1.019070000 |
| 1  | -4.580757000 | -2.860201000 | -0.090282000 |
| 6  | -2.969625000 | -0.794547000 | 0.848850000  |
| 1  | -3.952612000 | -0.833587000 | 1.334691000  |
| 1  | -2.237279000 | -0.410313000 | 1.563339000  |
| 1  | -3.032092000 | -0.090260000 | 0.015964000  |
| 6  | -0.282363000 | 2.441142000  | -0.130879000 |
| 8  | 0.252501000  | 2.494012000  | -1.258823000 |
| 6  | -1.793948000 | 2.420707000  | -0.061376000 |
| 6  | -2.496826000 | 2.600968000  | 1.134689000  |
| 6  | -2.515825000 | 2.276379000  | -1.250756000 |
| 6  | -3.890585000 | 2.625179000  | 1.141042000  |
| 1  | -1.964007000 | 2.710139000  | 2.073928000  |
| 6  | -3.908789000 | 2.293321000  | -1.246525000 |
| 1  | -1.969002000 | 2.151162000  | -2.180107000 |
| 6  | -4.602246000 | 2.468461000  | -0.048294000 |
| 1  | -4.420352000 | 2.761904000  | 2.079545000  |
| 1  | -4.452628000 | 2.172759000  | -2.179389000 |
| 1  | -5.688471000 | 2.483866000  | -0.041284000 |
| 6  | 0.469614000  | 2.999861000  | 1.060176000  |
| 1  | 1.539212000  | 2.884748000  | 0.884335000  |
| 1  | 0.242892000  | 4.072233000  | 1.135302000  |
| 1  | 0.208611000  | 2.520334000  | 2.004665000  |
| 17 | 2.420355000  | -2.788603000 | -0.048094000 |

**A8R<sub>x=Cl</sub>**

| -----                   |              |              |              |
|-------------------------|--------------|--------------|--------------|
| Coordinates (Angstroms) |              |              |              |
|                         | X            | Y            | Z            |
| -----                   |              |              |              |
| 25                      | 0.895719000  | -0.966572000 | -0.174154000 |
| 1                       | -0.404282000 | 1.447127000  | -0.902824000 |
| 7                       | 0.358334000  | -0.324336000 | 1.593327000  |
| 1                       | -0.038347000 | 1.334605000  | 1.198644000  |
| 6                       | 1.014410000  | -0.684443000 | -1.901221000 |
| 8                       | 0.984931000  | -0.379657000 | -3.045152000 |
| 6                       | 2.549200000  | 0.600265000  | 2.087814000  |
| 6                       | -0.896490000 | -0.828263000 | 2.099774000  |
| 6                       | 1.322336000  | -0.102195000 | 2.653481000  |
| 1                       | 3.376946000  | 0.599488000  | 2.801058000  |
| 1                       | 2.297432000  | 1.634420000  | 1.839056000  |

|    |              |              |              |
|----|--------------|--------------|--------------|
| 1  | 0.915617000  | 0.536410000  | 3.459229000  |
| 1  | 1.618515000  | -1.053622000 | 3.132473000  |
| 1  | -1.483733000 | -0.068835000 | 2.649279000  |
| 1  | -0.740028000 | -1.658590000 | 2.814737000  |
| 6  | -1.723001000 | -1.365500000 | 0.966728000  |
| 6  | -3.070659000 | -1.698300000 | 1.111420000  |
| 1  | -3.564439000 | -1.521413000 | 2.061808000  |
| 6  | -1.734707000 | -2.085601000 | -1.230157000 |
| 1  | -1.166595000 | -2.217676000 | -2.144392000 |
| 6  | -3.752084000 | -2.256921000 | 0.040614000  |
| 1  | -4.800865000 | -2.522383000 | 0.132105000  |
| 6  | -3.065312000 | -2.463062000 | -1.156074000 |
| 1  | -3.551626000 | -2.897971000 | -2.022386000 |
| 7  | -1.068541000 | -1.540803000 | -0.196193000 |
| 16 | 3.046811000  | -0.259007000 | 0.548269000  |
| 6  | 3.839183000  | 1.113593000  | -0.430009000 |
| 6  | 4.464733000  | 0.425734000  | -1.646413000 |
| 6  | 4.930196000  | 1.775655000  | 0.415369000  |
| 1  | 3.715057000  | -0.122178000 | -2.225522000 |
| 1  | 4.912388000  | 1.182658000  | -2.300771000 |
| 1  | 5.251422000  | -0.275273000 | -1.347736000 |
| 1  | 4.512802000  | 2.314697000  | 1.271512000  |
| 1  | 5.652037000  | 1.040412000  | 0.786507000  |
| 1  | 5.472409000  | 2.502145000  | -0.201365000 |
| 6  | 2.802164000  | 2.146032000  | -0.874992000 |
| 1  | 3.308842000  | 2.966330000  | -1.398767000 |
| 1  | 2.071407000  | 1.703178000  | -1.556171000 |
| 1  | 2.256381000  | 2.572411000  | -0.028579000 |
| 6  | -0.905579000 | 2.218682000  | -0.293883000 |
| 8  | -0.300744000 | 2.275627000  | 0.975128000  |
| 6  | -2.381211000 | 1.844848000  | -0.214719000 |
| 6  | -3.026320000 | 1.285867000  | -1.322761000 |
| 6  | -3.122816000 | 2.081959000  | 0.944868000  |
| 6  | -4.385890000 | 0.982076000  | -1.278537000 |
| 1  | -2.454983000 | 1.074911000  | -2.224559000 |
| 6  | -4.483878000 | 1.778026000  | 0.994168000  |
| 1  | -2.621229000 | 2.498405000  | 1.813160000  |
| 6  | -5.121473000 | 1.229924000  | -0.118530000 |
| 1  | -4.867777000 | 0.538080000  | -2.145349000 |
| 1  | -5.045161000 | 1.965402000  | 1.905759000  |
| 1  | -6.179884000 | 0.987966000  | -0.079598000 |
| 6  | -0.724624000 | 3.568411000  | -0.983168000 |
| 1  | 0.341009000  | 3.798046000  | -1.083500000 |
| 1  | -1.174670000 | 3.561022000  | -1.981159000 |

|    |              |              |              |
|----|--------------|--------------|--------------|
| 1  | -1.200916000 | 4.362094000  | -0.395852000 |
| 17 | 1.575248000  | -3.381527000 | -0.038097000 |

---

**A8S<sub>X=Cl</sub>**

---

Coordinates (Angstroms)

|    | X            | Y            | Z            |
|----|--------------|--------------|--------------|
| 25 | 1.165659000  | 0.773415000  | -0.343431000 |
| 1  | -0.597641000 | -1.160454000 | -0.333575000 |
| 7  | 1.153993000  | 0.255544000  | 1.578943000  |
| 1  | -0.007510000 | -0.936861000 | 1.640554000  |
| 6  | 0.757286000  | 0.825371000  | -2.050908000 |
| 8  | 0.438354000  | 0.787568000  | -3.189601000 |
| 6  | -0.459051000 | 1.975690000  | 2.129892000  |
| 6  | 2.324746000  | -0.500418000 | 1.961790000  |
| 6  | 0.787759000  | 1.230285000  | 2.584416000  |
| 1  | -0.703620000 | 2.803645000  | 2.799825000  |
| 1  | -1.305973000 | 1.284814000  | 2.089491000  |
| 1  | 0.564982000  | 0.759550000  | 3.559972000  |
| 1  | 1.603839000  | 1.954626000  | 2.770047000  |
| 1  | 2.158910000  | -1.155781000 | 2.836198000  |
| 1  | 3.164009000  | 0.167632000  | 2.236300000  |
| 6  | 2.768517000  | -1.336931000 | 0.795319000  |
| 6  | 3.561856000  | -2.476466000 | 0.934168000  |
| 1  | 3.869250000  | -2.794330000 | 1.925551000  |
| 6  | 2.717742000  | -1.599605000 | -1.501769000 |
| 1  | 2.355741000  | -1.218055000 | -2.450274000 |
| 6  | 3.939974000  | -3.187030000 | -0.197220000 |
| 1  | 4.553775000  | -4.078380000 | -0.110688000 |
| 6  | 3.508288000  | -2.737132000 | -1.444607000 |
| 1  | 3.772279000  | -3.257150000 | -2.358980000 |
| 7  | 2.347894000  | -0.907782000 | -0.410444000 |
| 16 | -0.130059000 | 2.605488000  | 0.442192000  |
| 6  | -1.836176000 | 2.777733000  | -0.280825000 |
| 6  | -1.631247000 | 3.487913000  | -1.622036000 |
| 6  | -2.697980000 | 3.638759000  | 0.645251000  |
| 1  | -0.983165000 | 2.908187000  | -2.285852000 |
| 1  | -2.601319000 | 3.611635000  | -2.117433000 |
| 1  | -1.189640000 | 4.481003000  | -1.486454000 |
| 1  | -2.881309000 | 3.146561000  | 1.605418000  |
| 1  | -2.231899000 | 4.611079000  | 0.836648000  |
| 1  | -3.671313000 | 3.814351000  | 0.171901000  |
| 6  | -2.477839000 | 1.408386000  | -0.499904000 |
| 1  | -3.468048000 | 1.533586000  | -0.955049000 |

|    |              |              |              |
|----|--------------|--------------|--------------|
| 1  | -1.867717000 | 0.792886000  | -1.166221000 |
| 1  | -2.614291000 | 0.864390000  | 0.439316000  |
| 6  | -0.989236000 | -1.974237000 | 0.306782000  |
| 8  | -0.670987000 | -1.708399000 | 1.646135000  |
| 6  | -2.494645000 | -2.010545000 | 0.091676000  |
| 6  | -3.015721000 | -2.017318000 | -1.208057000 |
| 6  | -3.382191000 | -2.025867000 | 1.168756000  |
| 6  | -4.391117000 | -2.037711000 | -1.426464000 |
| 1  | -2.335898000 | -1.988089000 | -2.057090000 |
| 6  | -4.762029000 | -2.050349000 | 0.954523000  |
| 1  | -2.979980000 | -2.002987000 | 2.176324000  |
| 6  | -5.272394000 | -2.055347000 | -0.342660000 |
| 1  | -4.777785000 | -2.032513000 | -2.441974000 |
| 1  | -5.439779000 | -2.060172000 | 1.804116000  |
| 1  | -6.345578000 | -2.068991000 | -0.510480000 |
| 6  | -0.332566000 | -3.279665000 | -0.154294000 |
| 1  | 0.749430000  | -3.222758000 | 0.000912000  |
| 1  | -0.721176000 | -4.125034000 | 0.425063000  |
| 1  | -0.519276000 | -3.471269000 | -1.216545000 |
| 17 | 3.234953000  | 2.200877000  | -0.424179000 |

---

**Al<sub>X=H</sub>**

---

Coordinates (Angstroms)

|    | X            | Y            | Z            |
|----|--------------|--------------|--------------|
| 25 | 0.222127000  | -0.295737000 | -0.391943000 |
| 7  | 0.542239000  | 1.508764000  | 0.105364000  |
| 6  | -0.072128000 | -1.840546000 | 0.358338000  |
| 8  | -0.224674000 | -2.847471000 | 0.978925000  |
| 6  | -1.822324000 | 2.018323000  | 0.362312000  |
| 6  | 1.895522000  | 1.975715000  | 0.260252000  |
| 6  | -0.424262000 | 2.587202000  | 0.145428000  |
| 1  | -2.598339000 | 2.751126000  | 0.125618000  |
| 1  | -1.929301000 | 1.701713000  | 1.402691000  |
| 1  | -0.217497000 | 3.294150000  | 0.968944000  |
| 1  | -0.405356000 | 3.186117000  | -0.785004000 |
| 1  | 2.069852000  | 2.465806000  | 1.237141000  |
| 1  | 2.171211000  | 2.731807000  | -0.499995000 |
| 6  | 2.839841000  | 0.815984000  | 0.123823000  |
| 6  | 4.220391000  | 0.935187000  | 0.296579000  |
| 1  | 4.645579000  | 1.902120000  | 0.547879000  |
| 6  | 3.047134000  | -1.440711000 | -0.339783000 |
| 1  | 2.533841000  | -2.361819000 | -0.594828000 |
| 6  | 5.025757000  | -0.184180000 | 0.141559000  |

|    |              |              |              |
|----|--------------|--------------|--------------|
| 1  | 6.101224000  | -0.113687000 | 0.272238000  |
| 6  | 4.422960000  | -1.400796000 | -0.184104000 |
| 1  | 5.006048000  | -2.305604000 | -0.317731000 |
| 7  | 2.259266000  | -0.358116000 | -0.189177000 |
| 16 | -1.981280000 | 0.541940000  | -0.703675000 |
| 6  | -3.422237000 | -0.366335000 | 0.046993000  |
| 6  | -3.524244000 | -1.662795000 | -0.761837000 |
| 6  | -4.691536000 | 0.471570000  | -0.126131000 |
| 1  | -2.612391000 | -2.259617000 | -0.663504000 |
| 1  | -4.370027000 | -2.254943000 | -0.393905000 |
| 1  | -3.690685000 | -1.460570000 | -1.825670000 |
| 1  | -4.629144000 | 1.418697000  | 0.420261000  |
| 1  | -4.882804000 | 0.693243000  | -1.181213000 |
| 1  | -5.552407000 | -0.082172000 | 0.267903000  |
| 6  | -3.190750000 | -0.686463000 | 1.524262000  |
| 1  | -3.993522000 | -1.345382000 | 1.876974000  |
| 1  | -2.235360000 | -1.194628000 | 1.675432000  |
| 1  | -3.209790000 | 0.211672000  | 2.149131000  |
| 1  | 0.308291000  | -0.863336000 | -1.955848000 |

A2<sub>X=H</sub>

| -----                   |              |              |              |
|-------------------------|--------------|--------------|--------------|
| Coordinates (Angstroms) |              |              |              |
|                         | X            | Y            | Z            |
| -----                   |              |              |              |
| 25                      | -0.203597000 | 0.362794000  | -0.306406000 |
| 7                       | -0.530770000 | -1.660123000 | 0.097632000  |
| 6                       | 0.002373000  | 2.055323000  | -0.698354000 |
| 8                       | 0.119517000  | 3.195874000  | -1.000897000 |
| 6                       | 1.846783000  | -2.099576000 | -0.139594000 |
| 6                       | -1.859464000 | -1.990473000 | -0.334345000 |
| 6                       | 0.433619000  | -2.543227000 | -0.496798000 |
| 1                       | 2.603287000  | -2.712775000 | -0.636733000 |
| 1                       | 1.992475000  | -2.163885000 | 0.942912000  |
| 1                       | 0.324802000  | -3.594484000 | -0.158615000 |
| 1                       | 0.343545000  | -2.576293000 | -1.608549000 |
| 1                       | -2.254772000 | -2.939225000 | 0.079698000  |
| 1                       | -1.921749000 | -2.104147000 | -1.445961000 |
| 6                       | -2.795289000 | -0.871141000 | 0.025478000  |
| 6                       | -4.152082000 | -1.056786000 | 0.291994000  |
| 1                       | -4.567657000 | -2.059471000 | 0.268885000  |
| 6                       | -3.007370000 | 1.412777000  | 0.332150000  |
| 1                       | -2.510062000 | 2.377323000  | 0.337273000  |
| 6                       | -4.950655000 | 0.042280000  | 0.584697000  |
| 1                       | -6.008481000 | -0.083832000 | 0.794738000  |

|    |              |              |              |
|----|--------------|--------------|--------------|
| 6  | -4.363536000 | 1.306070000  | 0.607106000  |
| 1  | -4.939647000 | 2.196739000  | 0.833870000  |
| 7  | -2.230761000 | 0.354878000  | 0.044014000  |
| 16 | 2.026095000  | -0.351619000 | -0.658187000 |
| 6  | 3.357210000  | 0.284392000  | 0.480080000  |
| 6  | 3.676866000  | 1.693108000  | -0.029460000 |
| 6  | 4.590706000  | -0.614340000 | 0.357548000  |
| 1  | 2.789331000  | 2.333928000  | -0.005882000 |
| 1  | 4.439896000  | 2.147570000  | 0.613462000  |
| 1  | 4.063414000  | 1.673772000  | -1.054034000 |
| 1  | 4.410667000  | -1.609484000 | 0.776720000  |
| 1  | 4.901127000  | -0.729916000 | -0.686283000 |
| 1  | 5.423757000  | -0.166620000 | 0.912791000  |
| 6  | 2.896514000  | 0.359035000  | 1.935627000  |
| 1  | 3.746426000  | 0.647019000  | 2.566652000  |
| 1  | 2.111441000  | 1.107889000  | 2.064170000  |
| 1  | 2.520909000  | -0.600332000 | 2.305859000  |
| 1  | -0.464487000 | 0.017808000  | -1.925062000 |
| 1  | -0.036455000 | 0.944474000  | 1.328436000  |
| 1  | 0.025157000  | 0.155057000  | 1.405679000  |

### A3<sub>X=H</sub>

| -----                   |              |              |              |
|-------------------------|--------------|--------------|--------------|
| Coordinates (Angstroms) |              |              |              |
|                         | X            | Y            | Z            |
| -----                   |              |              |              |
| 25                      | 1.225374000  | 1.154096000  | -0.176748000 |
| 1                       | 0.964862000  | 0.461879000  | 1.376801000  |
| 7                       | 0.247066000  | -0.254327000 | -1.377676000 |
| 6                       | 1.990954000  | 2.413385000  | 0.763625000  |
| 8                       | 2.504478000  | 3.299949000  | 1.358225000  |
| 6                       | 2.347487000  | -1.437284000 | -1.676339000 |
| 6                       | -0.876575000 | 0.392123000  | -2.011020000 |
| 6                       | 1.098929000  | -0.890576000 | -2.356198000 |
| 1                       | 3.035324000  | -1.887192000 | -2.396938000 |
| 1                       | 2.061372000  | -2.187132000 | -0.933410000 |
| 1                       | 0.597411000  | -1.740135000 | -2.860686000 |
| 1                       | 1.398408000  | -0.186140000 | -3.158270000 |
| 1                       | -1.628632000 | -0.314455000 | -2.409290000 |
| 1                       | -0.552760000 | 1.015299000  | -2.872019000 |
| 6                       | -1.540492000 | 1.314353000  | -1.028095000 |
| 6                       | -2.887339000 | 1.669143000  | -1.106767000 |
| 1                       | -3.505530000 | 1.242584000  | -1.890273000 |
| 6                       | -1.254389000 | 2.645532000  | 0.840239000  |
| 1                       | -0.568106000 | 3.011664000  | 1.597080000  |

|    |              |              |              |
|----|--------------|--------------|--------------|
| 6  | -3.419352000 | 2.546580000  | -0.171789000 |
| 1  | -4.467138000 | 2.828364000  | -0.212598000 |
| 6  | -2.584379000 | 3.040722000  | 0.829225000  |
| 1  | -2.950839000 | 3.722260000  | 1.589299000  |
| 7  | -0.729597000 | 1.806642000  | -0.069181000 |
| 16 | 3.168615000  | -0.044119000 | -0.817320000 |
| 6  | 4.156364000  | -0.903732000 | 0.507469000  |
| 6  | 5.027064000  | 0.196090000  | 1.122621000  |
| 6  | 5.037479000  | -1.973925000 | -0.142241000 |
| 1  | 4.413189000  | 1.015569000  | 1.510720000  |
| 1  | 5.605426000  | -0.220023000 | 1.955710000  |
| 1  | 5.730895000  | 0.608009000  | 0.391377000  |
| 1  | 4.443560000  | -2.809250000 | -0.526766000 |
| 1  | 5.628316000  | -1.560231000 | -0.966208000 |
| 1  | 5.731390000  | -2.377141000 | 0.605246000  |
| 6  | 3.269116000  | -1.526129000 | 1.585637000  |
| 1  | 3.895671000  | -2.110056000 | 2.271005000  |
| 1  | 2.754634000  | -0.757735000 | 2.167601000  |
| 1  | 2.516306000  | -2.202175000 | 1.167624000  |
| 1  | 0.890010000  | -0.162193000 | 0.881931000  |
| 1  | -1.016208000 | -0.890309000 | 1.601796000  |
| 1  | -0.254389000 | -1.409306000 | -0.480864000 |
| 6  | -1.389547000 | -1.818954000 | 1.137453000  |
| 8  | -0.533607000 | -2.232513000 | 0.115187000  |
| 6  | -2.804026000 | -1.513176000 | 0.652033000  |
| 6  | -3.676704000 | -0.777340000 | 1.462121000  |
| 6  | -3.258588000 | -1.960561000 | -0.589450000 |
| 6  | -4.974375000 | -0.495213000 | 1.042667000  |
| 1  | -3.327853000 | -0.405550000 | 2.423691000  |
| 6  | -4.557381000 | -1.677717000 | -1.016322000 |
| 1  | -2.577129000 | -2.519687000 | -1.223455000 |
| 6  | -5.419822000 | -0.943987000 | -0.202619000 |
| 1  | -5.634240000 | 0.088091000  | 1.679239000  |
| 1  | -4.894289000 | -2.027491000 | -1.988785000 |
| 1  | -6.428959000 | -0.718655000 | -0.536146000 |
| 6  | -1.416580000 | -2.900706000 | 2.218707000  |
| 1  | -0.405538000 | -3.061708000 | 2.607375000  |
| 1  | -2.068464000 | -2.619170000 | 3.052726000  |
| 1  | -1.782127000 | -3.844343000 | 1.797142000  |
| 1  | 1.466916000  | 2.072396000  | -1.549859000 |

TSA3-4<sub>X=H</sub>

Coordinates (Angstroms)

|    | X            | Y            | Z            |
|----|--------------|--------------|--------------|
| 25 | -1.291458000 | 1.136368000  | 0.241614000  |
| 1  | -1.071506000 | 0.568015000  | -1.367771000 |
| 7  | -0.237741000 | -0.306626000 | 1.338068000  |
| 6  | -2.113482000 | 2.442245000  | -0.578582000 |
| 8  | -2.652169000 | 3.365892000  | -1.086846000 |
| 6  | -2.289085000 | -1.577981000 | 1.612678000  |
| 6  | 0.885715000  | 0.343216000  | 1.977108000  |
| 6  | -1.049666000 | -1.022515000 | 2.300327000  |
| 1  | -2.948606000 | -2.083927000 | 2.322178000  |
| 1  | -1.988021000 | -2.285896000 | 0.835220000  |
| 1  | -0.506654000 | -1.875222000 | 2.750494000  |
| 1  | -1.352545000 | -0.363883000 | 3.135043000  |
| 1  | 1.662905000  | -0.363244000 | 2.318086000  |
| 1  | 0.559318000  | 0.910561000  | 2.870376000  |
| 6  | 1.494650000  | 1.325727000  | 1.018045000  |
| 6  | 2.843171000  | 1.677430000  | 1.044186000  |
| 1  | 3.503716000  | 1.205867000  | 1.765178000  |
| 6  | 1.109213000  | 2.753631000  | -0.758212000 |
| 1  | 0.386179000  | 3.152677000  | -1.462239000 |
| 6  | 3.325074000  | 2.606129000  | 0.131151000  |
| 1  | 4.374225000  | 2.885680000  | 0.128996000  |
| 6  | 2.437621000  | 3.153777000  | -0.793520000 |
| 1  | 2.763639000  | 3.876226000  | -1.533871000 |
| 7  | 0.634622000  | 1.861486000  | 0.127538000  |
| 16 | -3.173961000 | -0.180698000 | 0.824294000  |
| 6  | -4.121895000 | -1.023746000 | -0.540302000 |
| 6  | -5.040022000 | 0.060899000  | -1.111091000 |
| 6  | -4.955278000 | -2.158576000 | 0.061526000  |
| 1  | -4.461133000 | 0.914258000  | -1.479873000 |
| 1  | -5.609927000 | -0.351138000 | -1.951932000 |
| 1  | -5.751742000 | 0.422630000  | -0.361308000 |
| 1  | -4.325564000 | -2.978411000 | 0.421565000  |
| 1  | -5.572533000 | -1.804632000 | 0.894022000  |
| 1  | -5.623402000 | -2.566096000 | -0.706694000 |
| 6  | -3.207335000 | -1.558455000 | -1.642548000 |
| 1  | -3.806293000 | -2.144792000 | -2.350048000 |
| 1  | -2.733878000 | -0.742631000 | -2.193779000 |
| 1  | -2.419056000 | -2.210035000 | -1.252732000 |
| 1  | -0.893530000 | -0.077109000 | -0.929069000 |
| 1  | 1.188434000  | -0.467370000 | -1.469556000 |
| 1  | 0.237802000  | -1.244212000 | 0.445333000  |
| 6  | 1.471551000  | -1.505647000 | -1.209683000 |
| 8  | 0.582041000  | -2.039396000 | -0.288077000 |



|   |              |              |              |
|---|--------------|--------------|--------------|
| 6 | 2.905233000  | -1.413422000 | -0.681044000 |
| 6 | 3.884011000  | -0.708485000 | -1.393450000 |
| 6 | 3.260642000  | -2.000205000 | 0.533707000  |
| 6 | 5.181891000  | -0.588935000 | -0.902076000 |
| 1 | 3.620473000  | -0.226832000 | -2.333225000 |
| 6 | 4.560264000  | -1.884652000 | 1.032327000  |
| 1 | 2.495877000  | -2.533361000 | 1.090381000  |
| 6 | 5.526185000  | -1.177528000 | 0.317556000  |
| 1 | 5.923619000  | -0.028127000 | -1.464725000 |
| 1 | 4.815650000  | -2.343872000 | 1.983826000  |
| 1 | 6.535485000  | -1.079648000 | 0.707627000  |
| 6 | 1.422478000  | -2.326929000 | -2.502190000 |
| 1 | 0.406627000  | -2.303998000 | -2.911431000 |
| 1 | 2.110625000  | -1.941021000 | -3.262694000 |
| 1 | 1.686029000  | -3.370453000 | -2.292997000 |
| 1 | -1.539170000 | 1.940110000  | 1.671216000  |

**A4<sub>X=H</sub>**

| Coordinates (Angstroms) |              |              |              |
|-------------------------|--------------|--------------|--------------|
|                         | X            | Y            | Z            |
| 25                      | 1.214482000  | 1.205667000  | -0.187932000 |
| 1                       | 0.913914000  | 0.460106000  | 1.340846000  |
| 7                       | 0.196173000  | -0.144571000 | -1.455385000 |
| 6                       | 2.009084000  | 2.420561000  | 0.788518000  |
| 8                       | 2.538468000  | 3.278130000  | 1.405443000  |
| 6                       | 2.253609000  | -1.397062000 | -1.729527000 |
| 6                       | -0.943972000 | 0.548731000  | -2.040449000 |
| 6                       | 1.050356000  | -0.799542000 | -2.441991000 |
| 1                       | 2.929442000  | -1.879680000 | -2.439045000 |
| 1                       | 1.907578000  | -2.128583000 | -0.993442000 |
| 1                       | 0.515879000  | -1.608467000 | -2.964525000 |
| 1                       | 1.367295000  | -0.065419000 | -3.192407000 |
| 1                       | -1.691416000 | -0.138677000 | -2.460339000 |
| 1                       | -0.586198000 | 1.194756000  | -2.853847000 |
| 6                       | -1.573996000 | 1.415063000  | -0.985996000 |
| 6                       | -2.930954000 | 1.727268000  | -0.986366000 |
| 1                       | -3.573740000 | 1.314409000  | -1.756940000 |
| 6                       | -1.233795000 | 2.664573000  | 0.926176000  |
| 1                       | -0.524617000 | 3.012740000  | 1.669822000  |
| 6                       | -3.442630000 | 2.541766000  | 0.015433000  |
| 1                       | -4.499697000 | 2.787569000  | 0.041467000  |
| 6                       | -2.573899000 | 3.018665000  | 0.994540000  |
| 1                       | -2.922727000 | 3.651796000  | 1.803092000  |

|    |              |              |              |
|----|--------------|--------------|--------------|
| 7  | -0.730426000 | 1.881123000  | -0.042426000 |
| 16 | 3.126347000  | -0.050305000 | -0.846768000 |
| 6  | 4.049254000  | -0.980647000 | 0.479229000  |
| 6  | 5.005548000  | 0.049741000  | 1.087175000  |
| 6  | 4.844243000  | -2.116229000 | -0.171561000 |
| 1  | 4.460289000  | 0.918070000  | 1.471830000  |
| 1  | 5.546802000  | -0.407517000 | 1.923622000  |
| 1  | 5.740920000  | 0.398975000  | 0.354555000  |
| 1  | 4.189558000  | -2.908743000 | -0.547136000 |
| 1  | 5.460707000  | -1.752070000 | -1.000350000 |
| 1  | 5.511157000  | -2.563478000 | 0.575128000  |
| 6  | 3.111891000  | -1.528120000 | 1.556960000  |
| 1  | 3.673465000  | -2.213386000 | 2.203759000  |
| 1  | 2.719987000  | -0.720543000 | 2.180998000  |
| 1  | 2.255877000  | -2.067886000 | 1.137282000  |
| 1  | 0.811551000  | -0.156129000 | 0.843559000  |
| 1  | -1.072218000 | -0.840727000 | 1.804457000  |
| 1  | -0.141764000 | -0.903537000 | -0.789710000 |
| 6  | -1.302076000 | -1.788579000 | 1.252673000  |
| 8  | -0.359520000 | -2.079977000 | 0.315246000  |
| 6  | -2.707397000 | -1.552741000 | 0.667994000  |
| 6  | -3.718312000 | -0.935387000 | 1.416228000  |
| 6  | -3.002338000 | -1.949132000 | -0.637691000 |
| 6  | -4.986558000 | -0.724261000 | 0.877202000  |
| 1  | -3.504227000 | -0.601651000 | 2.430350000  |
| 6  | -4.269503000 | -1.741327000 | -1.186059000 |
| 1  | -2.206245000 | -2.408160000 | -1.217718000 |
| 6  | -5.268503000 | -1.127067000 | -0.430613000 |
| 1  | -5.753522000 | -0.234828000 | 1.472266000  |
| 1  | -4.475009000 | -2.050706000 | -2.208021000 |
| 1  | -6.253437000 | -0.957585000 | -0.857035000 |
| 6  | -1.393960000 | -2.886271000 | 2.336265000  |
| 1  | -0.409583000 | -3.014950000 | 2.801185000  |
| 1  | -2.120804000 | -2.649263000 | 3.124371000  |
| 1  | -1.680469000 | -3.839803000 | 1.874143000  |
| 1  | 1.479296000  | 2.135462000  | -1.535293000 |

**TSA4-5<sub>X=H</sub>**

| Coordinates (Angstroms) |             |              |              |
|-------------------------|-------------|--------------|--------------|
|                         | X           | Y            | Z            |
| 25                      | 1.132562000 | 1.227424000  | -0.143882000 |
| 1                       | 0.779235000 | 0.155431000  | 1.200067000  |
| 7                       | 0.161514000 | -0.062817000 | -1.538305000 |

|    |              |              |              |
|----|--------------|--------------|--------------|
| 6  | 1.857293000  | 2.332782000  | 0.992769000  |
| 8  | 2.334952000  | 3.110236000  | 1.750487000  |
| 6  | 2.240842000  | -1.292573000 | -1.794302000 |
| 6  | -0.964847000 | 0.658971000  | -2.117519000 |
| 6  | 1.045102000  | -0.690999000 | -2.518549000 |
| 1  | 2.933032000  | -1.747857000 | -2.506260000 |
| 1  | 1.895606000  | -2.051249000 | -1.085338000 |
| 1  | 0.529765000  | -1.487464000 | -3.076593000 |
| 1  | 1.370612000  | 0.067897000  | -3.238761000 |
| 1  | -1.687071000 | -0.002182000 | -2.615873000 |
| 1  | -0.576407000 | 1.362427000  | -2.865421000 |
| 6  | -1.642006000 | 1.438914000  | -1.024399000 |
| 6  | -3.004744000 | 1.723042000  | -1.048735000 |
| 1  | -3.612783000 | 1.354492000  | -1.868486000 |
| 6  | -1.388066000 | 2.558287000  | 0.977535000  |
| 1  | -0.710730000 | 2.866918000  | 1.766486000  |
| 6  | -3.565052000 | 2.458793000  | -0.012063000 |
| 1  | -4.627029000 | 2.683856000  | -0.004971000 |
| 6  | -2.736943000 | 2.882439000  | 1.024857000  |
| 1  | -3.124295000 | 3.450894000  | 1.863393000  |
| 7  | -0.835967000 | 1.852650000  | -0.023991000 |
| 16 | 3.075725000  | 0.044586000  | -0.864328000 |
| 6  | 4.085222000  | -0.900447000 | 0.384648000  |
| 6  | 4.964285000  | 0.161531000  | 1.053232000  |
| 6  | 4.957212000  | -1.924169000 | -0.347599000 |
| 1  | 4.355050000  | 0.943743000  | 1.518026000  |
| 1  | 5.567237000  | -0.309007000 | 1.838570000  |
| 1  | 5.646209000  | 0.631919000  | 0.336511000  |
| 1  | 4.358933000  | -2.737629000 | -0.770497000 |
| 1  | 5.531723000  | -1.458616000 | -1.155580000 |
| 1  | 5.665737000  | -2.369110000 | 0.361495000  |
| 6  | 3.215222000  | -1.590958000 | 1.433065000  |
| 1  | 3.856322000  | -2.199783000 | 2.083144000  |
| 1  | 2.689545000  | -0.860238000 | 2.052087000  |
| 1  | 2.458724000  | -2.243548000 | 0.987941000  |
| 1  | 0.474708000  | -0.616475000 | 0.843237000  |
| 1  | -1.154062000 | -0.885455000 | 2.133498000  |
| 1  | -0.189550000 | -0.802292000 | -0.904583000 |
| 6  | -1.247157000 | -1.759114000 | 1.447526000  |
| 8  | -0.170886000 | -1.809996000 | 0.588885000  |
| 6  | -2.585747000 | -1.576886000 | 0.728152000  |
| 6  | -3.684919000 | -1.012809000 | 1.385424000  |
| 6  | -2.746080000 | -1.997031000 | -0.594993000 |
| 6  | -4.913749000 | -0.875067000 | 0.741113000  |

|   |              |              |              |
|---|--------------|--------------|--------------|
| 1 | -3.572146000 | -0.665695000 | 2.410967000  |
| 6 | -3.972324000 | -1.861002000 | -1.246632000 |
| 1 | -1.889602000 | -2.422185000 | -1.111393000 |
| 6 | -5.062531000 | -1.300300000 | -0.580356000 |
| 1 | -5.753129000 | -0.424708000 | 1.264412000  |
| 1 | -4.076469000 | -2.188428000 | -2.278060000 |
| 1 | -6.016662000 | -1.187127000 | -1.087544000 |
| 6 | -1.306950000 | -3.012274000 | 2.337303000  |
| 1 | -0.362474000 | -3.114053000 | 2.883030000  |
| 1 | -2.126339000 | -2.966891000 | 3.065480000  |
| 1 | -1.443139000 | -3.907046000 | 1.717264000  |
| 1 | 1.428070000  | 2.272924000  | -1.431722000 |

**A5S<sub>X=H</sub>**

| Coordinates (Angstroms) |              |              |              |
|-------------------------|--------------|--------------|--------------|
|                         | X            | Y            | Z            |
| 25                      | 1.115905000  | -1.256332000 | 0.066371000  |
| 1                       | 0.732450000  | -0.124533000 | -1.179379000 |
| 7                       | 0.086859000  | 0.037075000  | 1.465614000  |
| 1                       | -0.301531000 | 0.794607000  | 0.903686000  |
| 6                       | 1.870889000  | -2.365187000 | -1.036066000 |
| 8                       | 2.364447000  | -3.146521000 | -1.786082000 |
| 6                       | 2.184374000  | 1.245139000  | 1.804583000  |
| 6                       | -1.019873000 | -0.735689000 | 2.026027000  |
| 6                       | 0.960742000  | 0.638859000  | 2.476232000  |
| 1                       | 2.851871000  | 1.674363000  | 2.555860000  |
| 1                       | 1.876399000  | 2.035080000  | 1.112870000  |
| 1                       | 0.440085000  | 1.422162000  | 3.046822000  |
| 1                       | 1.261571000  | -0.146124000 | 3.177336000  |
| 1                       | -1.771210000 | -0.106223000 | 2.521229000  |
| 1                       | -0.602608000 | -1.422825000 | 2.772507000  |
| 6                       | -1.655097000 | -1.549261000 | 0.932333000  |
| 6                       | -3.004207000 | -1.890494000 | 0.954809000  |
| 1                       | -3.631983000 | -1.531040000 | 1.763569000  |
| 6                       | -1.339388000 | -2.705814000 | -1.037844000 |
| 1                       | -0.644743000 | -3.003702000 | -1.815607000 |
| 6                       | -3.527216000 | -2.675556000 | -0.065818000 |
| 1                       | -4.578223000 | -2.947373000 | -0.072367000 |
| 6                       | -2.672623000 | -3.090579000 | -1.084172000 |
| 1                       | -3.027033000 | -3.699940000 | -1.908687000 |
| 7                       | -0.822693000 | -1.951649000 | -0.052177000 |
| 16                      | 3.044230000  | -0.071821000 | 0.869789000  |
| 6                       | 4.120406000  | 0.898569000  | -0.301120000 |

|   |              |              |              |
|---|--------------|--------------|--------------|
| 6 | 4.943818000  | -0.168452000 | -1.029921000 |
| 6 | 5.039469000  | 1.819787000  | 0.505176000  |
| 1 | 4.295755000  | -0.851123000 | -1.588716000 |
| 1 | 5.620984000  | 0.317609000  | -1.741918000 |
| 1 | 5.550569000  | -0.758277000 | -0.333935000 |
| 1 | 4.480340000  | 2.620832000  | 1.000031000  |
| 1 | 5.596811000  | 1.265149000  | 1.267687000  |
| 1 | 5.763969000  | 2.291731000  | -0.169716000 |
| 6 | 3.310316000  | 1.703822000  | -1.313919000 |
| 1 | 3.999381000  | 2.248932000  | -1.971087000 |
| 1 | 2.685258000  | 1.049262000  | -1.926297000 |
| 1 | 2.658080000  | 2.439530000  | -0.834052000 |
| 1 | -1.268986000 | 1.355836000  | -2.345066000 |
| 1 | 0.271914000  | 1.223719000  | -0.908795000 |
| 6 | -1.362908000 | 2.100460000  | -1.540997000 |
| 8 | -0.177027000 | 2.108083000  | -0.770645000 |
| 6 | -2.584239000 | 1.730275000  | -0.710704000 |
| 6 | -3.672833000 | 1.091284000  | -1.312130000 |
| 6 | -2.670304000 | 2.074979000  | 0.641070000  |
| 6 | -4.828627000 | 0.812782000  | -0.584511000 |
| 1 | -3.611641000 | 0.806881000  | -2.360449000 |
| 6 | -3.821944000 | 1.790859000  | 1.375187000  |
| 1 | -1.826749000 | 2.564715000  | 1.120330000  |
| 6 | -4.907752000 | 1.164099000  | 0.763617000  |
| 1 | -5.663600000 | 0.311871000  | -1.066591000 |
| 1 | -3.871306000 | 2.058987000  | 2.427158000  |
| 1 | -5.804593000 | 0.941355000  | 1.334710000  |
| 6 | -1.543182000 | 3.480111000  | -2.170429000 |
| 1 | -0.691398000 | 3.712107000  | -2.817569000 |
| 1 | -2.459445000 | 3.522078000  | -2.768559000 |
| 1 | -1.606080000 | 4.245703000  | -1.388648000 |
| 1 | 1.402921000  | -2.264349000 | 1.429079000  |

**TSA2-6<sub>X=H</sub>**

| -----                   |              |              |              |
|-------------------------|--------------|--------------|--------------|
| Coordinates (Angstroms) |              |              |              |
|                         | X            | Y            | Z            |
| -----                   |              |              |              |
| 25                      | -0.204455000 | 0.346141000  | -0.316664000 |
| 1                       | -0.034548000 | 0.225764000  | 1.403045000  |
| 7                       | -0.582161000 | -1.681906000 | 0.180917000  |
| 1                       | -0.270585000 | -0.664068000 | 1.075301000  |
| 6                       | 0.091823000  | 2.063151000  | -0.385311000 |
| 8                       | 0.289958000  | 3.233573000  | -0.373321000 |
| 6                       | 1.809209000  | -2.102804000 | 0.093228000  |

|    |              |              |              |
|----|--------------|--------------|--------------|
| 6  | -1.921197000 | -2.011938000 | -0.217324000 |
| 6  | 0.418067000  | -2.618454000 | -0.255587000 |
| 1  | 2.582995000  | -2.783151000 | -0.270783000 |
| 1  | 1.907031000  | -2.000919000 | 1.178756000  |
| 1  | 0.301259000  | -3.610775000 | 0.218637000  |
| 1  | 0.355306000  | -2.786905000 | -1.350121000 |
| 1  | -2.330893000 | -2.901691000 | 0.293555000  |
| 1  | -1.964908000 | -2.234949000 | -1.306117000 |
| 6  | -2.833901000 | -0.838914000 | 0.025756000  |
| 6  | -4.202243000 | -0.987260000 | 0.248435000  |
| 1  | -4.631655000 | -1.983334000 | 0.290363000  |
| 6  | -3.019247000 | 1.461765000  | 0.144830000  |
| 1  | -2.508638000 | 2.417643000  | 0.102670000  |
| 6  | -4.996102000 | 0.141850000  | 0.410784000  |
| 1  | -6.064066000 | 0.046557000  | 0.581129000  |
| 6  | -4.389124000 | 1.394649000  | 0.356758000  |
| 1  | -4.958846000 | 2.309166000  | 0.481111000  |
| 7  | -2.246510000 | 0.375151000  | -0.023427000 |
| 16 | 2.009359000  | -0.451586000 | -0.675525000 |
| 6  | 3.387217000  | 0.306344000  | 0.321380000  |
| 6  | 3.757104000  | 1.583145000  | -0.439766000 |
| 6  | 4.581549000  | -0.650861000 | 0.351028000  |
| 1  | 2.897275000  | 2.253746000  | -0.533327000 |
| 1  | 4.545601000  | 2.116259000  | 0.104490000  |
| 1  | 4.131095000  | 1.357053000  | -1.444016000 |
| 1  | 4.366176000  | -1.554388000 | 0.930278000  |
| 1  | 4.880329000  | -0.949586000 | -0.659498000 |
| 1  | 5.435235000  | -0.150465000 | 0.823757000  |
| 6  | 2.942387000  | 0.656343000  | 1.740402000  |
| 1  | 3.794829000  | 1.073870000  | 2.290429000  |
| 1  | 2.140524000  | 1.399189000  | 1.729425000  |
| 1  | 2.588609000  | -0.221761000 | 2.290181000  |
| 1  | -0.472726000 | 0.111217000  | -1.987794000 |

**A6<sub>X=H</sub>**

| -----                   |              |              |              |
|-------------------------|--------------|--------------|--------------|
| Coordinates (Angstroms) |              |              |              |
|                         | X            | Y            | Z            |
| -----                   |              |              |              |
| 25                      | -0.216525000 | 0.407806000  | -0.231703000 |
| 1                       | -0.018049000 | 0.553731000  | 1.474774000  |
| 7                       | -0.544212000 | -1.700294000 | 0.127733000  |
| 1                       | -0.493187000 | -1.809648000 | 1.137727000  |
| 6                       | -0.028186000 | 2.100352000  | -0.568542000 |
| 8                       | 0.076570000  | 3.258977000  | -0.822919000 |

|    |              |              |              |
|----|--------------|--------------|--------------|
| 6  | 1.863061000  | -2.068109000 | -0.121417000 |
| 6  | -1.906279000 | -2.005563000 | -0.310165000 |
| 6  | 0.471523000  | -2.564321000 | -0.482357000 |
| 1  | 2.620133000  | -2.684876000 | -0.612046000 |
| 1  | 2.010452000  | -2.132074000 | 0.960563000  |
| 1  | 0.366050000  | -3.609112000 | -0.156311000 |
| 1  | 0.326872000  | -2.530646000 | -1.566545000 |
| 1  | -2.290366000 | -2.944382000 | 0.110422000  |
| 1  | -1.881570000 | -2.111391000 | -1.401958000 |
| 6  | -2.823495000 | -0.861084000 | 0.027368000  |
| 6  | -4.186944000 | -1.051646000 | 0.238393000  |
| 1  | -4.597261000 | -2.056302000 | 0.207781000  |
| 6  | -3.043951000 | 1.417788000  | 0.305751000  |
| 1  | -2.547761000 | 2.381658000  | 0.338136000  |
| 6  | -5.001599000 | 0.049468000  | 0.477840000  |
| 1  | -6.067787000 | -0.075048000 | 0.638853000  |
| 6  | -4.412600000 | 1.311324000  | 0.511515000  |
| 1  | -4.997132000 | 2.205630000  | 0.699196000  |
| 7  | -2.249401000 | 0.360622000  | 0.059936000  |
| 16 | 2.022801000  | -0.321927000 | -0.648943000 |
| 6  | 3.431976000  | 0.285156000  | 0.414321000  |
| 6  | 3.589971000  | 1.759094000  | 0.028318000  |
| 6  | 4.696519000  | -0.498182000 | 0.053017000  |
| 1  | 2.692330000  | 2.330923000  | 0.283573000  |
| 1  | 4.438601000  | 2.189361000  | 0.572772000  |
| 1  | 3.781453000  | 1.878284000  | -1.043948000 |
| 1  | 4.605448000  | -1.557248000 | 0.316749000  |
| 1  | 4.918259000  | -0.426762000 | -1.016900000 |
| 1  | 5.551362000  | -0.090964000 | 0.606712000  |
| 6  | 3.147267000  | 0.175098000  | 1.910598000  |
| 1  | 3.978392000  | 0.628200000  | 2.464889000  |
| 1  | 2.224947000  | 0.697689000  | 2.174328000  |
| 1  | 3.060822000  | -0.863877000 | 2.244536000  |
| 1  | -0.474530000 | -0.007826000 | -1.895814000 |

**A7R<sub>X=H</sub>**

Coordinates (Angstroms)

|    | X            | Y            | Z            |
|----|--------------|--------------|--------------|
| 25 | -0.843287000 | -1.159144000 | 0.365736000  |
| 1  | -0.434320000 | 0.446471000  | 0.706621000  |
| 7  | -0.442916000 | -0.708235000 | -1.720678000 |
| 1  | -0.058036000 | 0.235287000  | -1.728180000 |
| 6  | -1.058517000 | -1.564980000 | 2.037597000  |

|    |              |              |              |
|----|--------------|--------------|--------------|
| 8  | -1.170129000 | -1.853476000 | 3.188738000  |
| 6  | -2.745504000 | 0.091172000  | -1.913642000 |
| 6  | 0.603558000  | -1.627055000 | -2.163621000 |
| 6  | -1.636230000 | -0.717962000 | -2.570520000 |
| 1  | -3.643783000 | 0.074699000  | -2.536351000 |
| 1  | -2.421720000 | 1.128584000  | -1.790719000 |
| 1  | -1.429811000 | -0.298595000 | -3.566235000 |
| 1  | -1.950149000 | -1.758751000 | -2.700839000 |
| 1  | 1.094567000  | -1.299767000 | -3.090498000 |
| 1  | 0.131628000  | -2.598885000 | -2.355043000 |
| 6  | 1.617588000  | -1.801193000 | -1.064630000 |
| 6  | 2.935158000  | -2.166703000 | -1.330191000 |
| 1  | 3.257681000  | -2.286847000 | -2.359983000 |
| 6  | 2.018673000  | -1.803474000 | 1.206454000  |
| 1  | 1.616541000  | -1.634638000 | 2.199467000  |
| 6  | 3.812399000  | -2.375648000 | -0.272897000 |
| 1  | 4.842916000  | -2.664065000 | -0.455245000 |
| 6  | 3.341048000  | -2.181482000 | 1.023512000  |
| 1  | 3.985781000  | -2.311316000 | 1.886160000  |
| 7  | 1.152885000  | -1.629901000 | 0.191418000  |
| 16 | -3.092680000 | -0.624390000 | -0.267178000 |
| 6  | -4.021785000 | 0.749222000  | 0.584498000  |
| 6  | -4.284228000 | 0.209920000  | 1.993968000  |
| 6  | -5.343546000 | 0.987448000  | -0.150344000 |
| 1  | -3.344640000 | 0.056133000  | 2.533061000  |
| 1  | -4.889219000 | 0.931993000  | 2.554656000  |
| 1  | -4.828719000 | -0.740603000 | 1.969467000  |
| 1  | -5.179200000 | 1.373930000  | -1.161876000 |
| 1  | -5.932621000 | 0.067227000  | -0.223860000 |
| 1  | -5.938064000 | 1.730999000  | 0.394774000  |
| 6  | -3.219400000 | 2.044855000  | 0.673701000  |
| 1  | -3.779057000 | 2.770035000  | 1.277604000  |
| 1  | -2.249029000 | 1.871600000  | 1.144691000  |
| 1  | -3.051571000 | 2.498714000  | -0.308074000 |
| 6  | 1.093553000  | 2.506459000  | -0.935323000 |
| 8  | 0.911950000  | 2.020492000  | -2.047904000 |
| 6  | 2.305127000  | 2.134554000  | -0.139461000 |
| 6  | 2.457378000  | 2.526017000  | 1.196421000  |
| 6  | 3.318096000  | 1.388649000  | -0.754175000 |
| 6  | 3.604920000  | 2.177061000  | 1.903742000  |
| 1  | 1.678470000  | 3.091303000  | 1.696996000  |
| 6  | 4.469776000  | 1.051737000  | -0.051159000 |
| 1  | 3.194710000  | 1.081262000  | -1.787653000 |
| 6  | 4.614576000  | 1.444817000  | 1.279704000  |



|   |              |              |              |
|---|--------------|--------------|--------------|
| 1 | 3.710353000  | 2.474308000  | 2.942663000  |
| 1 | 5.251857000  | 0.476854000  | -0.537527000 |
| 1 | 5.511362000  | 1.176473000  | 1.830866000  |
| 6 | 0.132101000  | 3.517839000  | -0.373488000 |
| 1 | -0.673306000 | 3.686652000  | -1.089329000 |
| 1 | -0.290825000 | 3.159683000  | 0.569432000  |
| 1 | 0.650138000  | 4.462020000  | -0.172242000 |
| 1 | -1.259675000 | -2.748624000 | -0.214081000 |

---

**A7S<sub>X=H</sub>**

---

Coordinates (Angstroms)

---

|    | X            | Y            | Z            |
|----|--------------|--------------|--------------|
| 25 | 0.699546000  | -1.498917000 | 0.158315000  |
| 1  | 0.073299000  | -0.101227000 | 0.857408000  |
| 7  | 0.755881000  | -0.358830000 | -1.673322000 |
| 1  | 0.471626000  | 0.583651000  | -1.416914000 |
| 6  | 0.755200000  | -2.403917000 | 1.638591000  |
| 8  | 0.825789000  | -3.014869000 | 2.660117000  |
| 6  | -1.551830000 | -1.027311000 | -2.104826000 |
| 6  | 2.152959000  | -0.301832000 | -2.101260000 |
| 6  | -0.164320000 | -0.846789000 | -2.702412000 |
| 1  | -2.242547000 | -1.407134000 | -2.861971000 |
| 1  | -1.924651000 | -0.063977000 | -1.742067000 |
| 1  | -0.229260000 | -0.150425000 | -3.551648000 |
| 1  | 0.220324000  | -1.801913000 | -3.074772000 |
| 1  | 2.339511000  | 0.482889000  | -2.845850000 |
| 1  | 2.398738000  | -1.270150000 | -2.555465000 |
| 6  | 3.031760000  | -0.107204000 | -0.895881000 |
| 6  | 4.256933000  | 0.551473000  | -0.969162000 |
| 1  | 4.578088000  | 0.978580000  | -1.914094000 |
| 6  | 3.334926000  | -0.531874000 | 1.351281000  |
| 1  | 2.923515000  | -0.964349000 | 2.257035000  |
| 6  | 5.046852000  | 0.653923000  | 0.170202000  |
| 1  | 6.006346000  | 1.160416000  | 0.136032000  |
| 6  | 4.570794000  | 0.098697000  | 1.356436000  |
| 1  | 5.140189000  | 0.154711000  | 2.278128000  |
| 7  | 2.567163000  | -0.644645000 | 0.252097000  |
| 16 | -1.446532000 | -2.188769000 | -0.693692000 |
| 6  | -2.999812000 | -1.796211000 | 0.259336000  |
| 6  | -2.985061000 | -2.782548000 | 1.431034000  |
| 6  | -4.213563000 | -2.053796000 | -0.638054000 |
| 1  | -2.097152000 | -2.634734000 | 2.053547000  |
| 1  | -3.873134000 | -2.620983000 | 2.052945000  |

|   |              |              |              |
|---|--------------|--------------|--------------|
| 1 | -2.996614000 | -3.822130000 | 1.085014000  |
| 1 | -4.267330000 | -1.333291000 | -1.461216000 |
| 1 | -4.191744000 | -3.062973000 | -1.062909000 |
| 1 | -5.133763000 | -1.950903000 | -0.049933000 |
| 6 | -3.025119000 | -0.365347000 | 0.792879000  |
| 1 | -3.965489000 | -0.203823000 | 1.334755000  |
| 1 | -2.191156000 | -0.184530000 | 1.474138000  |
| 1 | -2.975297000 | 0.378343000  | -0.007641000 |
| 6 | 0.688519000  | 2.743871000  | 0.035936000  |
| 8 | 1.132785000  | 2.649003000  | -1.103306000 |
| 6 | -0.782839000 | 2.932207000  | 0.247224000  |
| 6 | -1.344279000 | 3.011323000  | 1.526687000  |
| 6 | -1.616640000 | 3.027888000  | -0.874180000 |
| 6 | -2.716966000 | 3.190832000  | 1.680930000  |
| 1 | -0.717340000 | 2.925579000  | 2.408158000  |
| 6 | -2.987070000 | 3.208106000  | -0.720274000 |
| 1 | -1.177166000 | 2.957473000  | -1.864131000 |
| 6 | -3.539386000 | 3.291599000  | 0.559161000  |
| 1 | -3.145606000 | 3.247640000  | 2.676760000  |
| 1 | -3.626046000 | 3.279818000  | -1.595417000 |
| 1 | -4.609515000 | 3.430354000  | 0.681814000  |
| 6 | 1.608073000  | 2.699505000  | 1.225486000  |
| 1 | 2.629700000  | 2.526884000  | 0.882753000  |
| 1 | 1.560138000  | 3.645782000  | 1.776088000  |
| 1 | 1.310640000  | 1.895281000  | 1.904455000  |
| 1 | 1.322876000  | -2.785947000 | -0.834513000 |

**TSA7-8R<sub>X=H</sub>**

| -----                   |              |              |              |
|-------------------------|--------------|--------------|--------------|
| Coordinates (Angstroms) |              |              |              |
|                         | X            | Y            | Z            |
| -----                   |              |              |              |
| 25                      | -0.657335000 | 0.620484000  | -0.806564000 |
| 1                       | -0.314448000 | -0.704722000 | 0.256475000  |
| 7                       | -0.484947000 | 1.733547000  | 0.995128000  |
| 1                       | -0.143768000 | 1.021897000  | 1.650371000  |
| 6                       | -0.680962000 | -0.460090000 | -2.161560000 |
| 8                       | -0.661789000 | -1.250302000 | -3.054179000 |
| 6                       | -2.835333000 | 1.227940000  | 1.448184000  |
| 6                       | 0.581284000  | 2.718168000  | 0.833169000  |
| 6                       | -1.736148000 | 2.281515000  | 1.526022000  |
| 1                       | -3.776103000 | 1.638641000  | 1.824053000  |
| 1                       | -2.564342000 | 0.353522000  | 2.048658000  |
| 1                       | -1.622849000 | 2.608142000  | 2.570073000  |
| 1                       | -2.011799000 | 3.157652000  | 0.928753000  |

|    |              |              |              |
|----|--------------|--------------|--------------|
| 1  | 0.974271000  | 3.085085000  | 1.791838000  |
| 1  | 0.170079000  | 3.577831000  | 0.288509000  |
| 6  | 1.689726000  | 2.123180000  | 0.004640000  |
| 6  | 2.997093000  | 2.598796000  | 0.076562000  |
| 1  | 3.244523000  | 3.373011000  | 0.796257000  |
| 6  | 2.264908000  | 0.646071000  | -1.671178000 |
| 1  | 1.938201000  | -0.140561000 | -2.341622000 |
| 6  | 3.960345000  | 2.082760000  | -0.782831000 |
| 1  | 4.983621000  | 2.443831000  | -0.748748000 |
| 6  | 3.580600000  | 1.086836000  | -1.678734000 |
| 1  | 4.291164000  | 0.643239000  | -2.367847000 |
| 7  | 1.322409000  | 1.148806000  | -0.854525000 |
| 16 | -2.998311000 | 0.734835000  | -0.304772000 |
| 6  | -4.035219000 | -0.806812000 | -0.238480000 |
| 6  | -4.338469000 | -1.117694000 | -1.707975000 |
| 6  | -5.331909000 | -0.526037000 | 0.522733000  |
| 1  | -3.415916000 | -1.265017000 | -2.278480000 |
| 1  | -4.929233000 | -2.039088000 | -1.771115000 |
| 1  | -4.911390000 | -0.312134000 | -2.179789000 |
| 1  | -5.145949000 | -0.342858000 | 1.585985000  |
| 1  | -5.859665000 | 0.339877000  | 0.109106000  |
| 1  | -5.995834000 | -1.395972000 | 0.448736000  |
| 6  | -3.272147000 | -1.966242000 | 0.391500000  |
| 1  | -3.876081000 | -2.880746000 | 0.334681000  |
| 1  | -2.326252000 | -2.129625000 | -0.131934000 |
| 1  | -3.053210000 | -1.777598000 | 1.446261000  |
| 6  | 0.739887000  | -1.262841000 | 1.827911000  |
| 8  | 0.714971000  | -0.295980000 | 2.611621000  |
| 6  | 2.002325000  | -1.539035000 | 1.047170000  |
| 6  | 2.048514000  | -2.433424000 | -0.028389000 |
| 6  | 3.185791000  | -0.929122000 | 1.470279000  |
| 6  | 3.256728000  | -2.721988000 | -0.656017000 |
| 1  | 1.131277000  | -2.879316000 | -0.401178000 |
| 6  | 4.398106000  | -1.217905000 | 0.844174000  |
| 1  | 3.147329000  | -0.229800000 | 2.299556000  |
| 6  | 4.438461000  | -2.120701000 | -0.216347000 |
| 1  | 3.275967000  | -3.412415000 | -1.494557000 |
| 1  | 5.309849000  | -0.735843000 | 1.185696000  |
| 1  | 5.380855000  | -2.345117000 | -0.707885000 |
| 6  | -0.182184000 | -2.435575000 | 2.080324000  |
| 1  | -1.117996000 | -2.074287000 | 2.508750000  |
| 1  | -0.391039000 | -3.028967000 | 1.189767000  |
| 1  | 0.311699000  | -3.083985000 | 2.817852000  |
| 1  | -0.972685000 | 2.092865000  | -1.648466000 |

-----  
**TSA7-8S<sub>X=H</sub>**  
-----

Coordinates (Angstroms)

|    | X            | Y            | Z            |
|----|--------------|--------------|--------------|
| 25 | 0.819543000  | -1.158905000 | 0.326503000  |
| 1  | 0.048937000  | 0.396506000  | 0.480150000  |
| 7  | 1.004953000  | -0.514441000 | -1.690524000 |
| 1  | 0.755823000  | 0.477097000  | -1.607999000 |
| 6  | 0.642701000  | -1.442364000 | 2.029594000  |
| 8  | 0.506765000  | -1.561087000 | 3.207707000  |
| 6  | -1.292375000 | -1.263208000 | -2.057247000 |
| 6  | 2.416128000  | -0.559712000 | -2.061223000 |
| 6  | 0.104066000  | -1.149000000 | -2.655088000 |
| 1  | -1.963226000 | -1.764688000 | -2.759417000 |
| 1  | -1.690554000 | -0.269207000 | -1.829782000 |
| 1  | 0.051682000  | -0.581657000 | -3.595767000 |
| 1  | 0.494910000  | -2.145728000 | -2.887352000 |
| 1  | 2.645158000  | 0.045281000  | -2.949681000 |
| 1  | 2.676730000  | -1.602280000 | -2.285092000 |
| 6  | 3.240306000  | -0.102423000 | -0.888248000 |
| 6  | 4.502969000  | 0.463149000  | -1.049844000 |
| 1  | 4.891210000  | 0.625561000  | -2.050587000 |
| 6  | 3.421610000  | 0.022000000  | 1.407761000  |
| 1  | 2.950547000  | -0.157766000 | 2.367765000  |
| 6  | 5.247349000  | 0.806098000  | 0.073093000  |
| 1  | 6.234000000  | 1.246992000  | -0.029882000 |
| 6  | 4.692168000  | 0.574691000  | 1.329770000  |
| 1  | 5.226356000  | 0.822198000  | 2.240916000  |
| 7  | 2.693926000  | -0.314906000 | 0.327633000  |
| 16 | -1.141516000 | -2.223923000 | -0.510921000 |
| 6  | -2.778845000 | -1.958126000 | 0.330007000  |
| 6  | -2.762716000 | -2.935612000 | 1.510389000  |
| 6  | -3.919989000 | -2.304178000 | -0.628953000 |
| 1  | -1.922196000 | -2.730973000 | 2.181448000  |
| 1  | -3.691056000 | -2.825147000 | 2.082834000  |
| 1  | -2.692397000 | -3.975354000 | 1.172920000  |
| 1  | -3.994189000 | -1.580240000 | -1.447149000 |
| 1  | -3.798011000 | -3.303857000 | -1.059826000 |
| 1  | -4.871120000 | -2.283229000 | -0.083106000 |
| 6  | -2.921916000 | -0.529258000 | 0.841346000  |
| 1  | -3.875538000 | -0.426162000 | 1.374436000  |
| 1  | -2.106459000 | -0.272369000 | 1.521859000  |
| 1  | -2.916385000 | 0.194406000  | 0.022869000  |

|   |              |              |              |
|---|--------------|--------------|--------------|
| 6 | 0.285259000  | 2.249102000  | 0.008930000  |
| 8 | 0.858062000  | 2.257518000  | -1.098579000 |
| 6 | -1.208130000 | 2.477461000  | 0.041031000  |
| 6 | -1.904763000 | 2.739281000  | 1.225752000  |
| 6 | -1.910496000 | 2.486883000  | -1.169036000 |
| 6 | -3.274235000 | 2.998583000  | 1.200301000  |
| 1 | -1.386902000 | 2.730960000  | 2.179398000  |
| 6 | -3.279939000 | 2.738163000  | -1.196471000 |
| 1 | -1.366917000 | 2.295507000  | -2.088995000 |
| 6 | -3.967767000 | 2.997014000  | -0.009761000 |
| 1 | -3.800272000 | 3.196634000  | 2.129928000  |
| 1 | -3.810771000 | 2.736159000  | -2.144482000 |
| 1 | -5.035605000 | 3.195386000  | -0.028275000 |
| 6 | 1.080630000  | 2.581386000  | 1.253897000  |
| 1 | 2.120481000  | 2.295817000  | 1.092542000  |
| 1 | 1.038963000  | 3.668654000  | 1.407933000  |
| 1 | 0.706799000  | 2.086373000  | 2.151190000  |
| 1 | 1.572815000  | -2.645098000 | -0.095410000 |

**A8R<sub>X=H</sub>**

| -----                   |              |              |              |
|-------------------------|--------------|--------------|--------------|
| Coordinates (Angstroms) |              |              |              |
|                         | X            | Y            | Z            |
| -----                   |              |              |              |
| 25                      | -0.677756000 | -0.899262000 | 0.845805000  |
| 1                       | -0.272129000 | 1.277876000  | -0.621394000 |
| 7                       | -0.505816000 | -1.704350000 | -0.945608000 |
| 1                       | 0.046768000  | -0.360993000 | -1.859407000 |
| 6                       | -0.637329000 | 0.382189000  | 2.029556000  |
| 8                       | -0.586475000 | 1.308608000  | 2.776430000  |
| 6                       | -2.782062000 | -1.128237000 | -1.538340000 |
| 6                       | 0.637347000  | -2.568851000 | -1.122836000 |
| 6                       | -1.658310000 | -2.143096000 | -1.707746000 |
| 1                       | -3.719204000 | -1.488685000 | -1.970219000 |
| 1                       | -2.502235000 | -0.184652000 | -2.016077000 |
| 1                       | -1.435122000 | -2.224893000 | -2.787750000 |
| 1                       | -2.009328000 | -3.142313000 | -1.386885000 |
| 1                       | 1.029785000  | -2.568618000 | -2.157252000 |
| 1                       | 0.395314000  | -3.624791000 | -0.895429000 |
| 6                       | 1.727819000  | -2.127239000 | -0.187547000 |
| 6                       | 3.058560000  | -2.517994000 | -0.340934000 |
| 1                       | 3.333866000  | -3.158216000 | -1.173568000 |
| 6                       | 2.258565000  | -0.895971000 | 1.694967000  |
| 1                       | 1.898783000  | -0.246624000 | 2.485360000  |
| 6                       | 4.007737000  | -2.078438000 | 0.570830000  |

|    |              |              |              |
|----|--------------|--------------|--------------|
| 1  | 5.049711000  | -2.365659000 | 0.467319000  |
| 6  | 3.596527000  | -1.246951000 | 1.612257000  |
| 1  | 4.300010000  | -0.866034000 | 2.344563000  |
| 7  | 1.329545000  | -1.325350000 | 0.820544000  |
| 16 | -2.973014000 | -0.847840000 | 0.258665000  |
| 6  | -3.890284000 | 0.768547000  | 0.346957000  |
| 6  | -4.224127000 | 0.948814000  | 1.830869000  |
| 6  | -5.176309000 | 0.675287000  | -0.477938000 |
| 1  | -3.317440000 | 0.957595000  | 2.443600000  |
| 1  | -4.739831000 | 1.905751000  | 1.972441000  |
| 1  | -4.881625000 | 0.151661000  | 2.194043000  |
| 1  | -4.966729000 | 0.584852000  | -1.548707000 |
| 1  | -5.790439000 | -0.178532000 | -0.172244000 |
| 1  | -5.764725000 | 1.588875000  | -0.331272000 |
| 6  | -3.027812000 | 1.931682000  | -0.141330000 |
| 1  | -3.599091000 | 2.864988000  | -0.063620000 |
| 1  | -2.121567000 | 2.030789000  | 0.461391000  |
| 1  | -2.737651000 | 1.808745000  | -1.188884000 |
| 6  | 0.415286000  | 1.497541000  | -1.457042000 |
| 8  | 0.363512000  | 0.441131000  | -2.381484000 |
| 6  | 1.799676000  | 1.679244000  | -0.847764000 |
| 6  | 1.950642000  | 2.428859000  | 0.324403000  |
| 6  | 2.935484000  | 1.128581000  | -1.442290000 |
| 6  | 3.210757000  | 2.639346000  | 0.880338000  |
| 1  | 1.069048000  | 2.836284000  | 0.814125000  |
| 6  | 4.200419000  | 1.337427000  | -0.889342000 |
| 1  | 2.817508000  | 0.525768000  | -2.337462000 |
| 6  | 4.343948000  | 2.097210000  | 0.270753000  |
| 1  | 3.308091000  | 3.215112000  | 1.796783000  |
| 1  | 5.074541000  | 0.896876000  | -1.361615000 |
| 1  | 5.326774000  | 2.252805000  | 0.706771000  |
| 6  | -0.047060000 | 2.784749000  | -2.137628000 |
| 1  | -1.044182000 | 2.644290000  | -2.566760000 |
| 1  | -0.088476000 | 3.615266000  | -1.425172000 |
| 1  | 0.641950000  | 3.056817000  | -2.945751000 |
| 1  | -0.969465000 | -2.103554000 | 1.934029000  |

-----  
**A8S<sub>X=H</sub>**

-----  
Coordinates (Angstroms)

|    | X           | Y            | Z            |
|----|-------------|--------------|--------------|
| 25 | 1.026688000 | -1.306973000 | 0.508831000  |
| 1  | 0.042201000 | 1.127239000  | 0.345045000  |
| 7  | 1.259371000 | -1.013617000 | -1.420212000 |

|    |              |              |              |
|----|--------------|--------------|--------------|
| 1  | 0.516171000  | 0.523346000  | -1.574884000 |
| 6  | 0.478341000  | -0.891164000 | 2.112156000  |
| 8  | 0.088844000  | -0.502686000 | 3.168404000  |
| 6  | -0.853640000 | -2.055545000 | -1.977116000 |
| 6  | 2.590814000  | -0.631398000 | -1.831912000 |
| 6  | 0.581980000  | -1.811916000 | -2.422378000 |
| 1  | -1.357337000 | -2.784083000 | -2.617184000 |
| 1  | -1.409565000 | -1.113400000 | -1.997237000 |
| 1  | 0.550555000  | -1.302237000 | -3.402957000 |
| 1  | 1.090632000  | -2.779615000 | -2.590943000 |
| 1  | 2.600163000  | 0.015154000  | -2.728766000 |
| 1  | 3.209529000  | -1.512439000 | -2.088822000 |
| 6  | 3.255993000  | 0.093910000  | -0.697617000 |
| 6  | 4.366885000  | 0.920118000  | -0.872153000 |
| 1  | 4.777604000  | 1.058212000  | -1.867653000 |
| 6  | 3.244880000  | 0.513197000  | 1.575666000  |
| 1  | 2.765373000  | 0.325077000  | 2.530136000  |
| 6  | 4.926080000  | 1.553780000  | 0.228978000  |
| 1  | 5.788818000  | 2.202939000  | 0.115135000  |
| 6  | 4.349761000  | 1.344834000  | 1.482233000  |
| 1  | 4.746183000  | 1.817461000  | 2.374290000  |
| 7  | 2.696868000  | -0.105001000 | 0.513070000  |
| 16 | -0.786865000 | -2.663200000 | -0.253067000 |
| 6  | -2.489864000 | -2.277095000 | 0.391076000  |
| 6  | -2.553492000 | -2.950916000 | 1.764201000  |
| 6  | -3.540611000 | -2.881451000 | -0.542874000 |
| 1  | -1.778243000 | -2.565425000 | 2.433606000  |
| 1  | -3.528835000 | -2.750990000 | 2.222924000  |
| 1  | -2.432915000 | -4.036434000 | 1.682619000  |
| 1  | -3.548682000 | -2.387527000 | -1.519498000 |
| 1  | -3.373655000 | -3.952863000 | -0.696284000 |
| 1  | -4.534682000 | -2.751730000 | -0.098328000 |
| 6  | -2.696697000 | -0.769942000 | 0.532949000  |
| 1  | -3.697928000 | -0.574492000 | 0.936732000  |
| 1  | -1.959378000 | -0.338784000 | 1.213859000  |
| 1  | -2.620812000 | -0.253133000 | -0.428299000 |
| 6  | -0.087220000 | 1.947675000  | -0.384370000 |
| 8  | 0.158663000  | 1.459408000  | -1.679467000 |
| 6  | -1.516984000 | 2.445023000  | -0.244399000 |
| 6  | -2.052587000 | 2.681200000  | 1.027396000  |
| 6  | -2.324788000 | 2.662297000  | -1.362093000 |
| 6  | -3.366129000 | 3.119106000  | 1.179679000  |
| 1  | -1.441040000 | 2.497385000  | 1.908194000  |
| 6  | -3.640564000 | 3.106549000  | -1.214438000 |

|   |              |              |              |
|---|--------------|--------------|--------------|
| 1 | -1.917570000 | 2.463314000  | -2.348159000 |
| 6 | -4.167555000 | 3.334569000  | 0.055950000  |
| 1 | -3.769430000 | 3.283259000  | 2.175235000  |
| 1 | -4.255797000 | 3.268883000  | -2.095522000 |
| 1 | -5.193540000 | 3.672124000  | 0.172571000  |
| 6 | 0.921472000  | 3.045480000  | -0.035288000 |
| 1 | 1.938709000  | 2.646145000  | -0.106507000 |
| 1 | 0.827217000  | 3.881306000  | -0.738395000 |
| 1 | 0.768819000  | 3.425914000  | 0.980553000  |
| 1 | 1.889892000  | -2.632374000 | 0.981445000  |

Al<sub>X=OMe</sub>

Coordinates (Angstroms)

|    | X            | Y            | Z            |
|----|--------------|--------------|--------------|
| 25 | 0.226498000  | -0.190821000 | -0.074286000 |
| 7  | 0.527744000  | 1.699120000  | -0.148334000 |
| 6  | -0.047532000 | -1.170895000 | 1.318384000  |
| 8  | -0.170297000 | -1.740233000 | 2.362970000  |
| 6  | -1.841797000 | 2.203554000  | 0.001147000  |
| 6  | 1.873063000  | 2.200384000  | -0.064985000 |
| 6  | -0.456852000 | 2.737125000  | -0.353495000 |
| 1  | -2.637247000 | 2.846333000  | -0.386829000 |
| 1  | -1.931663000 | 2.130262000  | 1.087666000  |
| 1  | -0.269794000 | 3.622431000  | 0.282806000  |
| 1  | -0.456053000 | 3.107576000  | -1.397394000 |
| 1  | 2.030198000  | 2.878771000  | 0.797641000  |
| 1  | 2.163416000  | 2.791696000  | -0.955687000 |
| 6  | 2.828126000  | 1.042661000  | 0.049199000  |
| 6  | 4.213933000  | 1.197560000  | 0.120505000  |
| 1  | 4.643131000  | 2.195056000  | 0.113027000  |
| 6  | 3.034119000  | -1.263924000 | 0.108670000  |
| 1  | 2.510316000  | -2.213349000 | 0.085378000  |
| 6  | 5.020227000  | 0.069150000  | 0.192394000  |
| 1  | 6.100062000  | 0.166525000  | 0.252205000  |
| 6  | 4.416963000  | -1.190057000 | 0.181587000  |
| 1  | 5.005978000  | -2.099866000 | 0.228010000  |
| 7  | 2.251621000  | -0.172647000 | 0.057540000  |
| 16 | -1.972557000 | 0.517042000  | -0.689554000 |
| 6  | -3.482509000 | -0.168449000 | 0.155550000  |
| 6  | -3.502303000 | -1.655245000 | -0.207833000 |
| 6  | -4.727485000 | 0.529269000  | -0.397855000 |
| 1  | -2.641929000 | -2.175161000 | 0.223336000  |
| 1  | -4.416802000 | -2.111894000 | 0.188338000  |



|   |              |              |              |
|---|--------------|--------------|--------------|
| 1 | -3.491393000 | -1.807965000 | -1.292697000 |
| 1 | -4.708489000 | 1.606367000  | -0.200319000 |
| 1 | -4.823565000 | 0.377623000  | -1.477920000 |
| 1 | -5.622911000 | 0.118520000  | 0.084739000  |
| 6 | -3.412825000 | -0.008220000 | 1.674811000  |
| 1 | -4.228595000 | -0.582383000 | 2.130934000  |
| 1 | -2.465748000 | -0.381966000 | 2.073149000  |
| 1 | -3.538291000 | 1.033546000  | 1.984403000  |
| 8 | 0.405311000  | -1.521764000 | -1.583293000 |
| 6 | 0.023010000  | -2.827858000 | -1.476542000 |
| 1 | 0.264353000  | -3.410747000 | -2.394363000 |
| 1 | 0.518185000  | -3.375542000 | -0.637624000 |
| 1 | -1.069186000 | -2.977659000 | -1.309870000 |

A2<sub>X=OMe</sub>

| -----                   |              |              |              |
|-------------------------|--------------|--------------|--------------|
| Coordinates (Angstroms) |              |              |              |
|                         | X            | Y            | Z            |
| -----                   |              |              |              |
| 25                      | -0.178043000 | -0.306707000 | -0.067450000 |
| 7                       | -0.538090000 | 1.743700000  | -0.348714000 |
| 6                       | 0.062020000  | -2.038002000 | 0.085768000  |
| 8                       | 0.211318000  | -3.210272000 | 0.163406000  |
| 6                       | 1.846277000  | 2.149640000  | -0.097494000 |
| 6                       | -1.847849000 | 2.006732000  | 0.191117000  |
| 6                       | 0.439048000  | 2.591224000  | 0.283636000  |
| 1                       | 2.610688000  | 2.769144000  | 0.380072000  |
| 1                       | 1.976675000  | 2.193647000  | -1.183888000 |
| 1                       | 0.337001000  | 3.659337000  | -0.001564000 |
| 1                       | 0.355823000  | 2.560348000  | 1.392131000  |
| 1                       | -2.286815000 | 2.973889000  | -0.127581000 |
| 1                       | -1.829298000 | 2.019223000  | 1.301850000  |
| 6                       | -2.786113000 | 0.898447000  | -0.193160000 |
| 6                       | -4.164290000 | 1.074613000  | -0.334610000 |
| 1                       | -4.593504000 | 2.061370000  | -0.189445000 |
| 6                       | -2.987051000 | -1.351386000 | -0.694487000 |
| 1                       | -2.475878000 | -2.298603000 | -0.833930000 |
| 6                       | -4.966347000 | -0.011952000 | -0.660714000 |
| 1                       | -6.039446000 | 0.108309000  | -0.775751000 |
| 6                       | -4.363487000 | -1.254991000 | -0.846534000 |
| 1                       | -4.942196000 | -2.135137000 | -1.105588000 |
| 7                       | -2.208546000 | -0.306616000 | -0.372866000 |
| 16                      | 2.011354000  | 0.415097000  | 0.457543000  |
| 6                       | 3.429064000  | -0.226217000 | -0.557484000 |
| 6                       | 3.782064000  | -1.578983000 | 0.069156000  |

|   |              |              |              |
|---|--------------|--------------|--------------|
| 6 | 4.619412000  | 0.729541000  | -0.442558000 |
| 1 | 2.922844000  | -2.257466000 | 0.064518000  |
| 1 | 4.588196000  | -2.049927000 | -0.505878000 |
| 1 | 4.125060000  | -1.463501000 | 1.102905000  |
| 1 | 4.423237000  | 1.686058000  | -0.937116000 |
| 1 | 4.874577000  | 0.926895000  | 0.604155000  |
| 1 | 5.494614000  | 0.279578000  | -0.926674000 |
| 6 | 3.038881000  | -0.419715000 | -2.022811000 |
| 1 | 3.919600000  | -0.737791000 | -2.594514000 |
| 1 | 2.268442000  | -1.188534000 | -2.124938000 |
| 1 | 2.663352000  | 0.504473000  | -2.474377000 |
| 8 | -0.563354000 | 0.066085000  | 1.905236000  |
| 6 | -0.136493000 | -0.822413000 | 2.849592000  |
| 1 | -0.296012000 | -0.438155000 | 3.882580000  |
| 1 | -0.656768000 | -1.809726000 | 2.813685000  |
| 1 | 0.951978000  | -1.066644000 | 2.789036000  |
| 1 | 0.133559000  | 0.064894000  | -1.714998000 |
| 1 | -0.004391000 | -0.720882000 | -1.743716000 |

**A3<sub>X=OMe</sub>**

Coordinates (Angstroms)

|    | X            | Y            | Z            |
|----|--------------|--------------|--------------|
| 25 | 1.101467000  | 0.804402000  | 0.196871000  |
| 1  | 0.568096000  | -0.219049000 | 1.447010000  |
| 7  | 0.165386000  | -0.223478000 | -1.401892000 |
| 6  | 1.820670000  | 1.686197000  | 1.532922000  |
| 8  | 2.294057000  | 2.277645000  | 2.435440000  |
| 6  | 2.278394000  | -1.377693000 | -1.783868000 |
| 6  | -0.874735000 | 0.651303000  | -1.931881000 |
| 6  | 1.107696000  | -0.656158000 | -2.432646000 |
| 1  | 2.996928000  | -1.708244000 | -2.537854000 |
| 1  | 1.915579000  | -2.244865000 | -1.224210000 |
| 1  | 0.631351000  | -1.333911000 | -3.157751000 |
| 1  | 1.465864000  | 0.230083000  | -2.967428000 |
| 1  | -1.619820000 | 0.105747000  | -2.529059000 |
| 1  | -0.396147000 | 1.404152000  | -2.567593000 |
| 6  | -1.551851000 | 1.378841000  | -0.804782000 |
| 6  | -2.850912000 | 1.872534000  | -0.918617000 |
| 1  | -3.408380000 | 1.699797000  | -1.833495000 |
| 6  | -1.374489000 | 2.207697000  | 1.343000000  |
| 1  | -0.755255000 | 2.311372000  | 2.227930000  |
| 6  | -3.412768000 | 2.563707000  | 0.145531000  |
| 1  | -4.423975000 | 2.953134000  | 0.078715000  |

|    |              |              |              |
|----|--------------|--------------|--------------|
| 6  | -2.659138000 | 2.730216000  | 1.305869000  |
| 1  | -3.056448000 | 3.249143000  | 2.171277000  |
| 7  | -0.819027000 | 1.553440000  | 0.310753000  |
| 16 | 3.075206000  | -0.202609000 | -0.628961000 |
| 6  | 4.048846000  | -1.321460000 | 0.492801000  |
| 6  | 4.891049000  | -0.378023000 | 1.356851000  |
| 6  | 4.961941000  | -2.210901000 | -0.355629000 |
| 1  | 4.259818000  | 0.281271000  | 1.960714000  |
| 1  | 5.511719000  | -0.970933000 | 2.038652000  |
| 1  | 5.555311000  | 0.242404000  | 0.745670000  |
| 1  | 4.389961000  | -2.922832000 | -0.958868000 |
| 1  | 5.591714000  | -1.614933000 | -1.024782000 |
| 1  | 5.618620000  | -2.790012000 | 0.304310000  |
| 6  | 3.147741000  | -2.175455000 | 1.384385000  |
| 1  | 3.772912000  | -2.835350000 | 1.998304000  |
| 1  | 2.549357000  | -1.553206000 | 2.054667000  |
| 1  | 2.469419000  | -2.807484000 | 0.802609000  |
| 1  | 0.791372000  | -0.729279000 | 0.862479000  |
| 1  | -1.251291000 | -1.531111000 | 1.476274000  |
| 1  | -0.289054000 | -1.091493000 | -0.986274000 |
| 6  | -1.693712000 | -2.245689000 | 0.738124000  |
| 8  | -0.884290000 | -2.458628000 | -0.333800000 |
| 6  | -3.057000000 | -1.624462000 | 0.384220000  |
| 6  | -3.822858000 | -0.957474000 | 1.348172000  |
| 6  | -3.570850000 | -1.730585000 | -0.910423000 |
| 6  | -5.073144000 | -0.426647000 | 1.035084000  |
| 1  | -3.426859000 | -0.842853000 | 2.356252000  |
| 6  | -4.823113000 | -1.203893000 | -1.232472000 |
| 1  | -2.957295000 | -2.224005000 | -1.659438000 |
| 6  | -5.582063000 | -0.551879000 | -0.259609000 |
| 1  | -5.646776000 | 0.095753000  | 1.796652000  |
| 1  | -5.206670000 | -1.297265000 | -2.245719000 |
| 1  | -6.553580000 | -0.133832000 | -0.508757000 |
| 6  | -1.952703000 | -3.546581000 | 1.534074000  |
| 1  | -0.993464000 | -3.969362000 | 1.854961000  |
| 1  | -2.573590000 | -3.384347000 | 2.425437000  |
| 1  | -2.453017000 | -4.282568000 | 0.891278000  |
| 8  | 1.450882000  | 2.185017000  | -1.254131000 |
| 6  | 2.362374000  | 3.181835000  | -1.034411000 |
| 1  | 2.557523000  | 3.771995000  | -1.956042000 |
| 1  | 2.040869000  | 3.921944000  | -0.264491000 |
| 1  | 3.359290000  | 2.817266000  | -0.692106000 |

TSA3-4<sub>X=OMe</sub>

-----  
 Coordinates (Angstroms)  
 -----

|    | X            | Y            | Z            |
|----|--------------|--------------|--------------|
| 25 | -1.138768000 | 0.906778000  | -0.047410000 |
| 1  | -0.859943000 | -0.159975000 | -1.492014000 |
| 7  | -0.099167000 | -0.210499000 | 1.323352000  |
| 6  | -1.969877000 | 1.864315000  | -1.340969000 |
| 8  | -2.487588000 | 2.464225000  | -2.182270000 |
| 6  | -2.091247000 | -1.526439000 | 1.753006000  |
| 6  | 0.965275000  | 0.626219000  | 1.847185000  |
| 6  | -0.931670000 | -0.765410000 | 2.379252000  |
| 1  | -2.756368000 | -1.942221000 | 2.512594000  |
| 1  | -1.712590000 | -2.330018000 | 1.115632000  |
| 1  | -0.363597000 | -1.468990000 | 3.009652000  |
| 1  | -1.312656000 | 0.032176000  | 3.034147000  |
| 1  | 1.748194000  | 0.046888000  | 2.358835000  |
| 1  | 0.564560000  | 1.357131000  | 2.566213000  |
| 6  | 1.571464000  | 1.393686000  | 0.709388000  |
| 6  | 2.883954000  | 1.860322000  | 0.716327000  |
| 1  | 3.518908000  | 1.649612000  | 1.570124000  |
| 6  | 1.219820000  | 2.293599000  | -1.403703000 |
| 1  | 0.526173000  | 2.440015000  | -2.224307000 |
| 6  | 3.362313000  | 2.560808000  | -0.381680000 |
| 1  | 4.385570000  | 2.922566000  | -0.399429000 |
| 6  | 2.516036000  | 2.776546000  | -1.468835000 |
| 1  | 2.850034000  | 3.308406000  | -2.352254000 |
| 7  | 0.753407000  | 1.621816000  | -0.337921000 |
| 16 | -3.031543000 | -0.347821000 | 0.713701000  |
| 6  | -3.941321000 | -1.437008000 | -0.494052000 |
| 6  | -4.936915000 | -0.507600000 | -1.192687000 |
| 6  | -4.687239000 | -2.512627000 | 0.300532000  |
| 1  | -4.429734000 | 0.310820000  | -1.713494000 |
| 1  | -5.495630000 | -1.081636000 | -1.940281000 |
| 1  | -5.654949000 | -0.079825000 | -0.485739000 |
| 1  | -4.000061000 | -3.235442000 | 0.750403000  |
| 1  | -5.306730000 | -2.077142000 | 1.091128000  |
| 1  | -5.344269000 | -3.062361000 | -0.382568000 |
| 6  | -3.005475000 | -2.077195000 | -1.518578000 |
| 1  | -3.572862000 | -2.810575000 | -2.103235000 |
| 1  | -2.608475000 | -1.332275000 | -2.213635000 |
| 1  | -2.165290000 | -2.598230000 | -1.048628000 |
| 1  | -0.614070000 | -0.625011000 | -0.915584000 |
| 1  | 1.331339000  | -1.134770000 | -1.650406000 |
| 1  | 0.391444000  | -1.219588000 | 0.643684000  |
| 6  | 1.625495000  | -1.967108000 | -0.977858000 |

|   |              |              |              |
|---|--------------|--------------|--------------|
| 8 | 0.672882000  | -2.177536000 | 0.007085000  |
| 6 | 3.000159000  | -1.581075000 | -0.431772000 |
| 6 | 3.953716000  | -0.996583000 | -1.273942000 |
| 6 | 3.337198000  | -1.805801000 | 0.903723000  |
| 6 | 5.212374000  | -0.641933000 | -0.793822000 |
| 1 | 3.701504000  | -0.802987000 | -2.314971000 |
| 6 | 4.596120000  | -1.450458000 | 1.392041000  |
| 1 | 2.593141000  | -2.246854000 | 1.560495000  |
| 6 | 5.538350000  | -0.866864000 | 0.545706000  |
| 1 | 5.936713000  | -0.182365000 | -1.461014000 |
| 1 | 4.838168000  | -1.625576000 | 2.437079000  |
| 1 | 6.516347000  | -0.585167000 | 0.925859000  |
| 6 | 1.735848000  | -3.222167000 | -1.851826000 |
| 1 | 0.759674000  | -3.447245000 | -2.294706000 |
| 1 | 2.463701000  | -3.094711000 | -2.661359000 |
| 1 | 2.044061000  | -4.077779000 | -1.239481000 |
| 8 | -1.457353000 | 2.091292000  | 1.346265000  |
| 6 | -2.066174000 | 3.326706000  | 1.159114000  |
| 1 | -2.107806000 | 3.870070000  | 2.116887000  |
| 1 | -1.516909000 | 3.970014000  | 0.447237000  |
| 1 | -3.106146000 | 3.242045000  | 0.793222000  |

**A4<sub>X=OMe</sub>**

| Coordinates (Angstroms) |              |              |              |
|-------------------------|--------------|--------------|--------------|
|                         | X            | Y            | Z            |
| 25                      | -1.127352000 | 0.802204000  | -0.189958000 |
| 1                       | -0.690916000 | -0.208616000 | -1.500419000 |
| 7                       | -0.140241000 | -0.236815000 | 1.371808000  |
| 6                       | -1.880491000 | 1.700621000  | -1.496671000 |
| 8                       | -2.373080000 | 2.305517000  | -2.380210000 |
| 6                       | -2.221834000 | -1.438638000 | 1.774301000  |
| 6                       | 0.893169000  | 0.651483000  | 1.892339000  |
| 6                       | -1.049713000 | -0.710422000 | 2.413387000  |
| 1                       | -2.916130000 | -1.800913000 | 2.536510000  |
| 1                       | -1.856316000 | -2.285227000 | 1.185731000  |
| 1                       | -0.543425000 | -1.394134000 | 3.112031000  |
| 1                       | -1.410753000 | 0.157399000  | 2.975834000  |
| 1                       | 1.653044000  | 0.117730000  | 2.481051000  |
| 1                       | 0.408211000  | 1.397012000  | 2.531688000  |
| 6                       | 1.544930000  | 1.386099000  | 0.754983000  |
| 6                       | 2.846425000  | 1.878740000  | 0.838807000  |
| 1                       | 3.425102000  | 1.704306000  | 1.740088000  |
| 6                       | 1.317151000  | 2.217842000  | -1.386829000 |

|    |              |              |              |
|----|--------------|--------------|--------------|
| 1  | 0.676545000  | 2.324917000  | -2.255976000 |
| 6  | 3.384562000  | 2.568898000  | -0.238579000 |
| 1  | 4.397741000  | 2.956581000  | -0.195679000 |
| 6  | 2.604190000  | 2.736234000  | -1.381006000 |
| 1  | 2.981443000  | 3.255010000  | -2.255459000 |
| 7  | 0.785384000  | 1.563275000  | -0.342424000 |
| 16 | -3.065803000 | -0.251389000 | 0.666345000  |
| 6  | -4.059785000 | -1.358456000 | -0.448143000 |
| 6  | -4.928044000 | -0.406559000 | -1.276364000 |
| 6  | -4.945789000 | -2.267181000 | 0.408296000  |
| 1  | -4.314074000 | 0.262652000  | -1.887133000 |
| 1  | -5.563794000 | -0.992679000 | -1.950062000 |
| 1  | -5.578700000 | 0.203578000  | -0.640563000 |
| 1  | -4.354224000 | -2.980168000 | 0.991074000  |
| 1  | -5.566897000 | -1.685518000 | 1.097790000  |
| 1  | -5.610561000 | -2.845384000 | -0.244308000 |
| 6  | -3.176343000 | -2.191821000 | -1.375921000 |
| 1  | -3.813511000 | -2.838292000 | -1.991876000 |
| 1  | -2.590364000 | -1.555144000 | -2.043420000 |
| 1  | -2.487400000 | -2.836691000 | -0.821972000 |
| 1  | -0.721301000 | -0.721782000 | -0.882345000 |
| 1  | 1.374502000  | -1.228661000 | -1.537968000 |
| 1  | 0.314643000  | -1.079576000 | 0.911438000  |
| 6  | 1.747135000  | -2.069404000 | -0.898861000 |
| 8  | 0.879021000  | -2.387488000 | 0.098123000  |
| 6  | 3.118530000  | -1.575322000 | -0.400823000 |
| 6  | 4.026358000  | -0.946877000 | -1.263398000 |
| 6  | 3.484192000  | -1.736993000 | 0.936705000  |
| 6  | 5.262767000  | -0.495592000 | -0.804771000 |
| 1  | 3.753914000  | -0.791973000 | -2.306255000 |
| 6  | 4.721486000  | -1.289071000 | 1.405067000  |
| 1  | 2.764899000  | -2.205900000 | 1.602631000  |
| 6  | 5.617027000  | -0.665578000 | 0.536124000  |
| 1  | 5.947182000  | -0.001042000 | -1.489526000 |
| 1  | 4.983291000  | -1.420842000 | 2.452228000  |
| 1  | 6.576912000  | -0.308076000 | 0.899160000  |
| 6  | 1.968588000  | -3.252302000 | -1.869171000 |
| 1  | 1.001724000  | -3.562923000 | -2.282053000 |
| 1  | 2.636534000  | -3.003390000 | -2.704529000 |
| 1  | 2.395713000  | -4.104404000 | -1.324664000 |
| 8  | -1.463430000 | 2.156122000  | 1.292132000  |
| 6  | -2.404448000 | 3.133405000  | 1.114470000  |
| 1  | -2.580184000 | 3.710101000  | 2.048526000  |
| 1  | -2.128084000 | 3.887709000  | 0.341266000  |

|   |              |             |             |
|---|--------------|-------------|-------------|
| 1 | -3.404582000 | 2.748427000 | 0.804907000 |
|---|--------------|-------------|-------------|

**TSA4-5<sub>X=OMe</sub>**

| Coordinates (Angstroms) |              |              |              |
|-------------------------|--------------|--------------|--------------|
|                         | X            | Y            | Z            |
| 25                      | -1.049022000 | 0.809333000  | -0.229301000 |
| 1                       | -0.675967000 | -0.527009000 | -1.283826000 |
| 7                       | -0.092484000 | -0.094501000 | 1.454030000  |
| 6                       | -1.743842000 | 1.549082000  | -1.647833000 |
| 8                       | -2.193246000 | 2.028267000  | -2.634330000 |
| 6                       | -2.169444000 | -1.298729000 | 1.880910000  |
| 6                       | 0.920948000  | 0.845887000  | 1.918866000  |
| 6                       | -1.012199000 | -0.530666000 | 2.502850000  |
| 1                       | -2.869801000 | -1.626083000 | 2.653472000  |
| 1                       | -1.795397000 | -2.174206000 | 1.341382000  |
| 1                       | -0.511113000 | -1.169440000 | 3.245512000  |
| 1                       | -1.389323000 | 0.362443000  | 3.011602000  |
| 1                       | 1.662578000  | 0.383883000  | 2.585714000  |
| 1                       | 0.400011000  | 1.644331000  | 2.457692000  |
| 6                       | 1.603890000  | 1.466023000  | 0.731015000  |
| 6                       | 2.907643000  | 1.953760000  | 0.800885000  |
| 1                       | 3.462444000  | 1.861725000  | 1.729032000  |
| 6                       | 1.435550000  | 2.087501000  | -1.484573000 |
| 1                       | 0.817323000  | 2.113320000  | -2.375872000 |
| 6                       | 3.477896000  | 2.536496000  | -0.323428000 |
| 1                       | 4.493016000  | 2.920396000  | -0.292554000 |
| 6                       | 2.725952000  | 2.598638000  | -1.494854000 |
| 1                       | 3.127692000  | 3.032277000  | -2.404211000 |
| 7                       | 0.871566000  | 1.537489000  | -0.397561000 |
| 16                      | -3.002522000 | -0.172662000 | 0.704705000  |
| 6                       | -4.032364000 | -1.329282000 | -0.323049000 |
| 6                       | -4.905459000 | -0.408594000 | -1.181491000 |
| 6                       | -4.911583000 | -2.183000000 | 0.594072000  |
| 1                       | -4.292919000 | 0.247251000  | -1.808520000 |
| 1                       | -5.536775000 | -1.017036000 | -1.839654000 |
| 1                       | -5.560244000 | 0.215577000  | -0.563743000 |
| 1                       | -4.316664000 | -2.876207000 | 1.197249000  |
| 1                       | -5.511248000 | -1.562355000 | 1.268497000  |
| 1                       | -5.596949000 | -2.782160000 | -0.017399000 |
| 6                       | -3.177170000 | -2.220796000 | -1.222350000 |
| 1                       | -3.831245000 | -2.902069000 | -1.780575000 |
| 1                       | -2.606434000 | -1.624760000 | -1.938521000 |
| 1                       | -2.469082000 | -2.827287000 | -0.649458000 |

|   |              |              |              |
|---|--------------|--------------|--------------|
| 1 | -0.239243000 | -1.122869000 | -0.780715000 |
| 1 | 1.502402000  | -1.311436000 | -1.941208000 |
| 1 | 0.357008000  | -0.918829000 | 1.023289000  |
| 6 | 1.681142000  | -2.067049000 | -1.139982000 |
| 8 | 0.591804000  | -2.148291000 | -0.304007000 |
| 6 | 2.959324000  | -1.615819000 | -0.427690000 |
| 6 | 4.017995000  | -1.044929000 | -1.143741000 |
| 6 | 3.108253000  | -1.787604000 | 0.950777000  |
| 6 | 5.195384000  | -0.661738000 | -0.503433000 |
| 1 | 3.911527000  | -0.886558000 | -2.215418000 |
| 6 | 4.283429000  | -1.405497000 | 1.599079000  |
| 1 | 2.281361000  | -2.215335000 | 1.510919000  |
| 6 | 5.333809000  | -0.841603000 | 0.874151000  |
| 1 | 6.001383000  | -0.210435000 | -1.076217000 |
| 1 | 4.378656000  | -1.544461000 | 2.673024000  |
| 1 | 6.247508000  | -0.537901000 | 1.377439000  |
| 6 | 1.940910000  | -3.406897000 | -1.852605000 |
| 1 | 1.039333000  | -3.707662000 | -2.397789000 |
| 1 | 2.773224000  | -3.347292000 | -2.565252000 |
| 1 | 2.171461000  | -4.184778000 | -1.114157000 |
| 8 | -1.410899000 | 2.296265000  | 1.147937000  |
| 6 | -2.379768000 | 3.221935000  | 0.883191000  |
| 1 | -2.550648000 | 3.907235000  | 1.743797000  |
| 1 | -2.146190000 | 3.883881000  | 0.015335000  |
| 1 | -3.378399000 | 2.779555000  | 0.651696000  |

**A5<sub>X=OMe</sub>**

| Coordinates (Angstroms) |              |              |              |
|-------------------------|--------------|--------------|--------------|
|                         | X            | Y            | Z            |
| 25                      | -0.912250000 | -0.909349000 | 0.275602000  |
| 1                       | -0.488503000 | 0.415297000  | 1.250425000  |
| 7                       | 0.079028000  | 0.041091000  | -1.405081000 |
| 1                       | 0.532699000  | 0.880421000  | -1.048185000 |
| 6                       | -1.625003000 | -1.699416000 | 1.643586000  |
| 8                       | -2.088580000 | -2.219457000 | 2.609467000  |
| 6                       | -2.040740000 | 1.181305000  | -1.868001000 |
| 6                       | 1.100529000  | -0.898739000 | -1.866587000 |
| 6                       | -0.856159000 | 0.435742000  | -2.463768000 |
| 1                       | -2.734897000 | 1.474963000  | -2.659899000 |
| 1                       | -1.700433000 | 2.079358000  | -1.343339000 |
| 1                       | -0.370050000 | 1.069661000  | -3.219992000 |
| 1                       | -1.204179000 | -0.484068000 | -2.941713000 |
| 1                       | 1.871053000  | -0.418771000 | -2.485327000 |



|    |              |              |              |
|----|--------------|--------------|--------------|
| 1  | 0.585029000  | -1.660720000 | -2.458132000 |
| 6  | 1.733315000  | -1.596988000 | -0.693871000 |
| 6  | 3.011116000  | -2.147356000 | -0.775699000 |
| 1  | 3.581113000  | -2.033952000 | -1.692413000 |
| 6  | 1.501354000  | -2.334731000 | 1.478576000  |
| 1  | 0.868637000  | -2.379536000 | 2.358724000  |
| 6  | 3.536363000  | -2.823239000 | 0.318583000  |
| 1  | 4.529087000  | -3.260668000 | 0.275707000  |
| 6  | 2.764266000  | -2.911120000 | 1.475066000  |
| 1  | 3.128423000  | -3.415600000 | 2.363667000  |
| 7  | 0.977725000  | -1.698086000 | 0.417851000  |
| 16 | -2.867449000 | 0.060956000  | -0.680697000 |
| 6  | -3.927391000 | 1.230082000  | 0.303333000  |
| 6  | -4.764115000 | 0.318396000  | 1.206562000  |
| 6  | -4.841429000 | 2.014332000  | -0.641939000 |
| 1  | -4.126162000 | -0.293578000 | 1.852208000  |
| 1  | -5.409682000 | 0.931663000  | 1.846337000  |
| 1  | -5.403878000 | -0.349571000 | 0.619281000  |
| 1  | -4.272492000 | 2.699026000  | -1.279264000 |
| 1  | -5.425554000 | 1.347147000  | -1.285015000 |
| 1  | -5.541848000 | 2.618223000  | -0.052105000 |
| 6  | -3.100895000 | 2.190085000  | 1.157097000  |
| 1  | -3.777932000 | 2.834835000  | 1.731768000  |
| 1  | -2.460663000 | 1.643892000  | 1.853907000  |
| 1  | -2.459307000 | 2.835598000  | 0.549932000  |
| 1  | 1.299410000  | 2.261556000  | 2.122595000  |
| 1  | -0.147675000 | 1.695960000  | 0.655787000  |
| 6  | 1.445130000  | 2.712438000  | 1.130106000  |
| 8  | 0.259578000  | 2.563989000  | 0.370891000  |
| 6  | 2.629744000  | 2.013979000  | 0.477177000  |
| 6  | 3.522115000  | 1.259894000  | 1.243310000  |
| 6  | 2.868026000  | 2.151000000  | -0.894376000 |
| 6  | 4.641408000  | 0.668998000  | 0.657282000  |
| 1  | 3.335365000  | 1.127825000  | 2.306646000  |
| 6  | 3.982424000  | 1.557528000  | -1.485218000 |
| 1  | 2.172173000  | 2.724353000  | -1.502004000 |
| 6  | 4.876482000  | 0.818861000  | -0.708744000 |
| 1  | 5.320296000  | 0.078106000  | 1.265818000  |
| 1  | 4.153289000  | 1.671565000  | -2.552219000 |
| 1  | 5.742981000  | 0.352028000  | -1.168388000 |
| 6  | 1.720072000  | 4.201851000  | 1.307184000  |
| 1  | 0.883014000  | 4.680023000  | 1.825633000  |
| 1  | 2.632062000  | 4.361585000  | 1.891754000  |
| 1  | 1.847725000  | 4.685350000  | 0.331923000  |

|   |              |              |              |
|---|--------------|--------------|--------------|
| 8 | -1.273565000 | -2.314170000 | -1.244716000 |
| 6 | -2.120396000 | -3.344718000 | -0.960793000 |
| 1 | -2.297202000 | -4.003700000 | -1.842650000 |
| 1 | -1.754186000 | -4.022819000 | -0.152314000 |
| 1 | -3.136312000 | -3.020091000 | -0.625770000 |

**TSA2-6<sub>X=OMe</sub>**

| -----                   |              |              |              |
|-------------------------|--------------|--------------|--------------|
| Coordinates (Angstroms) |              |              |              |
|                         | X            | Y            | Z            |
| -----                   |              |              |              |
| 25                      | 0.183032000  | 0.297166000  | -0.063956000 |
| 1                       | -0.023977000 | 0.004521000  | -1.755585000 |
| 7                       | 0.561271000  | -1.783140000 | -0.354171000 |
| 1                       | 0.234170000  | -0.842880000 | -1.335379000 |
| 6                       | -0.120090000 | 2.009853000  | -0.164765000 |
| 8                       | -0.332228000 | 3.171564000  | -0.290532000 |
| 6                       | -1.840304000 | -2.154027000 | -0.132584000 |
| 6                       | 1.886626000  | -2.036538000 | 0.148423000  |
| 6                       | -0.441802000 | -2.640071000 | 0.225907000  |
| 1                       | -2.603366000 | -2.793619000 | 0.318528000  |
| 1                       | -1.976117000 | -2.151816000 | -1.218920000 |
| 1                       | -0.351652000 | -3.687829000 | -0.118145000 |
| 1                       | -0.346606000 | -2.662537000 | 1.328650000  |
| 1                       | 2.328563000  | -2.978420000 | -0.225088000 |
| 1                       | 1.869585000  | -2.108998000 | 1.253234000  |
| 6                       | 2.807690000  | -0.895344000 | -0.189207000 |
| 6                       | 4.188292000  | -1.058872000 | -0.310302000 |
| 1                       | 4.621385000  | -2.047956000 | -0.196952000 |
| 6                       | 2.998544000  | 1.371955000  | -0.591960000 |
| 1                       | 2.484019000  | 2.320501000  | -0.703779000 |
| 6                       | 4.988650000  | 0.046698000  | -0.571010000 |
| 1                       | 6.064749000  | -0.060829000 | -0.667812000 |
| 6                       | 4.379071000  | 1.291485000  | -0.714086000 |
| 1                       | 4.955195000  | 2.187004000  | -0.920746000 |
| 7                       | 2.220637000  | 0.308925000  | -0.333763000 |
| 16                      | -2.001006000 | -0.441573000 | 0.492771000  |
| 6                       | -3.438834000 | 0.219679000  | -0.481608000 |
| 6                       | -3.768360000 | 1.563027000  | 0.176899000  |
| 6                       | -4.630737000 | -0.732294000 | -0.352342000 |
| 1                       | -2.912056000 | 2.243937000  | 0.144995000  |
| 1                       | -4.599375000 | 2.038259000  | -0.357670000 |
| 1                       | -4.067487000 | 1.432689000  | 1.222488000  |
| 1                       | -4.449864000 | -1.683975000 | -0.861979000 |

|   |              |              |              |
|---|--------------|--------------|--------------|
| 1 | -4.864854000 | -0.940614000 | 0.697236000  |
| 1 | -5.513878000 | -0.273085000 | -0.812725000 |
| 6 | -3.082172000 | 0.433637000  | -1.952183000 |
| 1 | -3.963243000 | 0.811300000  | -2.485824000 |
| 1 | -2.273007000 | 1.160637000  | -2.059378000 |
| 1 | -2.771219000 | -0.496785000 | -2.438106000 |
| 8 | 0.571911000  | 0.064249000  | 1.933004000  |
| 6 | 0.120359000  | 1.017900000  | 2.797743000  |
| 1 | -0.980759000 | 1.201366000  | 2.739343000  |
| 1 | 0.320164000  | 0.753175000  | 3.861581000  |
| 1 | 0.587523000  | 2.022431000  | 2.648806000  |

A6<sub>X=OMe</sub>

| -----                   |              |              |              |
|-------------------------|--------------|--------------|--------------|
| Coordinates (Angstroms) |              |              |              |
|                         | X            | Y            | Z            |
| -----                   |              |              |              |
| 25                      | 0.187395000  | 0.371761000  | -0.121110000 |
| 1                       | -0.007316000 | 0.465422000  | -1.828376000 |
| 7                       | 0.520657000  | -1.764103000 | -0.357976000 |
| 1                       | 0.481552000  | -1.962965000 | -1.354038000 |
| 6                       | -0.004841000 | 2.081882000  | 0.093479000  |
| 8                       | -0.118955000 | 3.259618000  | 0.228349000  |
| 6                       | -1.890829000 | -2.091832000 | -0.034414000 |
| 6                       | 1.875779000  | -2.022772000 | 0.135366000  |
| 6                       | -0.494744000 | -2.570642000 | 0.330185000  |
| 1                       | -2.639329000 | -2.690440000 | 0.491560000  |
| 1                       | -2.058677000 | -2.191034000 | -1.111096000 |
| 1                       | -0.400814000 | -3.638603000 | 0.085272000  |
| 1                       | -0.328398000 | -2.432506000 | 1.401529000  |
| 1                       | 2.282209000  | -2.979418000 | -0.219159000 |
| 1                       | 1.809140000  | -2.044653000 | 1.226979000  |
| 6                       | 2.796290000  | -0.889968000 | -0.231232000 |
| 6                       | 4.168576000  | -1.083150000 | -0.384439000 |
| 1                       | 4.583164000  | -2.081237000 | -0.280439000 |
| 6                       | 3.018473000  | 1.368167000  | -0.644870000 |
| 1                       | 2.517824000  | 2.324037000  | -0.756461000 |
| 6                       | 4.985471000  | 0.005690000  | -0.667024000 |
| 1                       | 6.056450000  | -0.122821000 | -0.789394000 |
| 6                       | 4.393997000  | 1.259996000  | -0.799198000 |
| 1                       | 4.980877000  | 2.144036000  | -1.024575000 |
| 7                       | 2.222689000  | 0.323021000  | -0.362787000 |
| 16                      | -2.033193000 | -0.331895000 | 0.445207000  |
| 6                       | -3.495213000 | 0.239376000  | -0.550651000 |
| 6                       | -3.687561000 | 1.701125000  | -0.133313000 |

|   |              |              |              |
|---|--------------|--------------|--------------|
| 6 | -4.725957000 | -0.586352000 | -0.166192000 |
| 1 | -2.804700000 | 2.299237000  | -0.379625000 |
| 1 | -4.548154000 | 2.123599000  | -0.664981000 |
| 1 | -3.876191000 | 1.792292000  | 0.942113000  |
| 1 | -4.622692000 | -1.633321000 | -0.470023000 |
| 1 | -4.905471000 | -0.556572000 | 0.913812000  |
| 1 | -5.611761000 | -0.181076000 | -0.670346000 |
| 6 | -3.251192000 | 0.163893000  | -2.057382000 |
| 1 | -4.123336000 | 0.572439000  | -2.582830000 |
| 1 | -2.367384000 | 0.740964000  | -2.341513000 |
| 1 | -3.111654000 | -0.864983000 | -2.404721000 |
| 8 | 0.494680000  | -0.221972000 | 1.875773000  |
| 6 | 0.268812000  | 0.708349000  | 2.848187000  |
| 1 | 0.374310000  | 0.282155000  | 3.873075000  |
| 1 | 0.968567000  | 1.577970000  | 2.814371000  |
| 1 | -0.753581000 | 1.157596000  | 2.814685000  |

**A7R<sub>X=OMe</sub>**

| -----                   |              |              |              |
|-------------------------|--------------|--------------|--------------|
| Coordinates (Angstroms) |              |              |              |
|                         | X            | Y            | Z            |
| -----                   |              |              |              |
| 25                      | -0.754799000 | -0.784873000 | 0.387006000  |
| 1                       | -0.123069000 | 0.768603000  | 0.640163000  |
| 7                       | -0.384105000 | -0.491189000 | -1.728286000 |
| 1                       | 0.078984000  | 0.410006000  | -1.828778000 |
| 6                       | -0.972188000 | -1.043561000 | 2.086637000  |
| 8                       | -1.088537000 | -1.200245000 | 3.263194000  |
| 6                       | -2.634609000 | 0.456854000  | -1.908228000 |
| 6                       | 0.546203000  | -1.544230000 | -2.135920000 |
| 6                       | -1.611343000 | -0.479765000 | -2.530369000 |
| 1                       | -3.546313000 | 0.473058000  | -2.511360000 |
| 1                       | -2.231803000 | 1.472531000  | -1.849910000 |
| 1                       | -1.416895000 | -0.168897000 | -3.567632000 |
| 1                       | -2.001175000 | -1.501338000 | -2.534039000 |
| 1                       | 1.053603000  | -1.320310000 | -3.084455000 |
| 1                       | -0.043175000 | -2.458948000 | -2.250704000 |
| 6                       | 1.550888000  | -1.803623000 | -1.047065000 |
| 6                       | 2.801867000  | -2.355780000 | -1.321243000 |
| 1                       | 3.082771000  | -2.552377000 | -2.351575000 |
| 6                       | 1.998008000  | -1.790385000 | 1.214053000  |
| 1                       | 1.644694000  | -1.535113000 | 2.207313000  |
| 6                       | 3.664024000  | -2.650793000 | -0.272414000 |
| 1                       | 4.639517000  | -3.088265000 | -0.461716000 |
| 6                       | 3.250524000  | -2.357705000 | 1.025387000  |

|    |              |              |              |
|----|--------------|--------------|--------------|
| 1  | 3.885875000  | -2.555177000 | 1.882171000  |
| 7  | 1.148419000  | -1.522321000 | 0.207951000  |
| 16 | -2.994582000 | -0.150698000 | -0.221370000 |
| 6  | -3.797702000 | 1.325123000  | 0.575339000  |
| 6  | -4.204857000 | 0.833973000  | 1.968394000  |
| 6  | -5.038543000 | 1.726682000  | -0.226431000 |
| 1  | -3.332441000 | 0.506850000  | 2.543145000  |
| 1  | -4.689103000 | 1.651143000  | 2.516061000  |
| 1  | -4.914234000 | 0.000946000  | 1.909909000  |
| 1  | -4.774789000 | 2.099650000  | -1.221623000 |
| 1  | -5.730080000 | 0.885657000  | -0.344627000 |
| 1  | -5.568512000 | 2.532115000  | 0.297078000  |
| 6  | -2.839408000 | 2.508487000  | 0.703902000  |
| 1  | -3.342062000 | 3.326672000  | 1.234981000  |
| 1  | -1.941729000 | 2.222665000  | 1.256858000  |
| 1  | -2.527652000 | 2.892347000  | -0.272598000 |
| 6  | 1.476350000  | 2.606336000  | -1.090630000 |
| 8  | 1.301252000  | 2.069483000  | -2.180164000 |
| 6  | 2.608616000  | 2.173437000  | -0.213829000 |
| 6  | 2.804100000  | 2.720781000  | 1.059619000  |
| 6  | 3.496883000  | 1.200349000  | -0.686605000 |
| 6  | 3.873379000  | 2.301745000  | 1.847248000  |
| 1  | 2.118480000  | 3.466282000  | 1.448563000  |
| 6  | 4.568471000  | 0.787268000  | 0.097388000  |
| 1  | 3.336543000  | 0.772177000  | -1.670817000 |
| 6  | 4.758382000  | 1.337351000  | 1.366086000  |
| 1  | 4.014086000  | 2.727291000  | 2.836202000  |
| 1  | 5.253959000  | 0.032915000  | -0.276073000 |
| 1  | 5.592482000  | 1.010994000  | 1.980684000  |
| 6  | 0.582250000  | 3.726930000  | -0.635005000 |
| 1  | -0.168979000 | 3.923698000  | -1.400989000 |
| 1  | 0.083576000  | 3.455893000  | 0.300433000  |
| 1  | 1.167171000  | 4.635197000  | -0.453689000 |
| 8  | -1.417997000 | -2.636213000 | -0.392016000 |
| 6  | -2.124125000 | -3.454138000 | 0.438786000  |
| 1  | -3.042292000 | -2.984237000 | 0.869948000  |
| 1  | -2.480572000 | -4.377165000 | -0.076350000 |
| 1  | -1.544538000 | -3.813523000 | 1.323809000  |

A7S<sub>X=OMe</sub>

-----  
Coordinates (Angstroms)

|    | X           | Y            | Z           |
|----|-------------|--------------|-------------|
| 25 | 0.827686000 | -0.973151000 | 0.342942000 |

-----

|    |              |              |              |
|----|--------------|--------------|--------------|
| 1  | -0.118254000 | 0.332761000  | 0.826231000  |
| 7  | 0.803679000  | -0.092881000 | -1.635902000 |
| 1  | 0.323732000  | 0.801007000  | -1.561889000 |
| 6  | 0.912556000  | -1.639054000 | 1.939511000  |
| 8  | 0.975857000  | -2.075895000 | 3.047820000  |
| 6  | -1.253824000 | -1.334805000 | -2.065233000 |
| 6  | 2.201925000  | 0.164108000  | -1.980542000 |
| 6  | 0.100659000  | -0.919888000 | -2.619222000 |
| 1  | -1.796424000 | -1.935399000 | -2.800024000 |
| 1  | -1.849436000 | -0.447872000 | -1.823927000 |
| 1  | -0.043034000 | -0.388660000 | -3.571886000 |
| 1  | 0.717244000  | -1.805514000 | -2.795220000 |
| 1  | 2.313489000  | 0.854590000  | -2.827341000 |
| 1  | 2.644676000  | -0.803164000 | -2.237697000 |
| 6  | 2.927722000  | 0.687624000  | -0.771086000 |
| 6  | 4.001426000  | 1.570321000  | -0.873600000 |
| 1  | 4.305688000  | 1.928880000  | -1.852237000 |
| 6  | 3.130628000  | 0.630394000  | 1.526213000  |
| 1  | 2.741065000  | 0.243204000  | 2.461790000  |
| 6  | 4.663515000  | 1.979954000  | 0.278577000  |
| 1  | 5.501621000  | 2.667846000  | 0.221840000  |
| 6  | 4.217222000  | 1.494222000  | 1.505847000  |
| 1  | 4.694532000  | 1.780391000  | 2.437039000  |
| 7  | 2.486247000  | 0.227546000  | 0.418097000  |
| 16 | -0.963561000 | -2.300638000 | -0.539151000 |
| 6  | -2.631603000 | -2.265516000 | 0.282132000  |
| 6  | -2.489403000 | -3.220088000 | 1.472246000  |
| 6  | -3.693840000 | -2.787581000 | -0.689085000 |
| 1  | -1.694808000 | -2.891031000 | 2.149964000  |
| 1  | -3.430050000 | -3.244818000 | 2.035118000  |
| 1  | -2.263697000 | -4.241191000 | 1.145333000  |
| 1  | -3.859027000 | -2.092889000 | -1.519147000 |
| 1  | -3.417196000 | -3.763044000 | -1.103295000 |
| 1  | -4.648223000 | -2.900594000 | -0.160324000 |
| 6  | -3.005477000 | -0.870072000 | 0.780075000  |
| 1  | -3.993432000 | -0.908863000 | 1.256532000  |
| 1  | -2.275444000 | -0.504651000 | 1.505654000  |
| 1  | -3.057363000 | -0.142259000 | -0.034930000 |
| 6  | -0.179429000 | 3.088030000  | -0.309021000 |
| 8  | 0.209207000  | 2.939531000  | -1.463184000 |
| 6  | -1.633321000 | 2.925690000  | 0.014698000  |
| 6  | -2.108098000 | 2.951193000  | 1.331075000  |
| 6  | -2.538241000 | 2.729603000  | -1.035884000 |
| 6  | -3.465486000 | 2.778011000  | 1.590418000  |

|   |              |              |              |
|---|--------------|--------------|--------------|
| 1 | -1.421111000 | 3.084479000  | 2.160244000  |
| 6 | -3.895143000 | 2.565554000  | -0.777442000 |
| 1 | -2.163889000 | 2.704057000  | -2.054406000 |
| 6 | -4.360910000 | 2.587662000  | 0.538200000  |
| 1 | -3.823518000 | 2.786294000  | 2.615468000  |
| 1 | -4.590105000 | 2.414579000  | -1.598161000 |
| 1 | -5.418688000 | 2.450294000  | 0.742753000  |
| 6 | 0.784547000  | 3.458898000  | 0.783323000  |
| 1 | 1.788959000  | 3.542890000  | 0.364839000  |
| 1 | 0.494544000  | 4.411978000  | 1.239484000  |
| 1 | 0.780028000  | 2.696880000  | 1.567445000  |
| 8 | 1.957192000  | -2.402403000 | -0.733861000 |
| 6 | 2.195804000  | -3.599074000 | -0.125117000 |
| 1 | 2.665099000  | -4.340040000 | -0.814494000 |
| 1 | 2.884778000  | -3.533603000 | 0.752055000  |
| 1 | 1.278166000  | -4.101208000 | 0.267992000  |

**TSA7-8R<sub>X=OMe</sub>**

Coordinates (Angstroms)

|    | X            | Y            | Z            |
|----|--------------|--------------|--------------|
| 25 | -0.594536000 | -0.579491000 | 0.397919000  |
| 1  | -0.161564000 | 1.036023000  | -0.033350000 |
| 7  | -0.416757000 | -0.946993000 | -1.693985000 |
| 1  | -0.031550000 | -0.068483000 | -2.054783000 |
| 6  | -0.630812000 | -0.147435000 | 2.074909000  |
| 8  | -0.623086000 | 0.210057000  | 3.212947000  |
| 6  | -2.759972000 | -0.259868000 | -1.919659000 |
| 6  | 0.577455000  | -2.002756000 | -1.871319000 |
| 6  | -1.684885000 | -1.238805000 | -2.367626000 |
| 1  | -3.707460000 | -0.492849000 | -2.413041000 |
| 1  | -2.472626000 | 0.765418000  | -2.173022000 |
| 1  | -1.584725000 | -1.191077000 | -3.462162000 |
| 1  | -1.976290000 | -2.256421000 | -2.090163000 |
| 1  | 0.997932000  | -2.028333000 | -2.886476000 |
| 1  | 0.073551000  | -2.954508000 | -1.674066000 |
| 6  | 1.674284000  | -1.862897000 | -0.851031000 |
| 6  | 2.940622000  | -2.407357000 | -1.060633000 |
| 1  | 3.163160000  | -2.891754000 | -2.006639000 |
| 6  | 2.272246000  | -1.156300000 | 1.259923000  |
| 1  | 1.971077000  | -0.634977000 | 2.161936000  |
| 6  | 3.893577000  | -2.328365000 | -0.052239000 |
| 1  | 4.884512000  | -2.749593000 | -0.191880000 |
| 6  | 3.547515000  | -1.690083000 | 1.136061000  |

|    |              |              |              |
|----|--------------|--------------|--------------|
| 1  | 4.254137000  | -1.592679000 | 1.953190000  |
| 7  | 1.342848000  | -1.234064000 | 0.293656000  |
| 16 | -2.919787000 | -0.415841000 | -0.105602000 |
| 6  | -3.914869000 | 1.081400000  | 0.358251000  |
| 6  | -4.147718000 | 0.929281000  | 1.865212000  |
| 6  | -5.250868000 | 1.063816000  | -0.388674000 |
| 1  | -3.198968000 | 0.904433000  | 2.410733000  |
| 1  | -4.732576000 | 1.780769000  | 2.232403000  |
| 1  | -4.701367000 | 0.012400000  | 2.095907000  |
| 1  | -5.113400000 | 1.210035000  | -1.465126000 |
| 1  | -5.785225000 | 0.120486000  | -0.233042000 |
| 1  | -5.886066000 | 1.880063000  | -0.023339000 |
| 6  | -3.162132000 | 2.378864000  | 0.078275000  |
| 1  | -3.754621000 | 3.230402000  | 0.436167000  |
| 1  | -2.194918000 | 2.383212000  | 0.585988000  |
| 1  | -2.989183000 | 2.525260000  | -0.992075000 |
| 6  | 0.957084000  | 2.098297000  | -1.228827000 |
| 8  | 0.886726000  | 1.549781000  | -2.343951000 |
| 6  | 2.221218000  | 1.935717000  | -0.413498000 |
| 6  | 2.326623000  | 2.348339000  | 0.920383000  |
| 6  | 3.350351000  | 1.412875000  | -1.049053000 |
| 6  | 3.540980000  | 2.255933000  | 1.594572000  |
| 1  | 1.450382000  | 2.716216000  | 1.445291000  |
| 6  | 4.567230000  | 1.317593000  | -0.375343000 |
| 1  | 3.262604000  | 1.086648000  | -2.080610000 |
| 6  | 4.668288000  | 1.745966000  | 0.946874000  |
| 1  | 3.606776000  | 2.573298000  | 2.631500000  |
| 1  | 5.435136000  | 0.905562000  | -0.882627000 |
| 1  | 5.614904000  | 1.671761000  | 1.474553000  |
| 6  | 0.121196000  | 3.333815000  | -0.967564000 |
| 1  | -0.839937000 | 3.234460000  | -1.473469000 |
| 1  | -0.045659000 | 3.538135000  | 0.090243000  |
| 1  | 0.657579000  | 4.188453000  | -1.403571000 |
| 8  | -1.102069000 | -2.608898000 | 0.408434000  |
| 6  | -1.614876000 | -3.115959000 | 1.565488000  |
| 1  | -2.535300000 | -2.590541000 | 1.922945000  |
| 1  | -1.904830000 | -4.188228000 | 1.467897000  |
| 1  | -0.905912000 | -3.075434000 | 2.428294000  |

TSA7-8S<sub>X=OMe</sub>

Coordinates (Angstroms)

|    | X            | Y           | Z           |
|----|--------------|-------------|-------------|
| 25 | -0.831577000 | 0.742680000 | 0.314612000 |



|    |              |              |              |
|----|--------------|--------------|--------------|
| 1  | 0.131204000  | -0.714708000 | 0.474582000  |
| 7  | -0.947927000 | 0.100062000  | -1.708361000 |
| 1  | -0.544148000 | -0.841364000 | -1.681716000 |
| 6  | -0.708581000 | 1.144574000  | 1.997452000  |
| 8  | -0.603689000 | 1.397068000  | 3.157809000  |
| 6  | 1.172004000  | 1.265130000  | -2.078666000 |
| 6  | -2.366564000 | -0.029739000 | -2.030375000 |
| 6  | -0.196989000 | 0.926056000  | -2.654811000 |
| 1  | 1.739006000  | 1.875425000  | -2.786695000 |
| 1  | 1.734596000  | 0.350761000  | -1.862751000 |
| 1  | -0.069513000 | 0.423270000  | -3.624899000 |
| 1  | -0.765208000 | 1.847470000  | -2.816692000 |
| 1  | -2.548724000 | -0.627931000 | -2.934277000 |
| 1  | -2.756350000 | 0.982345000  | -2.180693000 |
| 6  | -3.090542000 | -0.619946000 | -0.850475000 |
| 6  | -4.271178000 | -1.346685000 | -0.995039000 |
| 1  | -4.663449000 | -1.536908000 | -1.989402000 |
| 6  | -3.188985000 | -0.822943000 | 1.445759000  |
| 1  | -2.715123000 | -0.604491000 | 2.396891000  |
| 6  | -4.930116000 | -1.812501000 | 0.137125000  |
| 1  | -5.853837000 | -2.375889000 | 0.047011000  |
| 6  | -4.376026000 | -1.540815000 | 1.386316000  |
| 1  | -4.846389000 | -1.881808000 | 2.302325000  |
| 7  | -2.547203000 | -0.367731000 | 0.357573000  |
| 16 | 0.884403000  | 2.178246000  | -0.521979000 |
| 6  | 2.555781000  | 2.200316000  | 0.286087000  |
| 6  | 2.400004000  | 3.183938000  | 1.450854000  |
| 6  | 3.607424000  | 2.713898000  | -0.700001000 |
| 1  | 1.614658000  | 2.859472000  | 2.141329000  |
| 1  | 3.342128000  | 3.238676000  | 2.009139000  |
| 1  | 2.155974000  | 4.191611000  | 1.097142000  |
| 1  | 3.787028000  | 1.998489000  | -1.509139000 |
| 1  | 3.313021000  | 3.671907000  | -1.141969000 |
| 1  | 4.558676000  | 2.860352000  | -0.174044000 |
| 6  | 2.944794000  | 0.822778000  | 0.815049000  |
| 1  | 3.924836000  | 0.883693000  | 1.305271000  |
| 1  | 2.210450000  | 0.458114000  | 1.537905000  |
| 1  | 3.016401000  | 0.088565000  | 0.008649000  |
| 6  | 0.277642000  | -2.537999000 | -0.092135000 |
| 8  | -0.217431000 | -2.603982000 | -1.234711000 |
| 6  | 1.783597000  | -2.489982000 | 0.032864000  |
| 6  | 2.443297000  | -2.631220000 | 1.258599000  |
| 6  | 2.548402000  | -2.362484000 | -1.131740000 |
| 6  | 3.835628000  | -2.629220000 | 1.318709000  |

|   |              |              |              |
|---|--------------|--------------|--------------|
| 1 | 1.876635000  | -2.725985000 | 2.179365000  |
| 6 | 3.940349000  | -2.355449000 | -1.073917000 |
| 1 | 2.036019000  | -2.265720000 | -2.083726000 |
| 6 | 4.590071000  | -2.488789000 | 0.153602000  |
| 1 | 4.331949000  | -2.734306000 | 2.279304000  |
| 1 | 4.517489000  | -2.247418000 | -1.988151000 |
| 1 | 5.675273000  | -2.483461000 | 0.203048000  |
| 6 | -0.520328000 | -3.072074000 | 1.078925000  |
| 1 | -1.581719000 | -2.926530000 | 0.875442000  |
| 1 | -0.325491000 | -4.150604000 | 1.159292000  |
| 1 | -0.271480000 | -2.600722000 | 2.030138000  |
| 8 | -2.031271000 | 2.290424000  | -0.412556000 |
| 6 | -2.182551000 | 3.397985000  | 0.367663000  |
| 1 | -2.774228000 | 4.195617000  | -0.139217000 |
| 1 | -2.708967000 | 3.204124000  | 1.333747000  |
| 1 | -1.219495000 | 3.885626000  | 0.659272000  |

**A8R<sub>X=OMe</sub>**

| -----                   |              |              |              |
|-------------------------|--------------|--------------|--------------|
| Coordinates (Angstroms) |              |              |              |
|                         | X            | Y            | Z            |
| -----                   |              |              |              |
| 25                      | 0.740882000  | -1.013488000 | -0.023359000 |
| 1                       | -0.121991000 | 1.795324000  | -0.999743000 |
| 7                       | 0.238407000  | -0.205089000 | 1.689938000  |
| 1                       | -0.042969000 | 1.471464000  | 1.163040000  |
| 6                       | 0.712118000  | -0.589152000 | -1.703165000 |
| 8                       | 0.565497000  | -0.193104000 | -2.820725000 |
| 6                       | 2.456166000  | 0.715823000  | 2.081507000  |
| 6                       | -1.055636000 | -0.550947000 | 2.227129000  |
| 6                       | 1.199360000  | 0.135718000  | 2.720954000  |
| 1                       | 3.281593000  | 0.765475000  | 2.796088000  |
| 1                       | 2.244793000  | 1.720346000  | 1.707865000  |
| 1                       | 0.810004000  | 0.894616000  | 3.426206000  |
| 1                       | 1.462756000  | -0.745553000 | 3.335975000  |
| 1                       | -1.632372000 | 0.325173000  | 2.582894000  |
| 1                       | -0.968291000 | -1.222838000 | 3.101961000  |
| 6                       | -1.862539000 | -1.278179000 | 1.185226000  |
| 6                       | -3.200410000 | -1.629326000 | 1.374419000  |
| 1                       | -3.708685000 | -1.325525000 | 2.284562000  |
| 6                       | -1.827125000 | -2.337112000 | -0.871518000 |
| 1                       | -1.234416000 | -2.591701000 | -1.743292000 |
| 6                       | -3.853665000 | -2.369131000 | 0.398450000  |
| 1                       | -4.894487000 | -2.651519000 | 0.525042000  |
| 6                       | -3.147616000 | -2.739305000 | -0.746869000 |

|    |              |              |              |
|----|--------------|--------------|--------------|
| 1  | -3.613244000 | -3.320424000 | -1.535686000 |
| 7  | -1.195421000 | -1.610439000 | 0.065802000  |
| 16 | 2.920259000  | -0.335646000 | 0.655010000  |
| 6  | 3.851028000  | 0.854915000  | -0.431954000 |
| 6  | 4.378919000  | 0.002821000  | -1.589588000 |
| 6  | 5.015094000  | 1.460122000  | 0.356606000  |
| 1  | 3.561132000  | -0.498281000 | -2.117419000 |
| 1  | 4.902484000  | 0.647950000  | -2.304792000 |
| 1  | 5.084918000  | -0.757739000 | -1.239388000 |
| 1  | 4.663049000  | 2.102801000  | 1.170061000  |
| 1  | 5.659776000  | 0.683890000  | 0.782007000  |
| 1  | 5.624889000  | 2.079670000  | -0.312176000 |
| 6  | 2.939333000  | 1.960235000  | -0.969056000 |
| 1  | 3.537797000  | 2.655426000  | -1.570888000 |
| 1  | 2.152325000  | 1.547340000  | -1.603408000 |
| 1  | 2.465646000  | 2.534293000  | -0.167135000 |
| 6  | -0.727589000 | 2.454642000  | -0.361248000 |
| 8  | -0.219189000 | 2.431428000  | 0.954284000  |
| 6  | -2.162532000 | 1.952683000  | -0.422962000 |
| 6  | -2.592725000 | 1.177906000  | -1.503243000 |
| 6  | -3.079136000 | 2.276680000  | 0.581954000  |
| 6  | -3.916270000 | 0.746587000  | -1.588628000 |
| 1  | -1.876131000 | 0.892038000  | -2.270258000 |
| 6  | -4.402942000 | 1.846367000  | 0.501601000  |
| 1  | -2.744046000 | 2.859710000  | 1.435252000  |
| 6  | -4.827297000 | 1.083853000  | -0.587731000 |
| 1  | -4.232173000 | 0.134753000  | -2.429219000 |
| 1  | -5.104576000 | 2.103521000  | 1.290678000  |
| 1  | -5.856638000 | 0.741443000  | -0.648259000 |
| 6  | -0.616218000 | 3.879467000  | -0.892319000 |
| 1  | 0.431269000  | 4.199320000  | -0.888322000 |
| 1  | -0.996270000 | 3.944696000  | -1.917168000 |
| 1  | -1.195495000 | 4.567289000  | -0.265299000 |
| 8  | 1.244962000  | -2.948487000 | -0.082566000 |
| 6  | 2.267392000  | -3.372835000 | -0.885435000 |
| 1  | 3.241893000  | -2.866238000 | -0.695158000 |
| 1  | 2.467093000  | -4.459986000 | -0.760632000 |
| 1  | 2.066855000  | -3.220171000 | -1.972468000 |

A8S<sub>X=OMe</sub>

Coordinates (Angstroms)

|    | X           | Y           | Z            |
|----|-------------|-------------|--------------|
| 25 | 1.149175000 | 0.879599000 | -0.123238000 |

|    |              |              |              |
|----|--------------|--------------|--------------|
| 1  | -0.251823000 | -1.723324000 | -0.911340000 |
| 7  | 1.030781000  | -0.010061000 | 1.622854000  |
| 1  | 0.215902000  | -1.504818000 | 1.145476000  |
| 6  | 0.580018000  | 0.597681000  | -1.734377000 |
| 8  | 0.170971000  | 0.255956000  | -2.802911000 |
| 6  | -1.080903000 | 1.061282000  | 2.137710000  |
| 6  | 2.225055000  | -0.681383000 | 2.078192000  |
| 6  | 0.194644000  | 0.453494000  | 2.709901000  |
| 1  | -1.656231000 | 1.583303000  | 2.906866000  |
| 1  | -1.697525000 | 0.272598000  | 1.697635000  |
| 1  | -0.100563000 | -0.366133000 | 3.392582000  |
| 1  | 0.716498000  | 1.202643000  | 3.335852000  |
| 1  | 2.023195000  | -1.622096000 | 2.624933000  |
| 1  | 2.806867000  | -0.049909000 | 2.777097000  |
| 6  | 3.103539000  | -0.982167000 | 0.893822000  |
| 6  | 4.197669000  | -1.846637000 | 0.959065000  |
| 1  | 4.420577000  | -2.356193000 | 1.891588000  |
| 6  | 3.545277000  | -0.515193000 | -1.328983000 |
| 1  | 3.245047000  | 0.040721000  | -2.210708000 |
| 6  | 4.981797000  | -2.038068000 | -0.170863000 |
| 1  | 5.834520000  | -2.709882000 | -0.144324000 |
| 6  | 4.651235000  | -1.351499000 | -1.340103000 |
| 1  | 5.234027000  | -1.464664000 | -2.247917000 |
| 7  | 2.775650000  | -0.338563000 | -0.241896000 |
| 16 | -0.573729000 | 2.219162000  | 0.816584000  |
| 6  | -2.151828000 | 2.538476000  | -0.113771000 |
| 6  | -1.757049000 | 3.490004000  | -1.246288000 |
| 6  | -3.161501000 | 3.210895000  | 0.819134000  |
| 1  | -1.021581000 | 3.028150000  | -1.912843000 |
| 1  | -2.647800000 | 3.737368000  | -1.835514000 |
| 1  | -1.336348000 | 4.424372000  | -0.859580000 |
| 1  | -3.467335000 | 2.543159000  | 1.631195000  |
| 1  | -2.753430000 | 4.127102000  | 1.258573000  |
| 1  | -4.062396000 | 3.476145000  | 0.252383000  |
| 6  | -2.734067000 | 1.251605000  | -0.695657000 |
| 1  | -3.604891000 | 1.498634000  | -1.315690000 |
| 1  | -2.002269000 | 0.734088000  | -1.319340000 |
| 1  | -3.073307000 | 0.563451000  | 0.083473000  |
| 6  | -0.681717000 | -2.515530000 | -0.278587000 |
| 8  | -0.122705000 | -2.434373000 | 1.009809000  |
| 6  | -2.192114000 | -2.305619000 | -0.259788000 |
| 6  | -2.895595000 | -2.160482000 | -1.461913000 |
| 6  | -2.901266000 | -2.242976000 | 0.940593000  |
| 6  | -4.272958000 | -1.954194000 | -1.464128000 |

|   |              |              |              |
|---|--------------|--------------|--------------|
| 1 | -2.357076000 | -2.190699000 | -2.406567000 |
| 6 | -4.283157000 | -2.038296000 | 0.943610000  |
| 1 | -2.357999000 | -2.343711000 | 1.874912000  |
| 6 | -4.974332000 | -1.892289000 | -0.257801000 |
| 1 | -4.798425000 | -1.832062000 | -2.407377000 |
| 1 | -4.817375000 | -1.987138000 | 1.888711000  |
| 1 | -6.047870000 | -1.725728000 | -0.256726000 |
| 6 | -0.316127000 | -3.869876000 | -0.883873000 |
| 1 | 0.772473000  | -3.963710000 | -0.951882000 |
| 1 | -0.697450000 | -4.681381000 | -0.253250000 |
| 1 | -0.736698000 | -3.987250000 | -1.887785000 |
| 8 | 2.397887000  | 2.423972000  | -0.336986000 |
| 6 | 2.035701000  | 3.546565000  | -1.028808000 |
| 1 | 1.127988000  | 4.055007000  | -0.631243000 |
| 1 | 2.838180000  | 4.316514000  | -1.017810000 |
| 1 | 1.815254000  | 3.350022000  | -2.104302000 |

Al<sub>X=CHCHMe</sub>

Coordinates (Angstroms)

|    | X            | Y            | Z            |
|----|--------------|--------------|--------------|
| 25 | -0.166761000 | 0.044787000  | 0.107059000  |
| 7  | -0.419500000 | -1.736774000 | -0.563540000 |
| 6  | 0.123380000  | 0.963074000  | 1.547626000  |
| 8  | 0.288835000  | 1.526137000  | 2.589263000  |
| 6  | 1.962882000  | -2.179350000 | -0.733519000 |
| 6  | -1.755789000 | -2.241257000 | -0.728029000 |
| 6  | 0.569875000  | -2.556298000 | -1.226502000 |
| 1  | 2.744278000  | -2.578064000 | -1.386249000 |
| 1  | 2.108425000  | -2.562106000 | 0.280198000  |
| 1  | 0.421527000  | -3.633437000 | -1.025409000 |
| 1  | 0.524820000  | -2.443209000 | -2.328252000 |
| 1  | -1.903464000 | -3.240447000 | -0.273204000 |
| 1  | -2.032028000 | -2.363669000 | -1.794753000 |
| 6  | -2.729474000 | -1.278226000 | -0.109183000 |
| 6  | -4.099267000 | -1.534978000 | -0.025020000 |
| 1  | -4.490788000 | -2.471237000 | -0.411611000 |
| 6  | -3.008651000 | 0.781562000  | 0.902848000  |
| 1  | -2.530958000 | 1.689348000  | 1.255213000  |
| 6  | -4.937999000 | -0.589066000 | 0.547882000  |
| 1  | -6.005741000 | -0.769364000 | 0.626410000  |
| 6  | -4.376799000 | 0.597614000  | 1.022742000  |
| 1  | -4.986794000 | 1.370577000  | 1.477974000  |
| 7  | -2.187649000 | -0.134522000 | 0.353692000  |

|    |              |              |              |
|----|--------------|--------------|--------------|
| 16 | 2.033652000  | -0.354072000 | -0.680686000 |
| 6  | 3.488823000  | -0.012844000 | 0.424607000  |
| 6  | 3.579658000  | 1.514774000  | 0.479918000  |
| 6  | 4.754157000  | -0.598860000 | -0.206724000 |
| 1  | 2.667507000  | 1.948789000  | 0.900579000  |
| 1  | 4.425427000  | 1.806967000  | 1.113228000  |
| 1  | 3.736752000  | 1.944043000  | -0.515859000 |
| 1  | 4.707636000  | -1.691330000 | -0.266431000 |
| 1  | 4.917299000  | -0.203283000 | -1.214697000 |
| 1  | 5.624769000  | -0.337139000 | 0.407235000  |
| 6  | 3.281343000  | -0.579338000 | 1.829562000  |
| 1  | 4.114783000  | -0.265988000 | 2.470446000  |
| 1  | 2.350067000  | -0.214698000 | 2.269459000  |
| 1  | 3.261216000  | -1.673635000 | 1.832603000  |
| 6  | -0.394221000 | 1.584869000  | -1.138707000 |
| 1  | -0.517386000 | 1.219068000  | -2.185556000 |
| 6  | -0.495901000 | 2.933074000  | -1.087794000 |
| 1  | -0.388777000 | 3.434569000  | -0.116907000 |
| 6  | -0.749267000 | 3.875329000  | -2.245699000 |
| 1  | -1.683191000 | 4.442313000  | -2.120037000 |
| 1  | 0.051150000  | 4.621252000  | -2.356268000 |
| 1  | -0.823114000 | 3.325666000  | -3.192802000 |

A2<sub>X=CHCHMe</sub>

Coordinates (Angstroms)

|    | X            | Y            | Z            |
|----|--------------|--------------|--------------|
| 25 | -0.029344000 | -0.270516000 | -0.273951000 |
| 7  | -0.300281000 | 1.796377000  | 0.052911000  |
| 6  | 0.132438000  | -1.985288000 | -0.520927000 |
| 8  | 0.207269000  | -3.167923000 | -0.607055000 |
| 6  | 2.045379000  | 2.022813000  | 0.616796000  |
| 6  | -1.663334000 | 2.017545000  | 0.440288000  |
| 6  | 0.612437000  | 2.384140000  | 0.992209000  |
| 1  | 2.766744000  | 2.409461000  | 1.342073000  |
| 1  | 2.280628000  | 2.425123000  | -0.373609000 |
| 1  | 0.549584000  | 3.492127000  | 1.023602000  |
| 1  | 0.426680000  | 2.050682000  | 2.040413000  |
| 1  | -2.007635000 | 3.065230000  | 0.323476000  |
| 1  | -1.845114000 | 1.765734000  | 1.511538000  |
| 6  | -2.565669000 | 1.119030000  | -0.360400000 |
| 6  | -3.902786000 | 1.423562000  | -0.620694000 |
| 1  | -4.312702000 | 2.363450000  | -0.263316000 |
| 6  | -2.772287000 | -0.897614000 | -1.473413000 |

|    |              |              |              |
|----|--------------|--------------|--------------|
| 1  | -2.281376000 | -1.810626000 | -1.794362000 |
| 6  | -4.689687000 | 0.523268000  | -1.327986000 |
| 1  | -5.732541000 | 0.742893000  | -1.536170000 |
| 6  | -4.109016000 | -0.665479000 | -1.766521000 |
| 1  | -4.675613000 | -1.402388000 | -2.325620000 |
| 7  | -2.007561000 | -0.034544000 | -0.783740000 |
| 16 | 2.137378000  | 0.195485000  | 0.558601000  |
| 6  | 3.623976000  | -0.126732000 | -0.509947000 |
| 6  | 3.861401000  | -1.636276000 | -0.405594000 |
| 6  | 4.825504000  | 0.638699000  | 0.050314000  |
| 1  | 2.982900000  | -2.197590000 | -0.739946000 |
| 1  | 4.708672000  | -1.918880000 | -1.041482000 |
| 1  | 4.092006000  | -1.935504000 | 0.622410000  |
| 1  | 4.704545000  | 1.720528000  | -0.064728000 |
| 1  | 4.982898000  | 0.419278000  | 1.111661000  |
| 1  | 5.730867000  | 0.346857000  | -0.495481000 |
| 6  | 3.380643000  | 0.258452000  | -1.969191000 |
| 1  | 4.307149000  | 0.112110000  | -2.537976000 |
| 1  | 2.603960000  | -0.365860000 | -2.417649000 |
| 1  | 3.087573000  | 1.307784000  | -2.078086000 |
| 6  | -1.716470000 | -1.224863000 | 2.157223000  |
| 1  | -2.518902000 | -1.535064000 | 1.474652000  |
| 6  | -2.031599000 | -1.465259000 | 3.618221000  |
| 1  | -2.931371000 | -0.922488000 | 3.943824000  |
| 1  | -2.221926000 | -2.527848000 | 3.829730000  |
| 1  | -1.201408000 | -1.144452000 | 4.260513000  |
| 1  | 0.303857000  | -0.156472000 | -2.004814000 |
| 1  | 0.449154000  | 0.577663000  | -1.748855000 |
| 6  | -0.589111000 | -0.687038000 | 1.642118000  |
| 1  | 0.132744000  | -0.429793000 | 2.446631000  |

**A3<sub>X=CHCHMe</sub>**

| -----                   |              |              |              |
|-------------------------|--------------|--------------|--------------|
| Coordinates (Angstroms) |              |              |              |
|                         | X            | Y            | Z            |
| -----                   |              |              |              |
| 25                      | 1.158939000  | 0.631659000  | 0.283065000  |
| 1                       | 0.819356000  | -0.725275000 | 1.555042000  |
| 7                       | 0.145230000  | -0.193644000 | -1.277514000 |
| 6                       | 1.941322000  | 1.421592000  | 1.681145000  |
| 8                       | 2.448285000  | 1.999908000  | 2.551452000  |
| 6                       | 2.074920000  | -1.543346000 | -1.853628000 |
| 6                       | -0.886782000 | 0.721846000  | -1.706223000 |
| 6                       | 0.937248000  | -0.681472000 | -2.387196000 |
| 1                       | 2.741294000  | -1.877063000 | -2.651820000 |

|    |              |              |              |
|----|--------------|--------------|--------------|
| 1  | 1.677235000  | -2.412540000 | -1.322438000 |
| 1  | 0.337984000  | -1.305589000 | -3.073464000 |
| 1  | 1.353717000  | 0.140402000  | -2.999979000 |
| 1  | -1.680779000 | 0.235179000  | -2.297239000 |
| 1  | -0.487807000 | 1.539257000  | -2.338836000 |
| 6  | -1.500150000 | 1.349057000  | -0.488514000 |
| 6  | -2.778176000 | 1.904742000  | -0.477657000 |
| 1  | -3.375033000 | 1.881641000  | -1.383151000 |
| 6  | -1.207668000 | 1.881177000  | 1.753961000  |
| 1  | -0.548724000 | 1.852705000  | 2.614802000  |
| 6  | -3.270483000 | 2.456459000  | 0.695583000  |
| 1  | -4.266499000 | 2.886798000  | 0.725578000  |
| 6  | -2.473770000 | 2.433929000  | 1.840711000  |
| 1  | -2.822801000 | 2.841111000  | 2.782702000  |
| 7  | -0.723390000 | 1.358771000  | 0.613902000  |
| 16 | 3.017106000  | -0.504143000 | -0.677772000 |
| 6  | 3.989546000  | -1.711097000 | 0.356296000  |
| 6  | 4.912455000  | -0.841420000 | 1.213542000  |
| 6  | 4.808842000  | -2.588396000 | -0.593293000 |
| 1  | 4.339223000  | -0.179857000 | 1.870514000  |
| 1  | 5.528729000  | -1.490714000 | 1.845297000  |
| 1  | 5.580372000  | -0.230697000 | 0.597762000  |
| 1  | 4.170910000  | -3.242507000 | -1.195590000 |
| 1  | 5.427310000  | -1.985426000 | -1.265876000 |
| 1  | 5.472592000  | -3.226140000 | 0.001243000  |
| 6  | 3.097082000  | -2.571623000 | 1.248583000  |
| 1  | 3.718521000  | -3.334524000 | 1.731508000  |
| 1  | 2.625180000  | -1.976007000 | 2.033939000  |
| 1  | 2.315951000  | -3.089125000 | 0.683278000  |
| 1  | 0.651292000  | -1.108466000 | 0.907864000  |
| 1  | -1.461758000 | -1.495432000 | 1.455366000  |
| 1  | -0.573946000 | -1.541199000 | -0.672815000 |
| 6  | -1.855987000 | -2.215083000 | 0.717381000  |
| 8  | -0.917632000 | -2.431011000 | -0.302697000 |
| 6  | -3.173328000 | -1.639483000 | 0.209600000  |
| 6  | -4.088648000 | -1.093385000 | 1.116965000  |
| 6  | -3.501171000 | -1.653987000 | -1.146675000 |
| 6  | -5.303832000 | -0.572674000 | 0.678930000  |
| 1  | -3.841117000 | -1.063793000 | 2.176272000  |
| 6  | -4.715610000 | -1.128110000 | -1.591437000 |
| 1  | -2.790447000 | -2.068261000 | -1.855295000 |
| 6  | -5.621642000 | -0.586323000 | -0.680926000 |
| 1  | -6.000403000 | -0.147885000 | 1.396655000  |
| 1  | -4.951160000 | -1.140058000 | -2.652296000 |



|   |              |              |              |
|---|--------------|--------------|--------------|
| 1 | -6.565074000 | -0.173637000 | -1.026880000 |
| 6 | -2.084121000 | -3.545106000 | 1.432850000  |
| 1 | -1.139216000 | -3.914285000 | 1.844798000  |
| 1 | -2.802850000 | -3.437867000 | 2.251537000  |
| 1 | -2.471318000 | -4.288656000 | 0.727029000  |
| 6 | 1.667664000  | 2.209744000  | -0.815448000 |
| 1 | 2.079995000  | 1.984084000  | -1.810301000 |
| 6 | 1.471736000  | 3.513127000  | -0.564945000 |
| 1 | 1.060618000  | 3.818379000  | 0.402426000  |
| 6 | 1.733108000  | 4.645469000  | -1.524633000 |
| 1 | 2.152621000  | 4.278511000  | -2.468236000 |
| 1 | 0.810359000  | 5.194600000  | -1.754629000 |
| 1 | 2.435083000  | 5.376258000  | -1.101634000 |

**TSA3-4<sub>X</sub>=CHCHMe**

| Coordinates (Angstroms) |              |              |              |
|-------------------------|--------------|--------------|--------------|
|                         | X            | Y            | Z            |
| 25                      | -1.199190000 | 0.618365000  | -0.358582000 |
| 1                       | -0.746713000 | -0.562246000 | -1.539856000 |
| 7                       | -0.152425000 | -0.231135000 | 1.268254000  |
| 6                       | -2.018157000 | 1.386930000  | -1.689231000 |
| 8                       | -2.583583000 | 1.970975000  | -2.552385000 |
| 6                       | -2.148806000 | -1.472424000 | 1.874663000  |
| 6                       | 0.880449000  | 0.690992000  | 1.677834000  |
| 6                       | -0.984124000 | -0.631495000 | 2.382932000  |
| 1                       | -2.820269000 | -1.763302000 | 2.686592000  |
| 1                       | -1.766896000 | -2.371006000 | 1.381513000  |
| 1                       | -0.426858000 | -1.239786000 | 3.120932000  |
| 1                       | -1.376625000 | 0.242855000  | 2.934403000  |
| 1                       | 1.679455000  | 0.214841000  | 2.275529000  |
| 1                       | 0.470368000  | 1.507795000  | 2.300183000  |
| 6                       | 1.493225000  | 1.321423000  | 0.458863000  |
| 6                       | 2.785960000  | 1.845600000  | 0.455406000  |
| 1                       | 3.389658000  | 1.773982000  | 1.354737000  |
| 6                       | 1.196718000  | 1.926616000  | -1.750489000 |
| 1                       | 0.529766000  | 1.937404000  | -2.606505000 |
| 6                       | 3.284395000  | 2.433239000  | -0.699027000 |
| 1                       | 4.289155000  | 2.843996000  | -0.722563000 |
| 6                       | 2.471859000  | 2.468051000  | -1.831557000 |
| 1                       | 2.814737000  | 2.906155000  | -2.762689000 |
| 7                       | 0.702536000  | 1.369753000  | -0.632099000 |
| 16                      | -3.053978000 | -0.461531000 | 0.645927000  |
| 6                       | -3.998928000 | -1.730620000 | -0.332596000 |

|   |              |              |              |
|---|--------------|--------------|--------------|
| 6 | -4.924740000 | -0.912868000 | -1.238580000 |
| 6 | -4.823497000 | -2.593862000 | 0.625715000  |
| 1 | -4.349255000 | -0.254493000 | -1.897088000 |
| 1 | -5.515824000 | -1.590818000 | -1.865338000 |
| 1 | -5.617820000 | -0.298642000 | -0.653849000 |
| 1 | -4.187169000 | -3.227591000 | 1.251809000  |
| 1 | -5.452074000 | -1.979526000 | 1.279218000  |
| 1 | -5.478918000 | -3.253151000 | 0.044153000  |
| 6 | -3.082674000 | -2.607394000 | -1.185832000 |
| 1 | -3.684773000 | -3.381319000 | -1.677415000 |
| 1 | -2.583472000 | -2.021199000 | -1.961362000 |
| 1 | -2.316990000 | -3.113088000 | -0.588836000 |
| 1 | -0.791798000 | -0.998614000 | -0.872786000 |
| 1 | 1.407604000  | -1.327451000 | -1.247775000 |
| 1 | 0.485794000  | -1.406793000 | 0.811065000  |
| 6 | 1.810791000  | -2.126136000 | -0.599436000 |
| 8 | 0.960602000  | -2.357518000 | 0.475041000  |
| 6 | 3.202108000  | -1.649114000 | -0.180103000 |
| 6 | 4.095085000  | -1.147533000 | -1.135457000 |
| 6 | 3.606068000  | -1.683524000 | 1.155012000  |
| 6 | 5.358820000  | -0.692945000 | -0.766293000 |
| 1 | 3.789540000  | -1.093423000 | -2.178735000 |
| 6 | 4.870763000  | -1.226937000 | 1.532380000  |
| 1 | 2.906386000  | -2.057119000 | 1.896448000  |
| 6 | 5.752790000  | -0.729891000 | 0.573722000  |
| 1 | 6.035037000  | -0.300004000 | -1.521017000 |
| 1 | 5.164333000  | -1.255449000 | 2.578649000  |
| 1 | 6.735304000  | -0.369453000 | 0.865669000  |
| 6 | 1.912095000  | -3.396289000 | -1.450226000 |
| 1 | 0.914534000  | -3.683896000 | -1.799302000 |
| 1 | 2.556236000  | -3.252610000 | -2.324790000 |
| 1 | 2.319884000  | -4.219359000 | -0.851572000 |
| 6 | -1.641074000 | 2.261426000  | 0.770679000  |
| 1 | -2.327383000 | 2.108278000  | 1.630978000  |
| 6 | -1.234882000 | 3.547220000  | 0.697838000  |
| 1 | -0.551373000 | 3.844945000  | -0.108607000 |
| 6 | -1.601084000 | 4.676635000  | 1.636670000  |
| 1 | -2.295803000 | 4.333561000  | 2.413984000  |
| 1 | -0.718873000 | 5.096779000  | 2.141762000  |
| 1 | -2.081396000 | 5.514518000  | 1.110535000  |

A4<sub>x</sub>= CHCHMe

Coordinates (Angstroms)

|    | X            | Y            | Z            |
|----|--------------|--------------|--------------|
| 25 | 1.165923000  | 0.639944000  | 0.347147000  |
| 1  | 0.720374000  | -0.568055000 | 1.504093000  |
| 7  | 0.116093000  | -0.128183000 | -1.340635000 |
| 6  | 1.991846000  | 1.370878000  | 1.694398000  |
| 8  | 2.565816000  | 1.933583000  | 2.561802000  |
| 6  | 2.075249000  | -1.440303000 | -1.908877000 |
| 6  | -0.907256000 | 0.837728000  | -1.712612000 |
| 6  | 0.966846000  | -0.547896000 | -2.449932000 |
| 1  | 2.747404000  | -1.759264000 | -2.708780000 |
| 1  | 1.630774000  | -2.317453000 | -1.429021000 |
| 1  | 0.397446000  | -1.111318000 | -3.205297000 |
| 1  | 1.388938000  | 0.335864000  | -2.943060000 |
| 1  | -1.690404000 | 0.406383000  | -2.352301000 |
| 1  | -0.436599000 | 1.659308000  | -2.267706000 |
| 6  | -1.519930000 | 1.403801000  | -0.460665000 |
| 6  | -2.814024000 | 1.919264000  | -0.436679000 |
| 1  | -3.415996000 | 1.889334000  | -1.339160000 |
| 6  | -1.226420000 | 1.902775000  | 1.774086000  |
| 1  | -0.560641000 | 1.875507000  | 2.630439000  |
| 6  | -3.316036000 | 2.446973000  | 0.745623000  |
| 1  | -4.323084000 | 2.850196000  | 0.787803000  |
| 6  | -2.504544000 | 2.433519000  | 1.878129000  |
| 1  | -2.850492000 | 2.825809000  | 2.828261000  |
| 7  | -0.729825000 | 1.401341000  | 0.631475000  |
| 16 | 3.001050000  | -0.480920000 | -0.652974000 |
| 6  | 3.875698000  | -1.804603000 | 0.319872000  |
| 6  | 4.823165000  | -1.038375000 | 1.248355000  |
| 6  | 4.675235000  | -2.687327000 | -0.642155000 |
| 1  | 4.267820000  | -0.362063000 | 1.906060000  |
| 1  | 5.371348000  | -1.750012000 | 1.876576000  |
| 1  | 5.553964000  | -0.450676000 | 0.682630000  |
| 1  | 4.021175000  | -3.298124000 | -1.272740000 |
| 1  | 5.324136000  | -2.089007000 | -1.290554000 |
| 1  | 5.308389000  | -3.369491000 | -0.062558000 |
| 6  | 2.910437000  | -2.652162000 | 1.148189000  |
| 1  | 3.466557000  | -3.475480000 | 1.612863000  |
| 1  | 2.449913000  | -2.062523000 | 1.944627000  |
| 1  | 2.110490000  | -3.087273000 | 0.540987000  |
| 1  | 0.619837000  | -0.974426000 | 0.824220000  |
| 1  | -1.429938000 | -1.592141000 | 1.473296000  |
| 1  | -0.349062000 | -1.006196000 | -0.959537000 |
| 6  | -1.765421000 | -2.292847000 | 0.666300000  |
| 8  | -0.838883000 | -2.421823000 | -0.321958000 |

|   |              |              |              |
|---|--------------|--------------|--------------|
| 6 | -3.106112000 | -1.702931000 | 0.190897000  |
| 6 | -4.047423000 | -1.203948000 | 1.100566000  |
| 6 | -3.409596000 | -1.645387000 | -1.170538000 |
| 6 | -5.257794000 | -0.668233000 | 0.663703000  |
| 1 | -3.822411000 | -1.221966000 | 2.165892000  |
| 6 | -4.618939000 | -1.109000000 | -1.617573000 |
| 1 | -2.663330000 | -2.012614000 | -1.869792000 |
| 6 | -5.549815000 | -0.618324000 | -0.701743000 |
| 1 | -5.970722000 | -0.279266000 | 1.386487000  |
| 1 | -4.831684000 | -1.066084000 | -2.683145000 |
| 1 | -6.488567000 | -0.193551000 | -1.046881000 |
| 6 | -2.040646000 | -3.637728000 | 1.376168000  |
| 1 | -1.102153000 | -4.025618000 | 1.789146000  |
| 1 | -2.768041000 | -3.548430000 | 2.193962000  |
| 1 | -2.422054000 | -4.367975000 | 0.650491000  |
| 6 | 1.650052000  | 2.296113000  | -0.743189000 |
| 1 | 2.172568000  | 2.132336000  | -1.710559000 |
| 6 | 1.417241000  | 3.609130000  | -0.532779000 |
| 1 | 0.910912000  | 3.915526000  | 0.392223000  |
| 6 | 1.765722000  | 4.759127000  | -1.452518000 |
| 1 | 2.262999000  | 4.399512000  | -2.362305000 |
| 1 | 0.873466000  | 5.322439000  | -1.762511000 |
| 1 | 2.437250000  | 5.485273000  | -0.972054000 |

**TSA4-5<sub>X</sub>=CHCHMe**

| Coordinates (Angstroms) |              |              |              |
|-------------------------|--------------|--------------|--------------|
|                         | X            | Y            | Z            |
| 25                      | 1.085627000  | 0.635861000  | 0.366585000  |
| 1                       | 0.597109000  | -0.833284000 | 1.227406000  |
| 7                       | 0.088853000  | -0.042027000 | -1.405938000 |
| 6                       | 1.822192000  | 1.238023000  | 1.815158000  |
| 8                       | 2.320603000  | 1.712531000  | 2.783453000  |
| 6                       | 2.074382000  | -1.332157000 | -1.959898000 |
| 6                       | -0.917836000 | 0.950338000  | -1.758195000 |
| 6                       | 0.968485000  | -0.436840000 | -2.503797000 |
| 1                       | 2.760249000  | -1.623679000 | -2.758799000 |
| 1                       | 1.638366000  | -2.229735000 | -1.510930000 |
| 1                       | 0.421584000  | -0.979183000 | -3.289709000 |
| 1                       | 1.394893000  | 0.464811000  | -2.957477000 |
| 1                       | -1.679441000 | 0.562915000  | -2.449700000 |
| 1                       | -0.414403000 | 1.793813000  | -2.246445000 |
| 6                       | -1.569265000 | 1.446812000  | -0.495353000 |
| 6                       | -2.862015000 | 1.964293000  | -0.489602000 |

|    |              |              |              |
|----|--------------|--------------|--------------|
| 1  | -3.429470000 | 1.989161000  | -1.414467000 |
| 6  | -1.357843000 | 1.809889000  | 1.772505000  |
| 1  | -0.728959000 | 1.724864000  | 2.652151000  |
| 6  | -3.406091000 | 2.428230000  | 0.701331000  |
| 1  | -4.412307000 | 2.834691000  | 0.729392000  |
| 6  | -2.636518000 | 2.343224000  | 1.859208000  |
| 1  | -3.015165000 | 2.681516000  | 2.817756000  |
| 7  | -0.816750000 | 1.374530000  | 0.622371000  |
| 16 | 2.966466000  | -0.393260000 | -0.666253000 |
| 6  | 3.909289000  | -1.717538000 | 0.239009000  |
| 6  | 4.849977000  | -0.943206000 | 1.168521000  |
| 6  | 4.718135000  | -2.545460000 | -0.762869000 |
| 1  | 4.286662000  | -0.288235000 | 1.841266000  |
| 1  | 5.422823000  | -1.649542000 | 1.780647000  |
| 1  | 5.558896000  | -0.330334000 | 0.601558000  |
| 1  | 4.071863000  | -3.159753000 | -1.398279000 |
| 1  | 5.337385000  | -1.910680000 | -1.405713000 |
| 1  | 5.382246000  | -3.223900000 | -0.214083000 |
| 6  | 2.992602000  | -2.621895000 | 1.060604000  |
| 1  | 3.591110000  | -3.422294000 | 1.513068000  |
| 1  | 2.501962000  | -2.061371000 | 1.860434000  |
| 1  | 2.210873000  | -3.084141000 | 0.449968000  |
| 1  | 0.177840000  | -1.408656000 | 0.654044000  |
| 1  | -1.529458000 | -1.788944000 | 1.795339000  |
| 1  | -0.378084000 | -0.891953000 | -1.048282000 |
| 6  | -1.716125000 | -2.372416000 | 0.864624000  |
| 8  | -0.611563000 | -2.320328000 | 0.040515000  |
| 6  | -2.971615000 | -1.763990000 | 0.236543000  |
| 6  | -4.002983000 | -1.264107000 | 1.039316000  |
| 6  | -3.133343000 | -1.727373000 | -1.150990000 |
| 6  | -5.169372000 | -0.750138000 | 0.474667000  |
| 1  | -3.884837000 | -1.268445000 | 2.121447000  |
| 6  | -4.296759000 | -1.211654000 | -1.723578000 |
| 1  | -2.327735000 | -2.097564000 | -1.779440000 |
| 6  | -5.321786000 | -0.723112000 | -0.912583000 |
| 1  | -5.954031000 | -0.358880000 | 1.116961000  |
| 1  | -4.402038000 | -1.186079000 | -2.805275000 |
| 1  | -6.225319000 | -0.314719000 | -1.356728000 |
| 6  | -2.016000000 | -3.816330000 | 1.302108000  |
| 1  | -1.133906000 | -4.237385000 | 1.796649000  |
| 1  | -2.862748000 | -3.869323000 | 1.997739000  |
| 1  | -2.247655000 | -4.434027000 | 0.425495000  |
| 6  | 1.589385000  | 2.352647000  | -0.633135000 |
| 1  | 2.120775000  | 2.236147000  | -1.604991000 |

|   |             |             |              |
|---|-------------|-------------|--------------|
| 6 | 1.356535000 | 3.659036000 | -0.375473000 |
| 1 | 0.842316000 | 3.931284000 | 0.556260000  |
| 6 | 1.713677000 | 4.845168000 | -1.246236000 |
| 1 | 2.220764000 | 4.521434000 | -2.164299000 |
| 1 | 0.824513000 | 5.420290000 | -1.544217000 |
| 1 | 2.379506000 | 5.553002000 | -0.731411000 |

**A5<sub>X=</sub> CHCHMe**

| Coordinates (Angstroms) |              |              |              |
|-------------------------|--------------|--------------|--------------|
|                         | X            | Y            | Z            |
| 25                      | -0.869715000 | 0.709395000  | -0.372913000 |
| 1                       | -0.188957000 | -0.743124000 | -0.797333000 |
| 7                       | -0.326765000 | 0.335278000  | 1.649292000  |
| 1                       | 0.221915000  | -0.525570000 | 1.643213000  |
| 6                       | -1.246017000 | 1.042247000  | -2.064216000 |
| 8                       | -1.492929000 | 1.300564000  | -3.173378000 |
| 6                       | -2.409936000 | -0.922699000 | 1.912811000  |
| 6                       | 0.555346000  | 1.420340000  | 2.082512000  |
| 6                       | -1.482833000 | 0.116120000  | 2.529518000  |
| 1                       | -3.290242000 | -1.063690000 | 2.543002000  |
| 1                       | -1.894017000 | -1.880617000 | 1.801567000  |
| 1                       | -1.170771000 | -0.230700000 | 3.523404000  |
| 1                       | -2.002294000 | 1.071844000  | 2.649940000  |
| 1                       | 1.158177000  | 1.145388000  | 2.956491000  |
| 1                       | -0.064950000 | 2.280261000  | 2.353805000  |
| 6                       | 1.445680000  | 1.823726000  | 0.938080000  |
| 6                       | 2.649912000  | 2.490217000  | 1.144167000  |
| 1                       | 2.977727000  | 2.698949000  | 2.157175000  |
| 6                       | 1.749651000  | 1.881732000  | -1.357032000 |
| 1                       | 1.358512000  | 1.610309000  | -2.330792000 |
| 6                       | 3.413490000  | 2.866535000  | 0.047043000  |
| 1                       | 4.356501000  | 3.385762000  | 0.185356000  |
| 6                       | 2.960121000  | 2.544904000  | -1.229620000 |
| 1                       | 3.529779000  | 2.799085000  | -2.116184000 |
| 7                       | 0.996438000  | 1.541392000  | -0.299736000 |
| 16                      | -2.930938000 | -0.318032000 | 0.265504000  |
| 6                       | -3.535498000 | -1.839905000 | -0.621408000 |
| 6                       | -4.067327000 | -1.322285000 | -1.960587000 |
| 6                       | -4.670338000 | -2.443504000 | 0.210256000  |
| 1                       | -3.264600000 | -0.896181000 | -2.569487000 |
| 1                       | -4.500950000 | -2.161111000 | -2.515919000 |
| 1                       | -4.846678000 | -0.564806000 | -1.826956000 |
| 1                       | -4.306811000 | -2.841483000 | 1.162973000  |

|   |              |              |              |
|---|--------------|--------------|--------------|
| 1 | -5.455706000 | -1.708553000 | 0.414176000  |
| 1 | -5.117135000 | -3.274621000 | -0.347008000 |
| 6 | -2.434549000 | -2.869749000 | -0.857865000 |
| 1 | -2.872826000 | -3.734640000 | -1.369755000 |
| 1 | -1.639324000 | -2.461847000 | -1.486576000 |
| 1 | -1.988396000 | -3.224482000 | 0.075144000  |
| 1 | 1.111387000  | -3.727552000 | -0.595174000 |
| 1 | 0.103068000  | -1.845408000 | 0.215891000  |
| 6 | 1.480227000  | -3.225190000 | 0.311149000  |
| 8 | 0.420355000  | -2.484243000 | 0.898616000  |
| 6 | 2.638003000  | -2.324734000 | -0.088352000 |
| 6 | 3.234984000  | -2.448861000 | -1.344130000 |
| 6 | 3.143241000  | -1.378556000 | 0.809935000  |
| 6 | 4.322628000  | -1.648683000 | -1.698740000 |
| 1 | 2.842857000  | -3.173655000 | -2.054082000 |
| 6 | 4.229920000  | -0.580986000 | 0.461145000  |
| 1 | 2.677048000  | -1.263046000 | 1.785407000  |
| 6 | 4.823975000  | -0.713411000 | -0.795285000 |
| 1 | 4.774227000  | -1.754264000 | -2.681128000 |
| 1 | 4.610896000  | 0.150271000  | 1.167767000  |
| 1 | 5.666966000  | -0.085257000 | -1.068941000 |
| 6 | 1.913344000  | -4.285024000 | 1.314515000  |
| 1 | 1.070204000  | -4.935957000 | 1.566496000  |
| 1 | 2.716390000  | -4.900598000 | 0.897638000  |
| 1 | 2.279466000  | -3.814909000 | 2.233793000  |
| 6 | -1.717156000 | 2.516838000  | 0.138609000  |
| 1 | -2.799792000 | 2.494830000  | 0.349033000  |
| 6 | -1.202506000 | 3.757931000  | 0.206962000  |
| 1 | -0.137297000 | 3.916397000  | 0.003461000  |
| 6 | -1.951526000 | 5.020352000  | 0.564093000  |
| 1 | -3.010875000 | 4.814604000  | 0.758093000  |
| 1 | -1.532954000 | 5.499579000  | 1.460042000  |
| 1 | -1.896806000 | 5.767043000  | -0.239938000 |

**TSA2-6<sub>x=CHCHMe</sub>**

| -----                   |              |              |              |
|-------------------------|--------------|--------------|--------------|
| Coordinates (Angstroms) |              |              |              |
|                         | X            | Y            | Z            |
| -----                   |              |              |              |
| 25                      | 0.031867000  | 0.321604000  | -0.217004000 |
| 7                       | 0.328293000  | -1.806846000 | -0.332566000 |
| 6                       | -0.212588000 | 2.033381000  | -0.368189000 |
| 8                       | -0.361740000 | 3.211401000  | -0.433494000 |
| 6                       | -2.027762000 | -2.107926000 | 0.187077000  |

|    |              |              |              |
|----|--------------|--------------|--------------|
| 6  | 1.707775000  | -2.096538000 | -0.062072000 |
| 6  | -0.600594000 | -2.569567000 | 0.457398000  |
| 1  | -2.741561000 | -2.655317000 | 0.807710000  |
| 1  | -2.275477000 | -2.270181000 | -0.866404000 |
| 1  | -0.554701000 | -3.653008000 | 0.238094000  |
| 1  | -0.384431000 | -2.461364000 | 1.540152000  |
| 1  | 2.047296000  | -3.066310000 | -0.469864000 |
| 1  | 1.893737000  | -2.145834000 | 1.030820000  |
| 6  | 2.592786000  | -1.001916000 | -0.599386000 |
| 6  | 3.941830000  | -1.213849000 | -0.883440000 |
| 1  | 4.361299000  | -2.208258000 | -0.764780000 |
| 6  | 2.784817000  | 1.232712000  | -1.152683000 |
| 1  | 2.283947000  | 2.189360000  | -1.253959000 |
| 6  | 4.731034000  | -0.149592000 | -1.302083000 |
| 1  | 5.785101000  | -0.293749000 | -1.518748000 |
| 6  | 4.136486000  | 1.103087000  | -1.439556000 |
| 1  | 4.703252000  | 1.968680000  | -1.765312000 |
| 7  | 2.018078000  | 0.211342000  | -0.734010000 |
| 16 | -2.123867000 | -0.315037000 | 0.550406000  |
| 6  | -3.615071000 | 0.219466000  | -0.425192000 |
| 6  | -3.850831000 | 1.674774000  | -0.008417000 |
| 6  | -4.818113000 | -0.641845000 | -0.032193000 |
| 1  | -2.981362000 | 2.298158000  | -0.238997000 |
| 1  | -4.712502000 | 2.074899000  | -0.555439000 |
| 1  | -4.060975000 | 1.757094000  | 1.063427000  |
| 1  | -4.700300000 | -1.679474000 | -0.360245000 |
| 1  | -4.978112000 | -0.636611000 | 1.051261000  |
| 1  | -5.720882000 | -0.243708000 | -0.510891000 |
| 6  | -3.373489000 | 0.145688000  | -1.932293000 |
| 1  | -4.282542000 | 0.465214000  | -2.456850000 |
| 1  | -2.550340000 | 0.799569000  | -2.231557000 |
| 1  | -3.139561000 | -0.871005000 | -2.263958000 |
| 6  | 0.548359000  | 0.559155000  | 1.754746000  |
| 1  | -0.285061000 | 0.754084000  | 2.463960000  |
| 6  | 1.729358000  | 0.543170000  | 2.415680000  |
| 1  | 2.658071000  | 0.372018000  | 1.855489000  |
| 6  | 1.945934000  | 0.735069000  | 3.902388000  |
| 1  | 2.429505000  | -0.137487000 | 4.365937000  |
| 1  | 2.594905000  | 1.596063000  | 4.119901000  |
| 1  | 0.992890000  | 0.898628000  | 4.421602000  |
| 1  | -0.358215000 | -0.180289000 | -1.856351000 |
| 1  | -0.089045000 | -0.984977000 | -1.363098000 |

---

**A6<sub>X=CHCHMe</sub>**



| -----                   |              |              |              |
|-------------------------|--------------|--------------|--------------|
| Coordinates (Angstroms) |              |              |              |
|                         | X            | Y            | Z            |
| -----                   |              |              |              |
| 25                      | 0.027668000  | 0.361903000  | 0.064885000  |
| 1                       | -0.394022000 | 1.158751000  | -1.298903000 |
| 7                       | 0.323877000  | -1.351961000 | -1.173389000 |
| 1                       | 0.117249000  | -0.986999000 | -2.099258000 |
| 6                       | -0.185930000 | 1.872677000  | 0.960857000  |
| 8                       | -0.304922000 | 2.884447000  | 1.521634000  |
| 6                       | -2.031509000 | -1.906824000 | -0.859797000 |
| 6                       | 1.736259000  | -1.710272000 | -1.080422000 |
| 6                       | -0.602570000 | -2.436558000 | -0.845375000 |
| 1                       | -2.732434000 | -2.699815000 | -0.589329000 |
| 1                       | -2.286694000 | -1.540362000 | -1.858576000 |
| 1                       | -0.521521000 | -3.277510000 | -1.550724000 |
| 1                       | -0.338105000 | -2.795496000 | 0.154414000  |
| 1                       | 2.067264000  | -2.370388000 | -1.894230000 |
| 1                       | 1.874227000  | -2.230292000 | -0.125460000 |
| 6                       | 2.570987000  | -0.456119000 | -1.034263000 |
| 6                       | 3.889111000  | -0.422681000 | -1.478196000 |
| 1                       | 4.330411000  | -1.309246000 | -1.921390000 |
| 6                       | 2.683517000  | 1.751930000  | -0.360034000 |
| 1                       | 2.159513000  | 2.590371000  | 0.082840000  |
| 6                       | 4.620750000  | 0.751291000  | -1.339491000 |
| 1                       | 5.651639000  | 0.800529000  | -1.675301000 |
| 6                       | 4.006411000  | 1.859711000  | -0.766801000 |
| 1                       | 4.533535000  | 2.797688000  | -0.637409000 |
| 7                       | 1.978827000  | 0.621102000  | -0.488141000 |
| 16                      | -2.165969000 | -0.526686000 | 0.333716000  |
| 6                       | -3.598719000 | 0.466716000  | -0.318505000 |
| 6                       | -3.716138000 | 1.643400000  | 0.656515000  |
| 6                       | -4.853896000 | -0.409489000 | -0.252620000 |
| 1                       | -2.845889000 | 2.300600000  | 0.593200000  |
| 1                       | -4.605765000 | 2.229256000  | 0.400302000  |
| 1                       | -3.820979000 | 1.301148000  | 1.690933000  |
| 1                       | -4.789502000 | -1.262089000 | -0.936835000 |
| 1                       | -5.025059000 | -0.787263000 | 0.759826000  |
| 1                       | -5.725058000 | 0.184801000  | -0.551035000 |
| 6                       | -3.365822000 | 0.983003000  | -1.737026000 |
| 1                       | -4.176863000 | 1.672029000  | -1.999506000 |
| 1                       | -2.408289000 | 1.504918000  | -1.806897000 |
| 1                       | -3.376785000 | 0.176138000  | -2.477393000 |
| 6                       | 0.588876000  | -0.706158000 | 1.736727000  |
| 1                       | -0.230139000 | -1.052211000 | 2.389371000  |
| 6                       | 1.798077000  | -0.997677000 | 2.246545000  |

|   |             |              |             |
|---|-------------|--------------|-------------|
| 1 | 2.706146000 | -0.677230000 | 1.720487000 |
| 6 | 2.073066000 | -1.715546000 | 3.546947000 |
| 1 | 2.652247000 | -2.636446000 | 3.392065000 |
| 1 | 2.656311000 | -1.089379000 | 4.235129000 |
| 1 | 1.137985000 | -1.986096000 | 4.049376000 |

**A7R<sub>X=CHCHMe</sub>**

Coordinates (Angstroms)

|    | X            | Y            | Z            |
|----|--------------|--------------|--------------|
| 25 | 0.854044000  | 0.592413000  | 0.447943000  |
| 1  | 0.140293000  | -0.969479000 | 0.686530000  |
| 7  | 0.483628000  | 0.337788000  | -1.684523000 |
| 1  | 0.015439000  | -0.561348000 | -1.781099000 |
| 6  | 1.121025000  | 0.910516000  | 2.124463000  |
| 8  | 1.312064000  | 1.210804000  | 3.262666000  |
| 6  | 2.680104000  | -0.710489000 | -1.887924000 |
| 6  | -0.447682000 | 1.380682000  | -2.103358000 |
| 6  | 1.712527000  | 0.302780000  | -2.479653000 |
| 1  | 3.610462000  | -0.725671000 | -2.461169000 |
| 1  | 2.232687000  | -1.708106000 | -1.919191000 |
| 1  | 1.514101000  | 0.039542000  | -3.529462000 |
| 1  | 2.153558000  | 1.304563000  | -2.461100000 |
| 1  | -0.976229000 | 1.129378000  | -3.032993000 |
| 1  | 0.130074000  | 2.293556000  | -2.283854000 |
| 6  | -1.430746000 | 1.672272000  | -1.002000000 |
| 6  | -2.658097000 | 2.276609000  | -1.268264000 |
| 1  | -2.934357000 | 2.486090000  | -2.297408000 |
| 6  | -1.864154000 | 1.673045000  | 1.260388000  |
| 1  | -1.516682000 | 1.402963000  | 2.251624000  |
| 6  | -3.501994000 | 2.606684000  | -0.215398000 |
| 1  | -4.459082000 | 3.085403000  | -0.398174000 |
| 6  | -3.093671000 | 2.289615000  | 1.078261000  |
| 1  | -3.716286000 | 2.508183000  | 1.939399000  |
| 7  | -1.025324000 | 1.377812000  | 0.250418000  |
| 16 | 3.006059000  | -0.247417000 | -0.148226000 |
| 6  | 3.669945000  | -1.829497000 | 0.573945000  |
| 6  | 3.921649000  | -1.499233000 | 2.048264000  |
| 6  | 4.984250000  | -2.183804000 | -0.126293000 |
| 1  | 2.986667000  | -1.244427000 | 2.556983000  |
| 1  | 4.359964000  | -2.371696000 | 2.546761000  |
| 1  | 4.616741000  | -0.659744000 | 2.161617000  |
| 1  | 4.827256000  | -2.414118000 | -1.185446000 |
| 1  | 5.710636000  | -1.367328000 | -0.055511000 |

|   |              |              |              |
|---|--------------|--------------|--------------|
| 1 | 5.423509000  | -3.072434000 | 0.343589000  |
| 6 | 2.680715000  | -2.988256000 | 0.467373000  |
| 1 | 3.092772000  | -3.860672000 | 0.989592000  |
| 1 | 1.722492000  | -2.725981000 | 0.921293000  |
| 1 | 2.501083000  | -3.284292000 | -0.570874000 |
| 6 | -1.689357000 | -2.568035000 | -1.150821000 |
| 8 | -1.474234000 | -1.983761000 | -2.208509000 |
| 6 | -2.808008000 | -2.125166000 | -0.261322000 |
| 6 | -3.022651000 | -2.705035000 | 0.994920000  |
| 6 | -3.673651000 | -1.120551000 | -0.709822000 |
| 6 | -4.087063000 | -2.286384000 | 1.788988000  |
| 1 | -2.356232000 | -3.476693000 | 1.365370000  |
| 6 | -4.742457000 | -0.709436000 | 0.079820000  |
| 1 | -3.499905000 | -0.668775000 | -1.680997000 |
| 6 | -4.950414000 | -1.291442000 | 1.331016000  |
| 1 | -4.241627000 | -2.737200000 | 2.764536000  |
| 1 | -5.412094000 | 0.067137000  | -0.276728000 |
| 1 | -5.782421000 | -0.967464000 | 1.949658000  |
| 6 | -0.875392000 | -3.772527000 | -0.762058000 |
| 1 | -0.096319000 | -3.936489000 | -1.507622000 |
| 1 | -0.414626000 | -3.633573000 | 0.219485000  |
| 1 | -1.520632000 | -4.656892000 | -0.707496000 |
| 6 | 1.649517000  | 2.483959000  | 0.041633000  |
| 1 | 2.735578000  | 2.556283000  | -0.192602000 |
| 6 | 1.102330000  | 3.720890000  | 0.097706000  |
| 1 | 0.032749000  | 3.822060000  | 0.328473000  |
| 6 | 1.794051000  | 5.047932000  | -0.137100000 |
| 1 | 1.360465000  | 5.596576000  | -0.986672000 |
| 1 | 1.714389000  | 5.717725000  | 0.731877000  |
| 1 | 2.862077000  | 4.904967000  | -0.346441000 |

A7S<sub>X</sub>=CHCHMe

Coordinates (Angstroms)

|    | X            | Y            | Z            |
|----|--------------|--------------|--------------|
| 25 | -0.976475000 | 0.710260000  | 0.462782000  |
| 1  | 0.331278000  | -0.272923000 | 1.036372000  |
| 7  | -0.571397000 | -0.186651000 | -1.476745000 |
| 1  | 0.188229000  | -0.843272000 | -1.320360000 |
| 6  | -1.413431000 | 1.419158000  | 1.978333000  |
| 8  | -1.795386000 | 1.927949000  | 2.987671000  |
| 6  | 1.011551000  | 1.614224000  | -1.923797000 |
| 6  | -1.750727000 | -0.955210000 | -1.863860000 |
| 6  | -0.137673000 | 0.786234000  | -2.479146000 |

|    |              |              |              |
|----|--------------|--------------|--------------|
| 1  | 1.325605000  | 2.362263000  | -2.655975000 |
| 1  | 1.861972000  | 0.961622000  | -1.703192000 |
| 1  | 0.191971000  | 0.297876000  | -3.408803000 |
| 1  | -0.991750000 | 1.428370000  | -2.717912000 |
| 1  | -1.533799000 | -1.704617000 | -2.635816000 |
| 1  | -2.488639000 | -0.250846000 | -2.262526000 |
| 6  | -2.348087000 | -1.609789000 | -0.648101000 |
| 6  | -3.078149000 | -2.793260000 | -0.734267000 |
| 1  | -3.180020000 | -3.287134000 | -1.695775000 |
| 6  | -2.731456000 | -1.480876000 | 1.621882000  |
| 1  | -2.559177000 | -0.934062000 | 2.542711000  |
| 6  | -3.659648000 | -3.325242000 | 0.410697000  |
| 1  | -4.230421000 | -4.247710000 | 0.366284000  |
| 6  | -3.482792000 | -2.647982000 | 1.615585000  |
| 1  | -3.911075000 | -3.017023000 | 2.541514000  |
| 7  | -2.165673000 | -0.957539000 | 0.519405000  |
| 16 | 0.464324000  | 2.422814000  | -0.375095000 |
| 6  | 2.083301000  | 2.810851000  | 0.457805000  |
| 6  | 1.687697000  | 3.569472000  | 1.728552000  |
| 6  | 2.917498000  | 3.711188000  | -0.458004000 |
| 1  | 1.061239000  | 2.949043000  | 2.377659000  |
| 1  | 2.591798000  | 3.844424000  | 2.284401000  |
| 1  | 1.140313000  | 4.489693000  | 1.495336000  |
| 1  | 3.242959000  | 3.181939000  | -1.359871000 |
| 1  | 2.359438000  | 4.603080000  | -0.762892000 |
| 1  | 3.818568000  | 4.038965000  | 0.074735000  |
| 6  | 2.870397000  | 1.554795000  | 0.826615000  |
| 1  | 3.808528000  | 1.849621000  | 1.313679000  |
| 1  | 2.301647000  | 0.921718000  | 1.509244000  |
| 1  | 3.129410000  | 0.956920000  | -0.051794000 |
| 6  | 1.235588000  | -2.916856000 | -0.144552000 |
| 8  | 0.642484000  | -2.952264000 | -1.217263000 |
| 6  | 2.606314000  | -2.314436000 | -0.071980000 |
| 6  | 3.313750000  | -2.222481000 | 1.131833000  |
| 6  | 3.191853000  | -1.831467000 | -1.249174000 |
| 6  | 4.587759000  | -1.659643000 | 1.156698000  |
| 1  | 2.872479000  | -2.580492000 | 2.056147000  |
| 6  | 4.464688000  | -1.271085000 | -1.224918000 |
| 1  | 2.638719000  | -1.899799000 | -2.180609000 |
| 6  | 5.165469000  | -1.185531000 | -0.020568000 |
| 1  | 5.125198000  | -1.584422000 | 2.097065000  |
| 1  | 4.909340000  | -0.895150000 | -2.141560000 |
| 1  | 6.156271000  | -0.741244000 | 0.001314000  |
| 6  | 0.615443000  | -3.503200000 | 1.093992000  |

|   |              |              |              |
|---|--------------|--------------|--------------|
| 1 | -0.403414000 | -3.821626000 | 0.866744000  |
| 1 | 1.201173000  | -4.365516000 | 1.433488000  |
| 1 | 0.594641000  | -2.769244000 | 1.903253000  |
| 6 | -2.521253000 | 1.812218000  | -0.400408000 |
| 1 | -2.302473000 | 2.877859000  | -0.635492000 |
| 6 | -3.815670000 | 1.532477000  | -0.679520000 |
| 1 | -4.198282000 | 0.519409000  | -0.493665000 |
| 6 | -4.857381000 | 2.476920000  | -1.243583000 |
| 1 | -4.429377000 | 3.471532000  | -1.423757000 |
| 1 | -5.273776000 | 2.116340000  | -2.196221000 |
| 1 | -5.713418000 | 2.603863000  | -0.564337000 |

**TSA7-8R<sub>X=CHCHMe</sub>**

Coordinates (Angstroms)

|    | X            | Y            | Z            |
|----|--------------|--------------|--------------|
| 25 | 0.657156000  | 0.503468000  | 0.369217000  |
| 1  | 0.145173000  | -1.168042000 | 0.109931000  |
| 7  | 0.451514000  | 0.574913000  | -1.757206000 |
| 1  | 0.057902000  | -0.348219000 | -1.966571000 |
| 6  | 0.734334000  | 0.357882000  | 2.091900000  |
| 8  | 0.775828000  | 0.283808000  | 3.281716000  |
| 6  | 2.738203000  | -0.252626000 | -1.952375000 |
| 6  | -0.562480000 | 1.567945000  | -2.092235000 |
| 6  | 1.703282000  | 0.722064000  | -2.500582000 |
| 1  | 3.684854000  | -0.140434000 | -2.487194000 |
| 1  | 2.383760000  | -1.281860000 | -2.066433000 |
| 1  | 1.563801000  | 0.535148000  | -3.575775000 |
| 1  | 2.056106000  | 1.752777000  | -2.380506000 |
| 1  | -0.998268000 | 1.412894000  | -3.089320000 |
| 1  | -0.087865000 | 2.555642000  | -2.081309000 |
| 6  | -1.641306000 | 1.562064000  | -1.042310000 |
| 6  | -2.917161000 | 2.056752000  | -1.304105000 |
| 1  | -3.161503000 | 2.394924000  | -2.306698000 |
| 6  | -2.195557000 | 1.156457000  | 1.158782000  |
| 1  | -1.873227000 | 0.774047000  | 2.120856000  |
| 6  | -3.850729000 | 2.121279000  | -0.276635000 |
| 1  | -4.847654000 | 2.512303000  | -0.455251000 |
| 6  | -3.476840000 | 1.659870000  | 0.983244000  |
| 1  | -4.168203000 | 1.672911000  | 1.819036000  |
| 7  | -1.277355000 | 1.113598000  | 0.177205000  |
| 16 | 2.951879000  | 0.128556000  | -0.179026000 |
| 6  | 3.881327000  | -1.337658000 | 0.479765000  |
| 6  | 4.204376000  | -0.958449000 | 1.929054000  |

|   |              |              |              |
|---|--------------|--------------|--------------|
| 6 | 5.172774000  | -1.536245000 | -0.316466000 |
| 1 | 3.289279000  | -0.773971000 | 2.500796000  |
| 1 | 4.747540000  | -1.781191000 | 2.408514000  |
| 1 | 4.830672000  | -0.060946000 | 1.981321000  |
| 1 | 4.970249000  | -1.840290000 | -1.348688000 |
| 1 | 5.776094000  | -0.622161000 | -0.337811000 |
| 1 | 5.770165000  | -2.328545000 | 0.150811000  |
| 6 | 3.027474000  | -2.600672000 | 0.452797000  |
| 1 | 3.573439000  | -3.425879000 | 0.927008000  |
| 1 | 2.087713000  | -2.438343000 | 0.987035000  |
| 1 | 2.791356000  | -2.902567000 | -0.571913000 |
| 6 | -1.009779000 | -2.355118000 | -1.017148000 |
| 8 | -0.912462000 | -1.899947000 | -2.171499000 |
| 6 | -2.269036000 | -2.087755000 | -0.228396000 |
| 6 | -2.380610000 | -2.371991000 | 1.137443000  |
| 6 | -3.391016000 | -1.616067000 | -0.914552000 |
| 6 | -3.593498000 | -2.198721000 | 1.797898000  |
| 1 | -1.510256000 | -2.703106000 | 1.695473000  |
| 6 | -4.608266000 | -1.445881000 | -0.256227000 |
| 1 | -3.298660000 | -1.392810000 | -1.972726000 |
| 6 | -4.714463000 | -1.741403000 | 1.101412000  |
| 1 | -3.664016000 | -2.413689000 | 2.860427000  |
| 1 | -5.471905000 | -1.078622000 | -0.803518000 |
| 1 | -5.660792000 | -1.607321000 | 1.617686000  |
| 6 | -0.212546000 | -3.585714000 | -0.642867000 |
| 1 | 0.743603000  | -3.573678000 | -1.167183000 |
| 1 | -0.038594000 | -3.688512000 | 0.428537000  |
| 1 | -0.785022000 | -4.460436000 | -0.983027000 |
| 6 | 1.216580000  | 2.505614000  | 0.483755000  |
| 1 | 2.296543000  | 2.704572000  | 0.658339000  |
| 6 | 0.529173000  | 3.672144000  | 0.455966000  |
| 1 | -0.557713000 | 3.654532000  | 0.299003000  |
| 6 | 1.090799000  | 5.070296000  | 0.615913000  |
| 1 | 2.177324000  | 5.044412000  | 0.769803000  |
| 1 | 0.895211000  | 5.699173000  | -0.265506000 |
| 1 | 0.647683000  | 5.598828000  | 1.472933000  |

**TSA7-8S<sub>X=CHCHMe</sub>**

Coordinates (Angstroms)

|    | X            | Y            | Z            |
|----|--------------|--------------|--------------|
| 25 | -0.824952000 | 0.567672000  | 0.370181000  |
| 1  | 0.445027000  | -0.672234000 | 0.469264000  |
| 7  | -0.800297000 | -0.076860000 | -1.665917000 |

|    |              |              |              |
|----|--------------|--------------|--------------|
| 1  | -0.176420000 | -0.888340000 | -1.616469000 |
| 6  | -0.824425000 | 0.989596000  | 2.048141000  |
| 8  | -0.875862000 | 1.305582000  | 3.196884000  |
| 6  | 1.045466000  | 1.464268000  | -2.056737000 |
| 6  | -2.121728000 | -0.587195000 | -2.007564000 |
| 6  | -0.244531000 | 0.880522000  | -2.620766000 |
| 1  | 1.466999000  | 2.193838000  | -2.753195000 |
| 1  | 1.779356000  | 0.669443000  | -1.885119000 |
| 1  | -0.035160000 | 0.412517000  | -3.594253000 |
| 1  | -0.982132000 | 1.675325000  | -2.781822000 |
| 1  | -2.112471000 | -1.240608000 | -2.891187000 |
| 1  | -2.774599000 | 0.266736000  | -2.222715000 |
| 6  | -2.682689000 | -1.319544000 | -0.817786000 |
| 6  | -3.638873000 | -2.323341000 | -0.955435000 |
| 1  | -3.949427000 | -2.630855000 | -1.949401000 |
| 6  | -2.772897000 | -1.479593000 | 1.481438000  |
| 1  | -2.391823000 | -1.122808000 | 2.431987000  |
| 6  | -4.185218000 | -2.909419000 | 0.180963000  |
| 1  | -4.936120000 | -3.688970000 | 0.097335000  |
| 6  | -3.743967000 | -2.469779000 | 1.427176000  |
| 1  | -4.136886000 | -2.888683000 | 2.347514000  |
| 7  | -2.238664000 | -0.906443000 | 0.388544000  |
| 16 | 0.629002000  | 2.258737000  | -0.464736000 |
| 6  | 2.285329000  | 2.556395000  | 0.325522000  |
| 6  | 1.989200000  | 3.524511000  | 1.475721000  |
| 6  | 3.239719000  | 3.203739000  | -0.679897000 |
| 1  | 1.256575000  | 3.100773000  | 2.171164000  |
| 1  | 2.913041000  | 3.719924000  | 2.032809000  |
| 1  | 1.603000000  | 4.481216000  | 1.107657000  |
| 1  | 3.516333000  | 2.509454000  | -1.479836000 |
| 1  | 2.804546000  | 4.101338000  | -1.132525000 |
| 1  | 4.162026000  | 3.497432000  | -0.164201000 |
| 6  | 2.878986000  | 1.262665000  | 0.871911000  |
| 1  | 3.846067000  | 1.474328000  | 1.345692000  |
| 1  | 2.214260000  | 0.809543000  | 1.611017000  |
| 1  | 3.044102000  | 0.530549000  | 0.077881000  |
| 6  | 0.940042000  | -2.479710000 | -0.152761000 |
| 8  | 0.458794000  | -2.585665000 | -1.297050000 |
| 6  | 2.408130000  | -2.154185000 | -0.017809000 |
| 6  | 3.074051000  | -2.166117000 | 1.212772000  |
| 6  | 3.140882000  | -1.880741000 | -1.177984000 |
| 6  | 4.440147000  | -1.900755000 | 1.280872000  |
| 1  | 2.528777000  | -2.363700000 | 2.129970000  |
| 6  | 4.505798000  | -1.609574000 | -1.111670000 |

|   |              |              |              |
|---|--------------|--------------|--------------|
| 1 | 2.623371000  | -1.883417000 | -2.132188000 |
| 6 | 5.161169000  | -1.618615000 | 0.119974000  |
| 1 | 4.941408000  | -1.907587000 | 2.244567000  |
| 1 | 5.058363000  | -1.393985000 | -2.022060000 |
| 1 | 6.225481000  | -1.408740000 | 0.176190000  |
| 6 | 0.254664000  | -3.186507000 | 0.996147000  |
| 1 | -0.812637000 | -3.254501000 | 0.781444000  |
| 1 | 0.663037000  | -4.204811000 | 1.060252000  |
| 1 | 0.395749000  | -2.694912000 | 1.959250000  |
| 6 | -2.328919000 | 1.959321000  | 0.062753000  |
| 1 | -2.018482000 | 3.027143000  | 0.069944000  |
| 6 | -3.671703000 | 1.866146000  | -0.085263000 |
| 1 | -4.143940000 | 0.875119000  | -0.104395000 |
| 6 | -4.659742000 | 3.004838000  | -0.237365000 |
| 1 | -5.200420000 | 2.959612000  | -1.194529000 |
| 1 | -5.428415000 | 2.993290000  | 0.549285000  |
| 1 | -4.152905000 | 3.977198000  | -0.189238000 |

**A8R<sub>X=CHCHMe</sub>**

Coordinates (Angstroms)

|    | X            | Y            | Z            |
|----|--------------|--------------|--------------|
| 25 | -0.943481000 | 0.724698000  | -0.092338000 |
| 1  | 0.702358000  | -1.427764000 | -1.016036000 |
| 7  | -0.239779000 | 0.021584000  | 1.615292000  |
| 1  | 0.331316000  | -1.524898000 | 1.095556000  |
| 6  | -1.197469000 | 0.691904000  | -1.807081000 |
| 8  | -1.294559000 | 0.600976000  | -2.994684000 |
| 6  | -2.252516000 | -1.245229000 | 2.085070000  |
| 6  | 0.928544000  | 0.696687000  | 2.124548000  |
| 6  | -1.139464000 | -0.387963000 | 2.674248000  |
| 1  | -3.047290000 | -1.433317000 | 2.811120000  |
| 1  | -1.839878000 | -2.200866000 | 1.751363000  |
| 1  | -0.627624000 | -0.989310000 | 3.449150000  |
| 1  | -1.574989000 | 0.483833000  | 3.200539000  |
| 1  | 1.632797000  | 0.025399000  | 2.652142000  |
| 1  | 0.656346000  | 1.478623000  | 2.861149000  |
| 6  | 1.650193000  | 1.379175000  | 0.996826000  |
| 6  | 2.950931000  | 1.868888000  | 1.123396000  |
| 1  | 3.486420000  | 1.719592000  | 2.055981000  |
| 6  | 1.515430000  | 2.171125000  | -1.170383000 |
| 1  | 0.909104000  | 2.266557000  | -2.064633000 |
| 6  | 3.534805000  | 2.539243000  | 0.058787000  |
| 1  | 4.545860000  | 2.927317000  | 0.136079000  |



|    |              |              |              |
|----|--------------|--------------|--------------|
| 6  | 2.796564000  | 2.695635000  | -1.114760000 |
| 1  | 3.207371000  | 3.207249000  | -1.978498000 |
| 7  | 0.941765000  | 1.518016000  | -0.141361000 |
| 16 | -2.923069000 | -0.365326000 | 0.624896000  |
| 6  | -3.536488000 | -1.767276000 | -0.435819000 |
| 6  | -4.320551000 | -1.096952000 | -1.567620000 |
| 6  | -4.464306000 | -2.667151000 | 0.383980000  |
| 1  | -3.692247000 | -0.398555000 | -2.128280000 |
| 1  | -4.679298000 | -1.863841000 | -2.264377000 |
| 1  | -5.190522000 | -0.553341000 | -1.183696000 |
| 1  | -3.926478000 | -3.195847000 | 1.177375000  |
| 1  | -5.279463000 | -2.095399000 | 0.840272000  |
| 1  | -4.907679000 | -3.423167000 | -0.275393000 |
| 6  | -2.364933000 | -2.568572000 | -1.002867000 |
| 1  | -2.748072000 | -3.408267000 | -1.596290000 |
| 1  | -1.744152000 | -1.939931000 | -1.646697000 |
| 1  | -1.723066000 | -2.971667000 | -0.214112000 |
| 6  | 1.284646000  | -2.185388000 | -0.461278000 |
| 8  | 0.681824000  | -2.417486000 | 0.787053000  |
| 6  | 2.706143000  | -1.652724000 | -0.321118000 |
| 6  | 3.319326000  | -0.989285000 | -1.389150000 |
| 6  | 3.431396000  | -1.842383000 | 0.857231000  |
| 6  | 4.632409000  | -0.534442000 | -1.286009000 |
| 1  | 2.758896000  | -0.817662000 | -2.305948000 |
| 6  | 4.745984000  | -1.386663000 | 0.965675000  |
| 1  | 2.949769000  | -2.339843000 | 1.693446000  |
| 6  | 5.352581000  | -0.733802000 | -0.106819000 |
| 1  | 5.090658000  | -0.013666000 | -2.122407000 |
| 1  | 5.294100000  | -1.537867000 | 1.891900000  |
| 1  | 6.373490000  | -0.371967000 | -0.021941000 |
| 6  | 1.270672000  | -3.483980000 | -1.264184000 |
| 1  | 0.241342000  | -3.828230000 | -1.405977000 |
| 1  | 1.728260000  | -3.342335000 | -2.248709000 |
| 1  | 1.828808000  | -4.263964000 | -0.733111000 |
| 6  | -1.748721000 | 2.501931000  | 0.273646000  |
| 1  | -1.628805000 | 2.761198000  | 1.352851000  |
| 6  | -2.386166000 | 3.490216000  | -0.394800000 |
| 1  | -2.572917000 | 3.365489000  | -1.468834000 |
| 6  | -2.894790000 | 4.797022000  | 0.175091000  |
| 1  | -2.417983000 | 5.667687000  | -0.298249000 |
| 1  | -3.976997000 | 4.920958000  | 0.024890000  |
| 1  | -2.700650000 | 4.860333000  | 1.253376000  |

-----

**A8S**<sub>X=CHCHMe</sub>

-----  
Coordinates (Angstroms)  
-----

|    | X            | Y            | Z            |
|----|--------------|--------------|--------------|
| 25 | 1.179105000  | 0.459207000  | -0.173075000 |
| 1  | -0.917357000 | -1.098995000 | -0.366845000 |
| 7  | 0.980399000  | -0.111514000 | 1.725568000  |
| 1  | -0.447627000 | -1.000809000 | 1.655116000  |
| 6  | 0.832118000  | 0.640317000  | -1.863193000 |
| 8  | 0.553314000  | 0.718716000  | -3.021479000 |
| 6  | -0.281934000 | 1.868802000  | 2.300051000  |
| 6  | 1.931459000  | -1.125427000 | 2.114574000  |
| 6  | 0.774710000  | 0.874846000  | 2.763014000  |
| 1  | -0.384788000 | 2.704747000  | 2.996508000  |
| 1  | -1.245399000 | 1.359642000  | 2.202930000  |
| 1  | 0.423388000  | 0.422544000  | 3.709601000  |
| 1  | 1.711228000  | 1.414252000  | 3.008308000  |
| 1  | 1.587709000  | -1.759570000 | 2.952810000  |
| 1  | 2.888914000  | -0.677298000 | 2.450203000  |
| 6  | 2.226083000  | -1.995171000 | 0.925367000  |
| 6  | 2.738276000  | -3.288092000 | 1.035106000  |
| 1  | 2.924311000  | -3.706687000 | 2.019411000  |
| 6  | 2.211091000  | -2.147329000 | -1.381703000 |
| 1  | 1.984042000  | -1.656975000 | -2.322033000 |
| 6  | 2.994969000  | -4.021074000 | -0.116487000 |
| 1  | 3.392959000  | -5.029253000 | -0.053367000 |
| 6  | 2.724982000  | -3.435043000 | -1.352818000 |
| 1  | 2.904133000  | -3.963790000 | -2.282836000 |
| 7  | 1.959433000  | -1.431098000 | -0.270744000 |
| 16 | 0.231197000  | 2.472283000  | 0.649946000  |
| 6  | -1.377328000 | 3.033359000  | -0.099645000 |
| 6  | -0.981106000 | 3.769876000  | -1.382677000 |
| 6  | -2.090402000 | 3.987879000  | 0.860148000  |
| 1  | -0.408566000 | 3.120587000  | -2.052114000 |
| 1  | -1.886280000 | 4.091801000  | -1.910771000 |
| 1  | -0.380188000 | 4.659289000  | -1.164030000 |
| 1  | -2.426428000 | 3.476058000  | 1.767494000  |
| 1  | -1.443724000 | 4.822504000  | 1.151466000  |
| 1  | -2.977888000 | 4.401485000  | 0.366323000  |
| 6  | -2.264622000 | 1.835297000  | -0.430072000 |
| 1  | -3.198562000 | 2.181948000  | -0.889902000 |
| 1  | -1.762875000 | 1.160527000  | -1.128006000 |
| 1  | -2.529374000 | 1.263893000  | 0.464594000  |
| 6  | -1.532882000 | -1.794504000 | 0.234076000  |
| 8  | -1.277768000 | -1.581935000 | 1.598177000  |
| 6  | -2.986040000 | -1.508497000 | -0.107705000 |

|   |              |              |              |
|---|--------------|--------------|--------------|
| 6 | -3.369000000 | -1.359072000 | -1.446160000 |
| 6 | -3.959118000 | -1.382559000 | 0.885126000  |
| 6 | -4.692467000 | -1.087466000 | -1.785181000 |
| 1 | -2.616728000 | -1.435222000 | -2.228545000 |
| 6 | -5.288179000 | -1.114191000 | 0.549787000  |
| 1 | -3.663917000 | -1.481210000 | 1.924802000  |
| 6 | -5.660196000 | -0.963858000 | -0.785599000 |
| 1 | -4.967209000 | -0.961740000 | -2.828986000 |
| 1 | -6.033473000 | -1.017503000 | 1.334967000  |
| 1 | -6.692788000 | -0.748825000 | -1.045766000 |
| 6 | -1.147557000 | -3.221878000 | -0.169611000 |
| 1 | -0.090882000 | -3.398446000 | 0.055260000  |
| 1 | -1.747610000 | -3.948264000 | 0.390933000  |
| 1 | -1.305697000 | -3.392828000 | -1.240172000 |
| 6 | 2.980978000  | 1.296209000  | -0.229382000 |
| 1 | 3.385005000  | 1.468457000  | 0.796855000  |
| 6 | 3.872731000  | 1.670579000  | -1.175444000 |
| 1 | 3.597153000  | 1.554982000  | -2.231238000 |
| 6 | 5.256816000  | 2.242549000  | -0.954975000 |
| 1 | 6.042213000  | 1.597193000  | -1.374733000 |
| 1 | 5.378725000  | 3.225609000  | -1.432447000 |
| 1 | 5.467332000  | 2.365915000  | 0.115030000  |

**Al<sub>X=NCMe</sub>**

Coordinates (Angstroms)

|    | X            | Y            | Z            |
|----|--------------|--------------|--------------|
| 25 | -0.201415000 | 0.020669000  | 0.084955000  |
| 7  | -0.513589000 | -1.689973000 | -0.635002000 |
| 6  | 0.060982000  | 0.443342000  | 1.756305000  |
| 8  | 0.167678000  | 0.602271000  | 2.922077000  |
| 6  | 1.850590000  | -2.238564000 | -0.601481000 |
| 6  | -1.864599000 | -2.169827000 | -0.774782000 |
| 6  | 0.476768000  | -2.618255000 | -1.144711000 |
| 1  | 2.660187000  | -2.724144000 | -1.152898000 |
| 1  | 1.911186000  | -2.511092000 | 0.454491000  |
| 1  | 0.266141000  | -3.656141000 | -0.833697000 |
| 1  | 0.497079000  | -2.623346000 | -2.249628000 |
| 1  | -2.037448000 | -3.116565000 | -0.229785000 |
| 1  | -2.127750000 | -2.382129000 | -1.827437000 |
| 6  | -2.814914000 | -1.132788000 | -0.248476000 |
| 6  | -4.199522000 | -1.307404000 | -0.231525000 |
| 1  | -4.625863000 | -2.229951000 | -0.612978000 |
| 6  | -3.023636000 | 0.969321000  | 0.702406000  |

|    |              |              |              |
|----|--------------|--------------|--------------|
| 1  | -2.509669000 | 1.852106000  | 1.068451000  |
| 6  | -5.006251000 | -0.296989000 | 0.271636000  |
| 1  | -6.085312000 | -0.413308000 | 0.295734000  |
| 6  | -4.404253000 | 0.868299000  | 0.749776000  |
| 1  | -4.992172000 | 1.684152000  | 1.155681000  |
| 7  | -2.237328000 | -0.007449000 | 0.212509000  |
| 16 | 1.977227000  | -0.423414000 | -0.722041000 |
| 6  | 3.469881000  | 0.009511000  | 0.299111000  |
| 6  | 3.404379000  | 1.531340000  | 0.457258000  |
| 6  | 4.725682000  | -0.395158000 | -0.476598000 |
| 1  | 2.520798000  | 1.833085000  | 1.027945000  |
| 1  | 4.296377000  | 1.876317000  | 0.992129000  |
| 1  | 3.377836000  | 2.037203000  | -0.514351000 |
| 1  | 4.757138000  | -1.475245000 | -0.655037000 |
| 1  | 4.781938000  | 0.117471000  | -1.442097000 |
| 1  | 5.616718000  | -0.127583000 | 0.104296000  |
| 6  | 3.446770000  | -0.668515000 | 1.668312000  |
| 1  | 4.248061000  | -0.246479000 | 2.286212000  |
| 1  | 2.496728000  | -0.505561000 | 2.183364000  |
| 1  | 3.625137000  | -1.745281000 | 1.593136000  |
| 6  | -0.183846000 | 2.916879000  | -1.121104000 |
| 6  | -0.193007000 | 4.235955000  | -1.734395000 |
| 1  | -1.219836000 | 4.519237000  | -1.978867000 |
| 1  | 0.226661000  | 4.969785000  | -1.041666000 |
| 1  | 0.402324000  | 4.223159000  | -2.650802000 |
| 7  | -0.177380000 | 1.869017000  | -0.627567000 |

**A2**<sub>X=NCMe</sub>

Coordinates (Angstroms)

|    | X            | Y            | Z            |
|----|--------------|--------------|--------------|
| 25 | -0.098128000 | -0.399891000 | 0.087938000  |
| 7  | -0.441443000 | 0.963910000  | -1.426960000 |
| 6  | 0.150806000  | -1.623603000 | 1.337046000  |
| 8  | 0.307206000  | -2.430689000 | 2.177058000  |
| 6  | 1.915303000  | 1.528459000  | -1.468007000 |
| 6  | -1.800511000 | 1.426384000  | -1.357297000 |
| 6  | 0.487360000  | 2.058841000  | -1.504193000 |
| 1  | 2.652256000  | 2.335330000  | -1.469033000 |
| 1  | 2.093045000  | 0.874958000  | -2.327475000 |
| 1  | 0.376376000  | 2.645859000  | -2.436779000 |
| 1  | 0.359268000  | 2.792726000  | -0.674128000 |
| 1  | -2.174005000 | 1.869878000  | -2.299482000 |
| 1  | -1.944973000 | 2.221115000  | -0.587169000 |

|    |              |              |              |
|----|--------------|--------------|--------------|
| 6  | -2.697780000 | 0.282759000  | -0.967699000 |
| 6  | -4.055427000 | 0.234177000  | -1.287049000 |
| 1  | -4.495678000 | 1.040337000  | -1.865439000 |
| 6  | -2.849530000 | -1.741703000 | 0.147523000  |
| 1  | -2.329100000 | -2.508331000 | 0.711862000  |
| 6  | -4.820767000 | -0.844337000 | -0.862813000 |
| 1  | -5.878531000 | -0.899831000 | -1.101297000 |
| 6  | -4.203391000 | -1.857036000 | -0.130154000 |
| 1  | -4.754679000 | -2.722457000 | 0.220557000  |
| 7  | -2.105709000 | -0.698164000 | -0.256132000 |
| 16 | 2.077831000  | 0.546286000  | 0.067134000  |
| 6  | 3.528064000  | -0.568806000 | -0.268585000 |
| 6  | 3.843093000  | -1.226740000 | 1.077908000  |
| 6  | 4.713905000  | 0.282248000  | -0.729294000 |
| 1  | 2.981126000  | -1.779561000 | 1.463983000  |
| 1  | 4.668109000  | -1.936659000 | 0.949394000  |
| 1  | 4.144697000  | -0.485984000 | 1.825662000  |
| 1  | 4.542998000  | 0.721786000  | -1.716956000 |
| 1  | 4.926990000  | 1.089496000  | -0.020880000 |
| 1  | 5.605172000  | -0.352362000 | -0.798969000 |
| 6  | 3.196497000  | -1.638217000 | -1.308328000 |
| 1  | 4.104794000  | -2.208678000 | -1.536754000 |
| 1  | 2.443282000  | -2.335737000 | -0.932462000 |
| 1  | 2.831144000  | -1.204613000 | -2.244624000 |
| 6  | -0.864357000 | 1.834049000  | 2.193847000  |
| 6  | -1.215802000 | 2.877308000  | 3.143865000  |
| 1  | -1.922764000 | 3.571229000  | 2.682496000  |
| 1  | -1.673683000 | 2.431763000  | 4.030095000  |
| 1  | -0.315953000 | 3.422674000  | 3.438732000  |
| 7  | -0.584661000 | 1.010524000  | 1.432882000  |
| 1  | 0.240795000  | -1.783906000 | -0.923814000 |
| 1  | 0.227463000  | -1.173411000 | -1.425732000 |

A3<sub>X=NCMe</sub>

Coordinates (Angstroms)

|    | X            | Y            | Z            |
|----|--------------|--------------|--------------|
| 25 | -1.150035000 | 0.586992000  | -0.437793000 |
| 1  | -0.755089000 | -0.684005000 | -1.535019000 |
| 7  | -0.140547000 | -0.101192000 | 1.238196000  |
| 6  | -1.932065000 | 1.182833000  | -1.906053000 |
| 8  | -2.438227000 | 1.609608000  | -2.875136000 |
| 6  | -2.126421000 | -1.325953000 | 1.907513000  |
| 6  | 0.881396000  | 0.851236000  | 1.602676000  |

|    |              |              |              |
|----|--------------|--------------|--------------|
| 6  | -0.971426000 | -0.447443000 | 2.370349000  |
| 1  | -2.798978000 | -1.579507000 | 2.730422000  |
| 1  | -1.740634000 | -2.245025000 | 1.457154000  |
| 1  | -0.411041000 | -1.007288000 | 3.142386000  |
| 1  | -1.379443000 | 0.450112000  | 2.877980000  |
| 1  | 1.673049000  | 0.420697000  | 2.241088000  |
| 1  | 0.469926000  | 1.707741000  | 2.174590000  |
| 6  | 1.510563000  | 1.402230000  | 0.353303000  |
| 6  | 2.788411000  | 1.960502000  | 0.334958000  |
| 1  | 3.369933000  | 1.986211000  | 1.250822000  |
| 6  | 1.256255000  | 1.806830000  | -1.910937000 |
| 1  | 0.613401000  | 1.728138000  | -2.781193000 |
| 6  | 3.300769000  | 2.454997000  | -0.855622000 |
| 1  | 4.295357000  | 2.888554000  | -0.891436000 |
| 6  | 2.520215000  | 2.368569000  | -2.007801000 |
| 1  | 2.879061000  | 2.730680000  | -2.964917000 |
| 7  | 0.749658000  | 1.338874000  | -0.757797000 |
| 16 | -3.035390000 | -0.378240000 | 0.633633000  |
| 6  | -3.999269000 | -1.675918000 | -0.287269000 |
| 6  | -4.960058000 | -0.887991000 | -1.182792000 |
| 6  | -4.785875000 | -2.521252000 | 0.717756000  |
| 1  | -4.416494000 | -0.227891000 | -1.865853000 |
| 1  | -5.549965000 | -1.587114000 | -1.786356000 |
| 1  | -5.652393000 | -0.280670000 | -0.590529000 |
| 1  | -4.126761000 | -3.136269000 | 1.338455000  |
| 1  | -5.402377000 | -1.898080000 | 1.374032000  |
| 1  | -5.450823000 | -3.198082000 | 0.168866000  |
| 6  | -3.092690000 | -2.561882000 | -1.140190000 |
| 1  | -3.697449000 | -3.354111000 | -1.597291000 |
| 1  | -2.619871000 | -1.988987000 | -1.941881000 |
| 1  | -2.308108000 | -3.042393000 | -0.547016000 |
| 1  | -0.681601000 | -1.028994000 | -0.824387000 |
| 1  | 1.489571000  | -1.490725000 | -1.287991000 |
| 1  | 0.573850000  | -1.459560000 | 0.790084000  |
| 6  | 1.893535000  | -2.190657000 | -0.536514000 |
| 8  | 0.972606000  | -2.370591000 | 0.502232000  |
| 6  | 3.219861000  | -1.597287000 | -0.067824000 |
| 6  | 4.143045000  | -1.123651000 | -1.008175000 |
| 6  | 3.540926000  | -1.509490000 | 1.287281000  |
| 6  | 5.356536000  | -0.572514000 | -0.604116000 |
| 1  | 3.901869000  | -1.173383000 | -2.068222000 |
| 6  | 4.753859000  | -0.952790000 | 1.698008000  |
| 1  | 2.822842000  | -1.867311000 | 2.018747000  |
| 6  | 5.666166000  | -0.482119000 | 0.754945000  |

|   |              |              |              |
|---|--------------|--------------|--------------|
| 1 | 6.057641000  | -0.203161000 | -1.347708000 |
| 1 | 4.982828000  | -0.882472000 | 2.758134000  |
| 1 | 6.607910000  | -0.044615000 | 1.074036000  |
| 6 | 2.114233000  | -3.539366000 | -1.220591000 |
| 1 | 1.165686000  | -3.915147000 | -1.618061000 |
| 1 | 2.829006000  | -3.457690000 | -2.045886000 |
| 1 | 2.501586000  | -4.267437000 | -0.498520000 |
| 7 | -1.571163000 | 2.285654000  | 0.549850000  |
| 6 | -1.808817000 | 3.268214000  | 1.109241000  |
| 6 | -2.096213000 | 4.503402000  | 1.820439000  |
| 1 | -3.176184000 | 4.663485000  | 1.861915000  |
| 1 | -1.701084000 | 4.439625000  | 2.837313000  |
| 1 | -1.626385000 | 5.343210000  | 1.302934000  |

**TSA3-4<sub>X=NCMe</sub>**

| Coordinates (Angstroms) |              |              |              |
|-------------------------|--------------|--------------|--------------|
|                         | X            | Y            | Z            |
| 25                      | 1.140042000  | 0.593363000  | 0.430109000  |
| 1                       | 0.741558000  | -0.660060000 | 1.540945000  |
| 7                       | 0.121842000  | -0.110282000 | -1.243379000 |
| 6                       | 1.927105000  | 1.199845000  | 1.892481000  |
| 8                       | 2.435599000  | 1.629020000  | 2.857423000  |
| 6                       | 2.108006000  | -1.352961000 | -1.889664000 |
| 6                       | -0.900961000 | 0.849718000  | -1.613550000 |
| 6                       | 0.963415000  | -0.472632000 | -2.372463000 |
| 1                       | 2.778622000  | -1.623212000 | -2.708499000 |
| 1                       | 1.709742000  | -2.261326000 | -1.428952000 |
| 1                       | 0.399146000  | -1.033270000 | -3.137260000 |
| 1                       | 1.369477000  | 0.424008000  | -2.870793000 |
| 1                       | -1.689808000 | 0.410484000  | -2.244963000 |
| 1                       | -0.472808000 | 1.687824000  | -2.189432000 |
| 6                       | -1.522863000 | 1.410258000  | -0.364415000 |
| 6                       | -2.803527000 | 1.960884000  | -0.346344000 |
| 1                       | -3.390528000 | 1.972073000  | -1.258947000 |
| 6                       | -1.258867000 | 1.835711000  | 1.893824000  |
| 1                       | -0.612493000 | 1.766457000  | 2.762135000  |
| 6                       | -3.312169000 | 2.463712000  | 0.842552000  |
| 1                       | -4.309114000 | 2.891528000  | 0.879721000  |
| 6                       | -2.524822000 | 2.392908000  | 1.990897000  |
| 1                       | -2.880774000 | 2.762062000  | 2.946334000  |
| 7                       | -0.755882000 | 1.359075000  | 0.742790000  |
| 16                      | 3.024119000  | -0.397981000 | -0.626012000 |
| 6                       | 3.972149000  | -1.695527000 | 0.312380000  |

|   |              |              |              |
|---|--------------|--------------|--------------|
| 6 | 4.936156000  | -0.905982000 | 1.202910000  |
| 6 | 4.755052000  | -2.556277000 | -0.682367000 |
| 1 | 4.395722000  | -0.236442000 | 1.879194000  |
| 1 | 5.519809000  | -1.604062000 | 1.813605000  |
| 1 | 5.634076000  | -0.308583000 | 0.607164000  |
| 1 | 4.093196000  | -3.172215000 | -1.299158000 |
| 1 | 5.378162000  | -1.943777000 | -1.342403000 |
| 1 | 5.413131000  | -3.232568000 | -0.124729000 |
| 6 | 3.055304000  | -2.565725000 | 1.170510000  |
| 1 | 3.651809000  | -3.361149000 | 1.632783000  |
| 1 | 2.588731000  | -1.983124000 | 1.968819000  |
| 1 | 2.265531000  | -3.041998000 | 0.580927000  |
| 1 | 0.665931000  | -1.019460000 | 0.836477000  |
| 1 | -1.477336000 | -1.434039000 | 1.283078000  |
| 1 | -0.471588000 | -1.210016000 | -0.857847000 |
| 6 | -1.843237000 | -2.137912000 | 0.508722000  |
| 8 | -0.934067000 | -2.253738000 | -0.528736000 |
| 6 | -3.202878000 | -1.585533000 | 0.073035000  |
| 6 | -4.119534000 | -1.126837000 | 1.027255000  |
| 6 | -3.556835000 | -1.519679000 | -1.275194000 |
| 6 | -5.355575000 | -0.610903000 | 0.644740000  |
| 1 | -3.854022000 | -1.157850000 | 2.082533000  |
| 6 | -4.793453000 | -1.001775000 | -1.665920000 |
| 1 | -2.839148000 | -1.863752000 | -2.013979000 |
| 6 | -5.697802000 | -0.544332000 | -0.708178000 |
| 1 | -6.049897000 | -0.250765000 | 1.399397000  |
| 1 | -5.047736000 | -0.949834000 | -2.721576000 |
| 1 | -6.657646000 | -0.135070000 | -1.010809000 |
| 6 | -2.026608000 | -3.499304000 | 1.191678000  |
| 1 | -1.062940000 | -3.851825000 | 1.575517000  |
| 1 | -2.735429000 | -3.448572000 | 2.026202000  |
| 1 | -2.398030000 | -4.233028000 | 0.466183000  |
| 7 | 1.577856000  | 2.277939000  | -0.574701000 |
| 6 | 1.847889000  | 3.251938000  | -1.134300000 |
| 6 | 2.189238000  | 4.475838000  | -1.840855000 |
| 1 | 1.425479000  | 4.692830000  | -2.591361000 |
| 1 | 2.245464000  | 5.304852000  | -1.131455000 |
| 1 | 3.156707000  | 4.355535000  | -2.334236000 |

**A4**<sub>X=NCMe</sub>

| Coordinates (Angstroms) |             |             |             |
|-------------------------|-------------|-------------|-------------|
|                         | X           | Y           | Z           |
| 25                      | 1.079462000 | 0.650714000 | 0.429432000 |



|    |              |              |              |
|----|--------------|--------------|--------------|
| 1  | 0.592449000  | -0.648055000 | 1.443726000  |
| 7  | 0.110252000  | 0.080804000  | -1.344602000 |
| 6  | 1.829138000  | 1.148064000  | 1.951024000  |
| 8  | 2.319159000  | 1.507557000  | 2.951324000  |
| 6  | 2.073537000  | -1.200930000 | -1.959631000 |
| 6  | -0.914576000 | 1.065939000  | -1.670051000 |
| 6  | 1.003642000  | -0.240360000 | -2.456959000 |
| 1  | 2.772323000  | -1.458570000 | -2.758030000 |
| 1  | 1.597656000  | -2.107611000 | -1.574341000 |
| 1  | 0.458505000  | -0.716517000 | -3.284860000 |
| 1  | 1.456489000  | 0.681652000  | -2.842612000 |
| 1  | -1.676055000 | 0.670479000  | -2.355242000 |
| 1  | -0.446484000 | 1.926877000  | -2.164580000 |
| 6  | -1.563305000 | 1.532473000  | -0.394341000 |
| 6  | -2.854614000 | 2.052713000  | -0.366941000 |
| 1  | -3.426055000 | 2.109099000  | -1.287366000 |
| 6  | -1.344859000 | 1.821936000  | 1.888885000  |
| 1  | -0.713835000 | 1.708269000  | 2.763515000  |
| 6  | -3.393511000 | 2.470906000  | 0.842017000  |
| 1  | -4.400412000 | 2.873652000  | 0.887387000  |
| 6  | -2.623866000 | 2.346994000  | 1.996633000  |
| 1  | -3.003486000 | 2.647685000  | 2.966729000  |
| 7  | -0.812896000 | 1.427256000  | 0.720494000  |
| 16 | 2.968495000  | -0.377754000 | -0.590618000 |
| 6  | 3.760456000  | -1.799872000 | 0.314719000  |
| 6  | 4.749916000  | -1.149443000 | 1.285314000  |
| 6  | 4.509597000  | -2.672311000 | -0.696230000 |
| 1  | 4.245345000  | -0.457558000 | 1.967198000  |
| 1  | 5.223848000  | -1.930725000 | 1.890233000  |
| 1  | 5.538362000  | -0.604679000 | 0.755441000  |
| 1  | 3.824148000  | -3.223492000 | -1.347072000 |
| 1  | 5.183936000  | -2.077520000 | -1.321288000 |
| 1  | 5.111858000  | -3.408732000 | -0.152071000 |
| 6  | 2.730522000  | -2.625741000 | 1.085331000  |
| 1  | 3.216054000  | -3.530689000 | 1.469763000  |
| 1  | 2.336986000  | -2.064967000 | 1.937512000  |
| 1  | 1.884440000  | -2.927834000 | 0.459033000  |
| 1  | 0.476427000  | -0.981594000 | 0.728401000  |
| 1  | -1.393790000 | -1.857471000 | 1.442806000  |
| 1  | -0.349728000 | -0.834483000 | -1.041300000 |
| 6  | -1.678133000 | -2.367925000 | 0.487536000  |
| 8  | -0.693542000 | -2.284405000 | -0.452493000 |
| 6  | -2.995937000 | -1.696335000 | 0.069099000  |
| 6  | -3.930644000 | -1.273870000 | 1.021870000  |

|   |              |              |              |
|---|--------------|--------------|--------------|
| 6 | -3.299189000 | -1.511169000 | -1.281849000 |
| 6 | -5.139309000 | -0.694305000 | 0.637721000  |
| 1 | -3.704712000 | -1.394325000 | 2.080249000  |
| 6 | -4.506385000 | -0.931557000 | -1.675264000 |
| 1 | -2.561262000 | -1.819819000 | -2.017306000 |
| 6 | -5.433590000 | -0.521661000 | -0.716372000 |
| 1 | -5.847939000 | -0.365991000 | 1.393744000  |
| 1 | -4.721135000 | -0.792155000 | -2.731996000 |
| 1 | -6.371201000 | -0.063751000 | -1.019303000 |
| 6 | -1.976706000 | -3.833042000 | 0.872828000  |
| 1 | -1.054479000 | -4.308971000 | 1.225521000  |
| 1 | -2.734482000 | -3.915582000 | 1.663005000  |
| 1 | -2.331670000 | -4.382804000 | -0.008138000 |
| 7 | 1.615083000  | 2.362285000  | -0.461760000 |
| 6 | 1.934068000  | 3.359503000  | -0.950630000 |
| 6 | 2.335828000  | 4.613901000  | -1.565412000 |
| 1 | 1.589515000  | 4.916547000  | -2.303610000 |
| 1 | 2.418758000  | 5.387376000  | -0.798033000 |
| 1 | 3.302667000  | 4.487397000  | -2.058390000 |

**TSA4-5<sub>X</sub>=NCMe**

| Coordinates (Angstroms) |              |              |              |
|-------------------------|--------------|--------------|--------------|
|                         | X            | Y            | Z            |
| 25                      | 1.039515000  | 0.633379000  | 0.442009000  |
| 1                       | 0.565919000  | -0.806311000 | 1.244268000  |
| 7                       | 0.081153000  | 0.146702000  | -1.383424000 |
| 6                       | 1.750946000  | 0.993186000  | 2.010152000  |
| 8                       | 2.213795000  | 1.222508000  | 3.064698000  |
| 6                       | 2.045571000  | -1.137030000 | -2.008612000 |
| 6                       | -0.925707000 | 1.161610000  | -1.676296000 |
| 6                       | 0.978099000  | -0.167257000 | -2.496753000 |
| 1                       | 2.742386000  | -1.383119000 | -2.812545000 |
| 1                       | 1.574385000  | -2.052914000 | -1.639425000 |
| 1                       | 0.435729000  | -0.625343000 | -3.335858000 |
| 1                       | 1.435150000  | 0.760389000  | -2.861041000 |
| 1                       | -1.678795000 | 0.813977000  | -2.395345000 |
| 1                       | -0.431441000 | 2.036915000  | -2.115082000 |
| 6                       | -1.592021000 | 1.565598000  | -0.386954000 |
| 6                       | -2.882480000 | 2.087782000  | -0.356347000 |
| 1                       | -3.436029000 | 2.196505000  | -1.283079000 |
| 6                       | -1.412404000 | 1.735576000  | 1.910220000  |
| 1                       | -0.797561000 | 1.572451000  | 2.788593000  |
| 6                       | -3.441508000 | 2.445361000  | 0.863256000  |

|    |              |              |              |
|----|--------------|--------------|--------------|
| 1  | -4.447898000 | 2.849105000  | 0.911844000  |
| 6  | -2.692453000 | 2.258370000  | 2.022625000  |
| 1  | -3.088953000 | 2.507943000  | 3.000478000  |
| 7  | -0.860095000 | 1.399349000  | 0.733144000  |
| 16 | 2.937501000  | -0.330795000 | -0.629532000 |
| 6  | 3.798957000  | -1.746247000 | 0.219011000  |
| 6  | 4.788197000  | -1.080566000 | 1.180159000  |
| 6  | 4.553716000  | -2.571445000 | -0.826364000 |
| 1  | 4.274723000  | -0.426371000 | 1.891874000  |
| 1  | 5.310024000  | -1.856395000 | 1.751962000  |
| 1  | 5.538350000  | -0.490913000 | 0.642833000  |
| 1  | 3.871984000  | -3.127373000 | -1.477328000 |
| 1  | 5.199682000  | -1.943983000 | -1.449539000 |
| 1  | 5.186251000  | -3.303212000 | -0.310774000 |
| 6  | 2.819705000  | -2.624248000 | 0.995381000  |
| 1  | 3.357704000  | -3.495641000 | 1.387938000  |
| 1  | 2.386272000  | -2.078703000 | 1.837439000  |
| 1  | 1.995791000  | -2.980887000 | 0.369949000  |
| 1  | 0.217074000  | -1.264626000 | 0.581020000  |
| 1  | -1.505124000 | -1.840085000 | 1.634943000  |
| 1  | -0.388998000 | -0.735776000 | -1.096583000 |
| 6  | -1.681559000 | -2.346896000 | 0.657045000  |
| 8  | -0.585217000 | -2.206150000 | -0.163743000 |
| 6  | -2.951960000 | -1.708090000 | 0.089575000  |
| 6  | -3.983483000 | -1.289112000 | 0.937514000  |
| 6  | -3.122019000 | -1.554230000 | -1.288829000 |
| 6  | -5.157505000 | -0.739498000 | 0.424688000  |
| 1  | -3.860011000 | -1.388431000 | 2.014502000  |
| 6  | -4.293870000 | -1.003802000 | -1.809548000 |
| 1  | -2.316660000 | -1.862801000 | -1.950044000 |
| 6  | -5.317958000 | -0.594867000 | -0.954533000 |
| 1  | -5.942270000 | -0.412343000 | 1.101692000  |
| 1  | -4.406603000 | -0.887779000 | -2.884482000 |
| 1  | -6.228102000 | -0.160100000 | -1.358237000 |
| 6  | -1.955333000 | -3.826570000 | 0.976884000  |
| 1  | -1.064168000 | -4.270947000 | 1.433770000  |
| 1  | -2.799057000 | -3.951984000 | 1.666812000  |
| 1  | -2.178016000 | -4.374464000 | 0.052901000  |
| 7  | 1.589956000  | 2.392379000  | -0.354082000 |
| 6  | 1.918627000  | 3.408962000  | -0.796529000 |
| 6  | 2.334273000  | 4.685928000  | -1.354343000 |
| 1  | 1.602408000  | 5.020242000  | -2.093579000 |
| 1  | 2.406151000  | 5.430336000  | -0.557555000 |
| 1  | 3.309120000  | 4.575925000  | -1.835544000 |

A5<sub>X=NCMe</sub>

Coordinates (Angstroms)

|    | X            | Y            | Z            |
|----|--------------|--------------|--------------|
| 25 | 0.909002000  | 0.712020000  | 0.475108000  |
| 1  | 0.356963000  | -0.689521000 | 1.182704000  |
| 7  | -0.058972000 | 0.101162000  | -1.344178000 |
| 1  | -0.566004000 | -0.743241000 | -1.081769000 |
| 6  | 1.575343000  | 1.118686000  | 2.035597000  |
| 8  | 1.987031000  | 1.347142000  | 3.119136000  |
| 6  | 1.960006000  | -1.165625000 | -1.905395000 |
| 6  | -1.040344000 | 1.125155000  | -1.706727000 |
| 6  | 0.857431000  | -0.258268000 | -2.434245000 |
| 1  | 2.656747000  | -1.417234000 | -2.708186000 |
| 1  | 1.531850000  | -2.087063000 | -1.500227000 |
| 1  | 0.330081000  | -0.767187000 | -3.252823000 |
| 1  | 1.287736000  | 0.664936000  | -2.837073000 |
| 1  | -1.812573000 | 0.744306000  | -2.387256000 |
| 1  | -0.515554000 | 1.934716000  | -2.226298000 |
| 6  | -1.675783000 | 1.678745000  | -0.457261000 |
| 6  | -2.922666000 | 2.297662000  | -0.486796000 |
| 1  | -3.466670000 | 2.356668000  | -1.423846000 |
| 6  | -1.482942000 | 2.057716000  | 1.811523000  |
| 1  | -0.881077000 | 1.933997000  | 2.705163000  |
| 6  | -3.451780000 | 2.819164000  | 0.686761000  |
| 1  | -4.422582000 | 3.304573000  | 0.687192000  |
| 6  | -2.717656000 | 2.689319000  | 1.863021000  |
| 1  | -3.090460000 | 3.067854000  | 2.808451000  |
| 7  | -0.956145000 | 1.568084000  | 0.677036000  |
| 16 | 2.830272000  | -0.260418000 | -0.576298000 |
| 6  | 3.804025000  | -1.580798000 | 0.299535000  |
| 6  | 4.732885000  | -0.804231000 | 1.238730000  |
| 6  | 4.622910000  | -2.370613000 | -0.723996000 |
| 1  | 4.162084000  | -0.176835000 | 1.930793000  |
| 1  | 5.323853000  | -1.511443000 | 1.831732000  |
| 1  | 5.425363000  | -0.165723000 | 0.679988000  |
| 1  | 3.984637000  | -2.979895000 | -1.371910000 |
| 1  | 5.232084000  | -1.711926000 | -1.352084000 |
| 1  | 5.297599000  | -3.051191000 | -0.191509000 |
| 6  | 2.904737000  | -2.515892000 | 1.103042000  |
| 1  | 3.526811000  | -3.283410000 | 1.579920000  |
| 1  | 2.365144000  | -1.970520000 | 1.881433000  |
| 1  | 2.168868000  | -3.022160000 | 0.471548000  |

|   |              |              |              |
|---|--------------|--------------|--------------|
| 1 | -1.461950000 | -2.834295000 | 1.720166000  |
| 1 | 0.012663000  | -1.908355000 | 0.419014000  |
| 6 | -1.596797000 | -2.992566000 | 0.640612000  |
| 8 | -0.381468000 | -2.702616000 | -0.031814000 |
| 6 | -2.729212000 | -2.089137000 | 0.174790000  |
| 6 | -3.577212000 | -1.472538000 | 1.097964000  |
| 6 | -2.965556000 | -1.895436000 | -1.190881000 |
| 6 | -4.652533000 | -0.693662000 | 0.669409000  |
| 1 | -3.393266000 | -1.601636000 | 2.162036000  |
| 6 | -4.035726000 | -1.114555000 | -1.623203000 |
| 1 | -2.302850000 | -2.357753000 | -1.918605000 |
| 6 | -4.887098000 | -0.516056000 | -0.693163000 |
| 1 | -5.299648000 | -0.216936000 | 1.400310000  |
| 1 | -4.205510000 | -0.970998000 | -2.686802000 |
| 1 | -5.718644000 | 0.096941000  | -1.028848000 |
| 6 | -1.929059000 | -4.460171000 | 0.399919000  |
| 1 | -1.124214000 | -5.096601000 | 0.780574000  |
| 1 | -2.859986000 | -4.733760000 | 0.906937000  |
| 1 | -2.051199000 | -4.653924000 | -0.671604000 |
| 7 | 1.464997000  | 2.419007000  | -0.464418000 |
| 6 | 1.786068000  | 3.409686000  | -0.969935000 |
| 6 | 2.191276000  | 4.654716000  | -1.604176000 |
| 1 | 3.259800000  | 4.818646000  | -1.444232000 |
| 1 | 1.992208000  | 4.604518000  | -2.677597000 |
| 1 | 1.632720000  | 5.488849000  | -1.172628000 |

**TSA2-6<sub>X=NCMe</sub>**

| -----                   |              |              |              |
|-------------------------|--------------|--------------|--------------|
| Coordinates (Angstroms) |              |              |              |
|                         | X            | Y            | Z            |
| -----                   |              |              |              |
| 25                      | 0.090532000  | 0.369183000  | 0.002425000  |
| 7                       | 0.434490000  | -1.294588000 | -1.217995000 |
| 6                       | -0.209009000 | 1.949947000  | 0.706599000  |
| 8                       | -0.405052000 | 3.030689000  | 1.130282000  |
| 6                       | -1.938903000 | -1.805005000 | -1.136387000 |
| 6                       | 1.807131000  | -1.710890000 | -1.113352000 |
| 6                       | -0.523124000 | -2.364805000 | -1.101530000 |
| 1                       | -2.680155000 | -2.596238000 | -1.002660000 |
| 1                       | -2.120453000 | -1.303022000 | -2.091445000 |
| 1                       | -0.432031000 | -3.100633000 | -1.920095000 |
| 1                       | -0.378158000 | -2.929962000 | -0.158699000 |
| 1                       | 2.159006000  | -2.286607000 | -1.986607000 |
| 1                       | 1.957434000  | -2.372636000 | -0.235000000 |
| 6                       | 2.697105000  | -0.510786000 | -0.921808000 |

|    |              |              |              |
|----|--------------|--------------|--------------|
| 6  | 4.052074000  | -0.523326000 | -1.252599000 |
| 1  | 4.485228000  | -1.413665000 | -1.697154000 |
| 6  | 2.860608000  | 1.664163000  | -0.151232000 |
| 1  | 2.347915000  | 2.516679000  | 0.279916000  |
| 6  | 4.825006000  | 0.604392000  | -1.007136000 |
| 1  | 5.882054000  | 0.614125000  | -1.254459000 |
| 6  | 4.215317000  | 1.723153000  | -0.443249000 |
| 1  | 4.771690000  | 2.630642000  | -0.236172000 |
| 7  | 2.108957000  | 0.574438000  | -0.380038000 |
| 16 | -2.083055000 | -0.577321000 | 0.213962000  |
| 6  | -3.536116000 | 0.462713000  | -0.305410000 |
| 6  | -3.859839000 | 1.330075000  | 0.914725000  |
| 6  | -4.718904000 | -0.453262000 | -0.630654000 |
| 1  | -3.003191000 | 1.945029000  | 1.208197000  |
| 1  | -4.688125000 | 2.003444000  | 0.666432000  |
| 1  | -4.161704000 | 0.720424000  | 1.772870000  |
| 1  | -4.542082000 | -1.036768000 | -1.539451000 |
| 1  | -4.932878000 | -1.144476000 | 0.191376000  |
| 1  | -5.611500000 | 0.160230000  | -0.799316000 |
| 6  | -3.194838000 | 1.347088000  | -1.503612000 |
| 1  | -4.089750000 | 1.908504000  | -1.798676000 |
| 1  | -2.404850000 | 2.060423000  | -1.256122000 |
| 1  | -2.868796000 | 0.761478000  | -2.369062000 |
| 6  | 0.921537000  | -1.120370000 | 2.669881000  |
| 6  | 1.349957000  | -1.811829000 | 3.875714000  |
| 1  | 2.121608000  | -2.543525000 | 3.624930000  |
| 1  | 1.755292000  | -1.090064000 | 4.589207000  |
| 1  | 0.498864000  | -2.325726000 | 4.328759000  |
| 1  | -0.215093000 | 0.919094000  | -1.580772000 |
| 1  | 0.047572000  | -0.021241000 | -1.654864000 |
| 7  | 0.587995000  | -0.565709000 | 1.711302000  |

A6<sub>X=NCMe</sub>

Coordinates (Angstroms)

|    | X            | Y            | Z            |
|----|--------------|--------------|--------------|
| 25 | 0.105240000  | 0.463784000  | 0.010204000  |
| 7  | 0.469530000  | -1.177461000 | -1.327138000 |
| 6  | -0.177214000 | 1.901737000  | 0.955342000  |
| 8  | -0.383410000 | 2.908527000  | 1.540720000  |
| 6  | -1.919037000 | -1.684474000 | -1.244573000 |
| 6  | 1.859136000  | -1.611619000 | -1.172678000 |
| 6  | -0.512187000 | -2.263190000 | -1.221786000 |
| 1  | -2.657463000 | -2.484570000 | -1.154586000 |

|    |              |              |              |
|----|--------------|--------------|--------------|
| 1  | -2.090816000 | -1.149508000 | -2.183731000 |
| 1  | -0.405586000 | -2.989939000 | -2.038560000 |
| 1  | -0.332297000 | -2.790467000 | -0.278940000 |
| 1  | 2.227147000  | -2.165310000 | -2.045192000 |
| 1  | 1.908194000  | -2.287865000 | -0.311498000 |
| 6  | 2.738839000  | -0.417831000 | -0.898860000 |
| 6  | 4.101276000  | -0.433751000 | -1.190112000 |
| 1  | 4.537832000  | -1.308347000 | -1.661897000 |
| 6  | 2.895845000  | 1.712615000  | -0.025608000 |
| 1  | 2.377007000  | 2.549831000  | 0.427829000  |
| 6  | 4.878556000  | 0.672916000  | -0.869313000 |
| 1  | 5.942600000  | 0.682462000  | -1.083824000 |
| 6  | 4.260332000  | 1.769102000  | -0.272933000 |
| 1  | 4.818492000  | 2.659932000  | -0.006257000 |
| 7  | 2.138209000  | 0.644781000  | -0.326793000 |
| 16 | -2.075762000 | -0.516322000 | 0.154161000  |
| 6  | -3.580688000 | 0.482772000  | -0.295719000 |
| 6  | -3.889171000 | 1.302115000  | 0.961413000  |
| 6  | -4.740168000 | -0.467812000 | -0.605175000 |
| 1  | -3.042826000 | 1.937359000  | 1.241765000  |
| 1  | -4.749319000 | 1.952136000  | 0.764586000  |
| 1  | -4.137457000 | 0.656733000  | 1.810666000  |
| 1  | -4.578652000 | -1.014558000 | -1.539610000 |
| 1  | -4.895731000 | -1.192550000 | 0.201032000  |
| 1  | -5.661974000 | 0.114598000  | -0.719048000 |
| 6  | -3.321307000 | 1.414138000  | -1.477629000 |
| 1  | -4.246718000 | 1.953584000  | -1.714195000 |
| 1  | -2.541558000 | 2.141971000  | -1.243915000 |
| 1  | -3.015656000 | 0.865903000  | -2.374407000 |
| 6  | 0.854020000  | -1.464926000 | 2.432282000  |
| 6  | 1.198799000  | -2.335859000 | 3.545397000  |
| 1  | 2.177182000  | -2.790643000 | 3.371136000  |
| 1  | 1.232224000  | -1.757260000 | 4.471951000  |
| 1  | 0.448655000  | -3.124627000 | 3.642767000  |
| 7  | 0.578379000  | -0.770371000 | 1.547645000  |
| 1  | 0.367037000  | -0.745601000 | -2.241821000 |
| 1  | -0.216877000 | 1.350829000  | -1.357964000 |

**A7R<sub>X</sub>**=NCMe

Coordinates (Angstroms)

|    | X            | Y            | Z            |
|----|--------------|--------------|--------------|
| 25 | -0.752531000 | 0.571593000  | -0.467778000 |
| 1  | -0.124864000 | -0.947219000 | -0.553998000 |

|    |              |              |              |
|----|--------------|--------------|--------------|
| 7  | -0.371363000 | 0.472620000  | 1.643078000  |
| 1  | 0.135810000  | -0.403020000 | 1.762025000  |
| 6  | -0.928971000 | 0.510670000  | -2.197716000 |
| 8  | -1.013801000 | 0.407605000  | -3.374247000 |
| 6  | -2.536928000 | -0.632930000 | 1.902521000  |
| 6  | 0.530982000  | 1.566377000  | 2.003699000  |
| 6  | -1.582127000 | 0.406976000  | 2.469699000  |
| 1  | -3.447907000 | -0.676088000 | 2.503961000  |
| 1  | -2.064087000 | -1.619352000 | 1.903260000  |
| 1  | -1.347815000 | 0.153309000  | 3.512859000  |
| 1  | -2.053513000 | 1.395569000  | 2.464454000  |
| 1  | 1.062583000  | 1.379373000  | 2.945706000  |
| 1  | -0.067376000 | 2.474148000  | 2.143320000  |
| 6  | 1.513636000  | 1.811812000  | 0.886928000  |
| 6  | 2.724490000  | 2.461835000  | 1.116674000  |
| 1  | 2.990385000  | 2.751788000  | 2.128513000  |
| 6  | 1.964698000  | 1.656266000  | -1.369784000 |
| 1  | 1.631997000  | 1.305527000  | -2.340289000 |
| 6  | 3.568137000  | 2.728287000  | 0.046006000  |
| 1  | 4.514895000  | 3.236329000  | 0.200331000  |
| 6  | 3.178947000  | 2.311685000  | -1.224684000 |
| 1  | 3.804791000  | 2.480967000  | -2.094013000 |
| 7  | 1.131563000  | 1.414287000  | -0.343395000 |
| 16 | -2.932996000 | -0.153945000 | 0.182674000  |
| 6  | -3.653193000 | -1.709938000 | -0.540008000 |
| 6  | -4.166338000 | -1.291474000 | -1.921494000 |
| 6  | -4.816385000 | -2.179959000 | 0.337229000  |
| 1  | -3.354898000 | -0.909995000 | -2.548893000 |
| 1  | -4.601274000 | -2.163501000 | -2.423006000 |
| 1  | -4.941221000 | -0.520846000 | -1.847585000 |
| 1  | -4.471431000 | -2.534225000 | 1.314017000  |
| 1  | -5.551789000 | -1.383921000 | 0.494786000  |
| 1  | -5.323239000 | -3.017818000 | -0.156244000 |
| 6  | -2.608634000 | -2.813564000 | -0.682180000 |
| 1  | -3.089317000 | -3.708900000 | -1.095515000 |
| 1  | -1.801530000 | -2.508309000 | -1.351566000 |
| 1  | -2.166750000 | -3.087262000 | 0.280374000  |
| 6  | 1.591262000  | -2.556823000 | 1.250160000  |
| 8  | 1.344568000  | -1.979779000 | 2.305752000  |
| 6  | 2.708624000  | -2.082216000 | 0.376488000  |
| 6  | 2.918230000  | -2.613124000 | -0.901859000 |
| 6  | 3.571571000  | -1.090233000 | 0.857647000  |
| 6  | 3.974698000  | -2.157808000 | -1.686227000 |
| 1  | 2.253363000  | -3.373420000 | -1.297736000 |



|   |              |              |              |
|---|--------------|--------------|--------------|
| 6 | 4.633556000  | -0.644259000 | 0.078208000  |
| 1 | 3.404339000  | -0.678597000 | 1.847786000  |
| 6 | 4.836236000  | -1.176999000 | -1.195679000 |
| 1 | 4.125064000  | -2.569605000 | -2.679487000 |
| 1 | 5.301341000  | 0.121992000  | 0.459609000  |
| 1 | 5.662220000  | -0.824632000 | -1.806750000 |
| 6 | 0.804164000  | -3.769929000 | 0.836397000  |
| 1 | 0.059777000  | -3.997998000 | 1.600123000  |
| 1 | 0.301020000  | -3.589562000 | -0.118499000 |
| 1 | 1.471332000  | -4.628600000 | 0.704177000  |
| 6 | -1.892198000 | 3.516073000  | -0.047215000 |
| 6 | -2.423079000 | 4.860658000  | 0.119153000  |
| 1 | -1.744079000 | 5.455181000  | 0.735438000  |
| 1 | -2.533288000 | 5.338778000  | -0.857370000 |
| 1 | -3.399886000 | 4.812700000  | 0.606572000  |
| 7 | -1.475607000 | 2.444463000  | -0.185468000 |

A7S<sub>X=NCMe</sub>

Coordinates (Angstroms)

|    | X            | Y            | Z            |
|----|--------------|--------------|--------------|
| 25 | -0.974820000 | 0.655692000  | 0.477511000  |
| 1  | 0.286016000  | -0.290480000 | 0.944888000  |
| 7  | -0.699842000 | -0.137167000 | -1.503036000 |
| 1  | 0.040776000  | -0.826215000 | -1.395443000 |
| 6  | -1.146897000 | 1.183808000  | 2.127600000  |
| 8  | -1.235105000 | 1.507494000  | 3.263016000  |
| 6  | 0.935446000  | 1.619905000  | -1.924305000 |
| 6  | -1.915266000 | -0.859106000 | -1.880448000 |
| 6  | -0.253059000 | 0.853884000  | -2.486420000 |
| 1  | 1.276140000  | 2.370607000  | -2.641009000 |
| 1  | 1.758377000  | 0.929062000  | -1.716149000 |
| 1  | 0.037461000  | 0.380787000  | -3.434800000 |
| 1  | -1.086091000 | 1.534605000  | -2.692627000 |
| 1  | -1.745635000 | -1.568344000 | -2.699630000 |
| 1  | -2.655280000 | -0.126247000 | -2.221944000 |
| 6  | -2.461880000 | -1.577356000 | -0.673329000 |
| 6  | -3.210906000 | -2.746258000 | -0.789910000 |
| 1  | -3.380490000 | -3.176936000 | -1.771614000 |
| 6  | -2.687000000 | -1.600832000 | 1.623805000  |
| 1  | -2.444600000 | -1.119734000 | 2.565001000  |
| 6  | -3.719171000 | -3.346749000 | 0.355479000  |
| 1  | -4.303011000 | -4.259427000 | 0.288628000  |
| 6  | -3.452622000 | -2.757596000 | 1.589334000  |

|    |              |              |              |
|----|--------------|--------------|--------------|
| 1  | -3.822551000 | -3.186406000 | 2.514225000  |
| 7  | -2.194665000 | -1.011780000 | 0.520962000  |
| 16 | 0.416166000  | 2.418064000  | -0.362331000 |
| 6  | 2.035411000  | 2.788343000  | 0.478305000  |
| 6  | 1.647900000  | 3.561785000  | 1.742200000  |
| 6  | 2.885006000  | 3.667353000  | -0.443384000 |
| 1  | 1.009759000  | 2.958176000  | 2.394932000  |
| 1  | 2.556757000  | 3.820157000  | 2.297667000  |
| 1  | 1.121652000  | 4.492191000  | 1.502257000  |
| 1  | 3.205356000  | 3.125382000  | -1.339248000 |
| 1  | 2.343811000  | 4.566781000  | -0.755477000 |
| 1  | 3.788581000  | 3.982219000  | 0.092043000  |
| 6  | 2.796101000  | 1.518918000  | 0.853242000  |
| 1  | 3.741975000  | 1.798600000  | 1.333258000  |
| 1  | 2.219300000  | 0.901966000  | 1.544346000  |
| 1  | 3.037229000  | 0.909946000  | -0.022705000 |
| 6  | 1.126690000  | -2.911352000 | -0.288596000 |
| 8  | 0.548391000  | -2.896955000 | -1.370591000 |
| 6  | 2.501571000  | -2.329601000 | -0.172107000 |
| 6  | 3.185743000  | -2.287072000 | 1.047875000  |
| 6  | 3.114740000  | -1.812922000 | -1.320735000 |
| 6  | 4.465852000  | -1.742206000 | 1.116379000  |
| 1  | 2.723278000  | -2.672276000 | 1.950610000  |
| 6  | 4.394124000  | -1.271627000 | -1.252822000 |
| 1  | 2.578635000  | -1.841744000 | -2.264130000 |
| 6  | 5.072288000  | -1.236725000 | -0.033023000 |
| 1  | 4.986932000  | -1.708010000 | 2.068186000  |
| 1  | 4.861570000  | -0.871710000 | -2.147654000 |
| 1  | 6.068800000  | -0.808501000 | 0.022819000  |
| 6  | 0.475590000  | -3.524141000 | 0.920224000  |
| 1  | -0.526492000 | -3.864920000 | 0.654369000  |
| 1  | 1.067585000  | -4.372192000 | 1.282070000  |
| 1  | 0.408519000  | -2.790857000 | 1.728987000  |
| 6  | -3.437931000 | 2.336423000  | -0.640660000 |
| 6  | -4.576163000 | 3.110760000  | -1.112421000 |
| 1  | -5.305145000 | 2.447113000  | -1.584035000 |
| 1  | -5.049362000 | 3.621516000  | -0.270053000 |
| 1  | -4.242182000 | 3.853530000  | -1.841000000 |
| 7  | -2.534852000 | 1.720361000  | -0.258547000 |

-----  
**TSA7-8R<sub>X=NCMe</sub>**

-----  
Coordinates (Angstroms)

X

Y

Z  
-----

|    |              |              |              |
|----|--------------|--------------|--------------|
| 25 | -0.590830000 | 0.446239000  | -0.346444000 |
| 1  | -0.081163000 | -1.140008000 | 0.034833000  |
| 7  | -0.428535000 | 0.725191000  | 1.742107000  |
| 1  | 0.018486000  | -0.158579000 | 2.019676000  |
| 6  | -0.581775000 | -0.019253000 | -2.030809000 |
| 8  | -0.544520000 | -0.394054000 | -3.150582000 |
| 6  | -2.678046000 | -0.195954000 | 1.968511000  |
| 6  | 0.528640000  | 1.795751000  | 2.013947000  |
| 6  | -1.690470000 | 0.845059000  | 2.480067000  |
| 1  | -3.631400000 | -0.105299000 | 2.494226000  |
| 1  | -2.277709000 | -1.203875000 | 2.115034000  |
| 1  | -1.540676000 | 0.704088000  | 3.559274000  |
| 1  | -2.091351000 | 1.853558000  | 2.326665000  |
| 1  | 0.946161000  | 1.740784000  | 3.027918000  |
| 1  | 0.009373000  | 2.757570000  | 1.923853000  |
| 6  | 1.634462000  | 1.752536000  | 0.990031000  |
| 6  | 2.875838000  | 2.338335000  | 1.229369000  |
| 1  | 3.077039000  | 2.787619000  | 2.196795000  |
| 6  | 2.263792000  | 1.171741000  | -1.153434000 |
| 1  | 1.986487000  | 0.684465000  | -2.081009000 |
| 6  | 3.829299000  | 2.348211000  | 0.219053000  |
| 1  | 4.800547000  | 2.805507000  | 0.380077000  |
| 6  | 3.513360000  | 1.754269000  | -1.000062000 |
| 1  | 4.224085000  | 1.728476000  | -1.818621000 |
| 7  | 1.333107000  | 1.166133000  | -0.185184000 |
| 16 | -2.897789000 | 0.114746000  | 0.183109000  |
| 6  | -3.808149000 | -1.378961000 | -0.440641000 |
| 6  | -4.146303000 | -1.038404000 | -1.895501000 |
| 6  | -5.089972000 | -1.574044000 | 0.371639000  |
| 1  | -3.240084000 | -0.857546000 | -2.481724000 |
| 1  | -4.679892000 | -1.881786000 | -2.348172000 |
| 1  | -4.787835000 | -0.153285000 | -1.964066000 |
| 1  | -4.875414000 | -1.851693000 | 1.408646000  |
| 1  | -5.707490000 | -0.669539000 | 0.374905000  |
| 1  | -5.676574000 | -2.386113000 | -0.073787000 |
| 6  | -2.935862000 | -2.628161000 | -0.382416000 |
| 1  | -3.479595000 | -3.472555000 | -0.823291000 |
| 1  | -2.004039000 | -2.480766000 | -0.934008000 |
| 1  | -2.689003000 | -2.893370000 | 0.649136000  |
| 6  | 1.023515000  | -2.170102000 | 1.118447000  |
| 8  | 0.961899000  | -1.659720000 | 2.257217000  |
| 6  | 2.275046000  | -1.958385000 | 0.295728000  |
| 6  | 2.366191000  | -2.328736000 | -1.050623000 |
| 6  | 3.405038000  | -1.440584000 | 0.932903000  |

|   |              |              |              |
|---|--------------|--------------|--------------|
| 6 | 3.567450000  | -2.191280000 | -1.740892000 |
| 1 | 1.489613000  | -2.702295000 | -1.571212000 |
| 6 | 4.609895000  | -1.304514000 | 0.244942000  |
| 1 | 3.328203000  | -1.152911000 | 1.976679000  |
| 6 | 4.695906000  | -1.683483000 | -1.093608000 |
| 1 | 3.622894000  | -2.474454000 | -2.788292000 |
| 1 | 5.479959000  | -0.898331000 | 0.753147000  |
| 1 | 5.633057000  | -1.576366000 | -1.632384000 |
| 6 | 0.241737000  | -3.439290000 | 0.849535000  |
| 1 | -0.698918000 | -3.410310000 | 1.400536000  |
| 1 | 0.041518000  | -3.619154000 | -0.207193000 |
| 1 | 0.842847000  | -4.275717000 | 1.232072000  |
| 6 | -1.391636000 | 3.488192000  | -0.797088000 |
| 6 | -1.725509000 | 4.881833000  | -1.049162000 |
| 1 | -2.119727000 | 5.341486000  | -0.139685000 |
| 1 | -0.830241000 | 5.422011000  | -1.366841000 |
| 1 | -2.480359000 | 4.941433000  | -1.837197000 |
| 7 | -1.119877000 | 2.378186000  | -0.615114000 |

**TSA7-8S<sub>X</sub>=NCMe**

Coordinates (Angstroms)

|    | X            | Y            | Z            |
|----|--------------|--------------|--------------|
| 25 | -0.811797000 | 0.500765000  | 0.392422000  |
| 1  | 0.370515000  | -0.740109000 | 0.477140000  |
| 7  | -0.848948000 | -0.048040000 | -1.644858000 |
| 1  | -0.285979000 | -0.907585000 | -1.620718000 |
| 6  | -0.644131000 | 0.705943000  | 2.118959000  |
| 8  | -0.497053000 | 0.780646000  | 3.288711000  |
| 6  | 1.070817000  | 1.426053000  | -1.999979000 |
| 6  | -2.205741000 | -0.456500000 | -2.006879000 |
| 6  | -0.234384000 | 0.898115000  | -2.582100000 |
| 1  | 1.515578000  | 2.159921000  | -2.676607000 |
| 1  | 1.780210000  | 0.608589000  | -1.839391000 |
| 1  | -0.036168000 | 0.429346000  | -3.555712000 |
| 1  | -0.934674000 | 1.725086000  | -2.746021000 |
| 1  | -2.231288000 | -1.077514000 | -2.911804000 |
| 1  | -2.798571000 | 0.443884000  | -2.208966000 |
| 6  | -2.822443000 | -1.195423000 | -0.847185000 |
| 6  | -3.857217000 | -2.111488000 | -1.023705000 |
| 1  | -4.206745000 | -2.337084000 | -2.026173000 |
| 6  | -2.886330000 | -1.485691000 | 1.442631000  |
| 1  | -2.459035000 | -1.221357000 | 2.403677000  |
| 6  | -4.423497000 | -2.720698000 | 0.089452000  |

|    |              |              |              |
|----|--------------|--------------|--------------|
| 1  | -5.229619000 | -3.438843000 | -0.023706000 |
| 6  | -3.929089000 | -2.396324000 | 1.350756000  |
| 1  | -4.334697000 | -2.844047000 | 2.251339000  |
| 7  | -2.332874000 | -0.893363000 | 0.371565000  |
| 16 | 0.660400000  | 2.198863000  | -0.397373000 |
| 6  | 2.302161000  | 2.487979000  | 0.420086000  |
| 6  | 1.969925000  | 3.337137000  | 1.651357000  |
| 6  | 3.216282000  | 3.263084000  | -0.530202000 |
| 1  | 1.275101000  | 2.815789000  | 2.317275000  |
| 1  | 2.891923000  | 3.533649000  | 2.210243000  |
| 1  | 1.529175000  | 4.299965000  | 1.371811000  |
| 1  | 3.506004000  | 2.659100000  | -1.396150000 |
| 1  | 2.740786000  | 4.181941000  | -0.889189000 |
| 1  | 4.134180000  | 3.540276000  | 0.001473000  |
| 6  | 2.950388000  | 1.175958000  | 0.844673000  |
| 1  | 3.899546000  | 1.386510000  | 1.352592000  |
| 1  | 2.302237000  | 0.620747000  | 1.526866000  |
| 1  | 3.164441000  | 0.535699000  | -0.014764000 |
| 6  | 0.760118000  | -2.435049000 | -0.059680000 |
| 8  | 0.187796000  | -2.609195000 | -1.158374000 |
| 6  | 2.249261000  | -2.160895000 | -0.074019000 |
| 6  | 3.034397000  | -2.204064000 | 1.083025000  |
| 6  | 2.873116000  | -1.916461000 | -1.301929000 |
| 6  | 4.412072000  | -2.003718000 | 1.012971000  |
| 1  | 2.575520000  | -2.381382000 | 2.050249000  |
| 6  | 4.248554000  | -1.708788000 | -1.374158000 |
| 1  | 2.265332000  | -1.898705000 | -2.201287000 |
| 6  | 5.024462000  | -1.753203000 | -0.214763000 |
| 1  | 5.006333000  | -2.037810000 | 1.921780000  |
| 1  | 4.717538000  | -1.518528000 | -2.335569000 |
| 1  | 6.097590000  | -1.593986000 | -0.268734000 |
| 6  | 0.179816000  | -3.091609000 | 1.177390000  |
| 1  | -0.900928000 | -3.170843000 | 1.058401000  |
| 1  | 0.595533000  | -4.105755000 | 1.252331000  |
| 1  | 0.401557000  | -2.556308000 | 2.101907000  |
| 6  | -3.099570000 | 2.652082000  | -0.064658000 |
| 6  | -4.156068000 | 3.632305000  | -0.265345000 |
| 1  | -5.057568000 | 3.135479000  | -0.631899000 |
| 1  | -4.380093000 | 4.131663000  | 0.680574000  |
| 1  | -3.833362000 | 4.377139000  | -0.996739000 |
| 7  | -2.257493000 | 1.875696000  | 0.100478000  |

---

**A8R<sub>x</sub>**=NCMe

-----  
Coordinates (Angstroms)  
-----

|    | X            | Y            | Z            |
|----|--------------|--------------|--------------|
| 25 | -0.677938000 | 0.645830000  | -0.294812000 |
| 1  | 0.091018000  | -1.840413000 | 0.167929000  |
| 7  | -0.467759000 | 0.653345000  | 1.677745000  |
| 1  | 0.332125000  | -0.813587000 | 1.968867000  |
| 6  | -0.636373000 | 0.184717000  | -1.999163000 |
| 8  | -0.585681000 | -0.142241000 | -3.128870000 |
| 6  | -2.627768000 | -0.396468000 | 1.985440000  |
| 6  | 0.524636000  | 1.593669000  | 2.145456000  |
| 6  | -1.637890000 | 0.623076000  | 2.531569000  |
| 1  | -3.574747000 | -0.374230000 | 2.529581000  |
| 1  | -2.199248000 | -1.401650000 | 2.043800000  |
| 1  | -1.388412000 | 0.334770000  | 3.568519000  |
| 1  | -2.126869000 | 1.614700000  | 2.595357000  |
| 1  | 0.983613000  | 1.303362000  | 3.107403000  |
| 1  | 0.088624000  | 2.598605000  | 2.312144000  |
| 6  | 1.601749000  | 1.728852000  | 1.106006000  |
| 6  | 2.864756000  | 2.249506000  | 1.387886000  |
| 1  | 3.101745000  | 2.552186000  | 2.403031000  |
| 6  | 2.169736000  | 1.435612000  | -1.117683000 |
| 1  | 1.856256000  | 1.090301000  | -2.096529000 |
| 6  | 3.795981000  | 2.367580000  | 0.365993000  |
| 1  | 4.785102000  | 2.769350000  | 0.563052000  |
| 6  | 3.440210000  | 1.950359000  | -0.915998000 |
| 1  | 4.136720000  | 2.010057000  | -1.744878000 |
| 7  | 1.261167000  | 1.324132000  | -0.132746000 |
| 16 | -2.902944000 | 0.033819000  | 0.230136000  |
| 6  | -3.598517000 | -1.525153000 | -0.509097000 |
| 6  | -4.074075000 | -1.122072000 | -1.907793000 |
| 6  | -4.782507000 | -1.998228000 | 0.336989000  |
| 1  | -3.252380000 | -0.725273000 | -2.511485000 |
| 1  | -4.474125000 | -2.004506000 | -2.419700000 |
| 1  | -4.865950000 | -0.367371000 | -1.859522000 |
| 1  | -4.465478000 | -2.337487000 | 1.328020000  |
| 1  | -5.530846000 | -1.208443000 | 0.460841000  |
| 1  | -5.264462000 | -2.846209000 | -0.163561000 |
| 6  | -2.533884000 | -2.616172000 | -0.604015000 |
| 1  | -2.981359000 | -3.523186000 | -1.027992000 |
| 1  | -1.707416000 | -2.307212000 | -1.250082000 |
| 1  | -2.128438000 | -2.872906000 | 0.378784000  |
| 6  | 0.882970000  | -2.267718000 | 0.809099000  |
| 8  | 0.797986000  | -1.702368000 | 2.090252000  |
| 6  | 2.209255000  | -1.975055000 | 0.118524000  |

|   |              |              |              |
|---|--------------|--------------|--------------|
| 6 | 2.330659000  | -2.165213000 | -1.262897000 |
| 6 | 3.322063000  | -1.534879000 | 0.835959000  |
| 6 | 3.543148000  | -1.938577000 | -1.910801000 |
| 1 | 1.463883000  | -2.487230000 | -1.836563000 |
| 6 | 4.538600000  | -1.305245000 | 0.190782000  |
| 1 | 3.222107000  | -1.363714000 | 1.903244000  |
| 6 | 4.655594000  | -1.510901000 | -1.183157000 |
| 1 | 3.619652000  | -2.088778000 | -2.984278000 |
| 1 | 5.394972000  | -0.958162000 | 0.762835000  |
| 1 | 5.601278000  | -1.329117000 | -1.685885000 |
| 6 | 0.646067000  | -3.773909000 | 0.907863000  |
| 1 | -0.317437000 | -3.968813000 | 1.388939000  |
| 1 | 0.642419000  | -4.242350000 | -0.081740000 |
| 1 | 1.434499000  | -4.241957000 | 1.508489000  |
| 6 | -1.570515000 | 3.607888000  | -0.700542000 |
| 6 | -1.955633000 | 5.004134000  | -0.832695000 |
| 1 | -1.345287000 | 5.620112000  | -0.167660000 |
| 1 | -1.804702000 | 5.331866000  | -1.864176000 |
| 1 | -3.009178000 | 5.124094000  | -0.569183000 |
| 7 | -1.260570000 | 2.498006000  | -0.601696000 |

**A8S<sub>X=NCMe</sub>**

Coordinates (Angstroms)

|    | X            | Y            | Z            |
|----|--------------|--------------|--------------|
| 25 | 1.128627000  | 0.437949000  | -0.335397000 |
| 1  | -0.918795000 | -1.169404000 | -0.275932000 |
| 7  | 1.103459000  | -0.011167000 | 1.591171000  |
| 1  | -0.375423000 | -0.870137000 | 1.714394000  |
| 6  | 0.718325000  | 0.595315000  | -2.046058000 |
| 8  | 0.412358000  | 0.663781000  | -3.181028000 |
| 6  | 0.010087000  | 2.072824000  | 2.162937000  |
| 6  | 2.073627000  | -1.023098000 | 1.944759000  |
| 6  | 1.064120000  | 1.055383000  | 2.571053000  |
| 1  | 0.024763000  | 2.956321000  | 2.805306000  |
| 1  | -0.980987000 | 1.613255000  | 2.205992000  |
| 1  | 0.804647000  | 0.682797000  | 3.578139000  |
| 1  | 2.046963000  | 1.555923000  | 2.670187000  |
| 1  | 1.805295000  | -1.588238000 | 2.854609000  |
| 1  | 3.067847000  | -0.577834000 | 2.147995000  |
| 6  | 2.227185000  | -1.976594000 | 0.794813000  |
| 6  | 2.733659000  | -3.268437000 | 0.938038000  |
| 1  | 3.023769000  | -3.621906000 | 1.922414000  |
| 6  | 1.954334000  | -2.286482000 | -1.482177000 |

|    |              |              |              |
|----|--------------|--------------|--------------|
| 1  | 1.629671000  | -1.859738000 | -2.424597000 |
| 6  | 2.849774000  | -4.081734000 | -0.180923000 |
| 1  | 3.240197000  | -5.090739000 | -0.091467000 |
| 6  | 2.448407000  | -3.579893000 | -1.418500000 |
| 1  | 2.513331000  | -4.176523000 | -2.321619000 |
| 7  | 1.843152000  | -1.491992000 | -0.402826000 |
| 16 | 0.357859000  | 2.552730000  | 0.430574000  |
| 6  | -1.312896000 | 3.081028000  | -0.201098000 |
| 6  | -1.045444000 | 3.733059000  | -1.559863000 |
| 6  | -1.919549000 | 4.102207000  | 0.763538000  |
| 1  | -0.549538000 | 3.041697000  | -2.247406000 |
| 1  | -1.999725000 | 4.029024000  | -2.010146000 |
| 1  | -0.425411000 | 4.629904000  | -1.458753000 |
| 1  | -2.173892000 | 3.651172000  | 1.727412000  |
| 1  | -1.239208000 | 4.942033000  | 0.939531000  |
| 1  | -2.844391000 | 4.498830000  | 0.328715000  |
| 6  | -2.230190000 | 1.869857000  | -0.360345000 |
| 1  | -3.213618000 | 2.197300000  | -0.719159000 |
| 1  | -1.820712000 | 1.160305000  | -1.084093000 |
| 1  | -2.381449000 | 1.342211000  | 0.585726000  |
| 6  | -1.529170000 | -1.774160000 | 0.418000000  |
| 8  | -1.213670000 | -1.432027000 | 1.744146000  |
| 6  | -2.983202000 | -1.473825000 | 0.096249000  |
| 6  | -3.388949000 | -1.366805000 | -1.238927000 |
| 6  | -3.936285000 | -1.311424000 | 1.102877000  |
| 6  | -4.717801000 | -1.102860000 | -1.562841000 |
| 1  | -2.650968000 | -1.473962000 | -2.031523000 |
| 6  | -5.270138000 | -1.049640000 | 0.782823000  |
| 1  | -3.623249000 | -1.377983000 | 2.140119000  |
| 6  | -5.666132000 | -0.943762000 | -0.550184000 |
| 1  | -5.012035000 | -1.012076000 | -2.604927000 |
| 1  | -6.001224000 | -0.925208000 | 1.577276000  |
| 1  | -6.703016000 | -0.735608000 | -0.798243000 |
| 6  | -1.206826000 | -3.247599000 | 0.150350000  |
| 1  | -0.151428000 | -3.443317000 | 0.365201000  |
| 1  | -1.817556000 | -3.890507000 | 0.794795000  |
| 1  | -1.403821000 | -3.515103000 | -0.893593000 |
| 6  | 4.046407000  | 1.528714000  | -0.512858000 |
| 6  | 5.412106000  | 2.028307000  | -0.545668000 |
| 1  | 6.090437000  | 1.282707000  | -0.123695000 |
| 1  | 5.702900000  | 2.235386000  | -1.578527000 |
| 1  | 5.481280000  | 2.949591000  | 0.037911000  |
| 7  | 2.958495000  | 1.136173000  | -0.493661000 |

---



A1<sub>X=CCMe</sub>

---

Coordinates (Angstroms)

---

|    | X            | Y            | Z            |
|----|--------------|--------------|--------------|
| 25 | -0.188720000 | 0.053390000  | 0.097130000  |
| 7  | -0.481208000 | -1.656982000 | -0.697483000 |
| 6  | 0.083667000  | 0.579001000  | 1.724744000  |
| 8  | 0.208399000  | 0.872402000  | 2.871509000  |
| 6  | 1.885931000  | -2.190890000 | -0.701386000 |
| 6  | -1.823594000 | -2.149079000 | -0.856355000 |
| 6  | 0.514302000  | -2.536854000 | -1.273219000 |
| 1  | 2.696700000  | -2.643346000 | -1.279409000 |
| 1  | 1.941155000  | -2.532593000 | 0.335204000  |
| 1  | 0.311646000  | -3.598468000 | -1.042076000 |
| 1  | 0.541508000  | -2.462086000 | -2.377182000 |
| 1  | -1.976294000 | -3.136990000 | -0.379290000 |
| 1  | -2.101575000 | -2.291138000 | -1.918474000 |
| 6  | -2.787510000 | -1.171014000 | -0.245839000 |
| 6  | -4.165637000 | -1.391923000 | -0.202561000 |
| 1  | -4.573727000 | -2.303941000 | -0.627688000 |
| 6  | -3.034123000 | 0.862792000  | 0.828857000  |
| 1  | -2.536815000 | 1.743927000  | 1.220825000  |
| 6  | -4.989629000 | -0.442451000 | 0.384859000  |
| 1  | -6.063298000 | -0.596134000 | 0.434057000  |
| 6  | -4.408828000 | 0.711828000  | 0.913542000  |
| 1  | -5.008793000 | 1.483770000  | 1.383319000  |
| 7  | -2.229358000 | -0.057729000 | 0.264930000  |
| 16 | 2.006752000  | -0.370802000 | -0.711468000 |
| 6  | 3.485184000  | -0.009707000 | 0.354681000  |
| 6  | 3.444980000  | 1.506040000  | 0.565948000  |
| 6  | 4.755543000  | -0.412147000 | -0.398186000 |
| 1  | 2.540935000  | 1.800970000  | 1.106112000  |
| 1  | 4.319925000  | 1.815169000  | 1.149522000  |
| 1  | 3.466147000  | 2.045406000  | -0.387424000 |
| 1  | 4.777845000  | -1.487764000 | -0.603963000 |
| 1  | 4.843337000  | 0.123790000  | -1.348680000 |
| 1  | 5.635599000  | -0.172403000 | 0.211488000  |
| 6  | 3.410764000  | -0.732949000 | 1.699309000  |
| 1  | 4.203664000  | -0.353362000 | 2.355059000  |
| 1  | 2.448917000  | -0.563882000 | 2.190494000  |
| 1  | 3.565057000  | -1.810911000 | 1.591621000  |
| 6  | -0.326495000 | 2.980965000  | -1.261354000 |
| 6  | -0.424058000 | 4.284144000  | -1.940330000 |
| 1  | -1.204831000 | 4.285764000  | -2.711023000 |

|   |              |             |              |
|---|--------------|-------------|--------------|
| 1 | -0.664407000 | 5.092973000 | -1.238964000 |
| 1 | 0.515863000  | 4.558008000 | -2.435538000 |
| 6 | -0.247464000 | 1.883090000 | -0.695535000 |

---

**A2<sub>X=CCMe</sub>**

---

Coordinates (Angstroms)

|    | X            | Y            | Z            |
|----|--------------|--------------|--------------|
| 25 | -0.192676000 | 0.085584000  | 0.058554000  |
| 7  | -0.501730000 | -1.601990000 | -0.779493000 |
| 6  | 0.065346000  | 0.390770000  | 1.736742000  |
| 8  | 0.171797000  | 0.495403000  | 2.918639000  |
| 6  | 1.854920000  | -2.176593000 | -0.710935000 |
| 6  | -1.844786000 | -2.092773000 | -0.916737000 |
| 6  | 0.488738000  | -2.522054000 | -1.296669000 |
| 1  | 2.670900000  | -2.653667000 | -1.261592000 |
| 1  | 1.887509000  | -2.489866000 | 0.335262000  |
| 1  | 0.262137000  | -3.568882000 | -1.020545000 |
| 1  | 0.538453000  | -2.500641000 | -2.401939000 |
| 1  | -1.997516000 | -3.061412000 | -0.398190000 |
| 1  | -2.129154000 | -2.278881000 | -1.969769000 |
| 6  | -2.804301000 | -1.094015000 | -0.334064000 |
| 6  | -4.186991000 | -1.288927000 | -0.328437000 |
| 1  | -4.600274000 | -2.191797000 | -0.767855000 |
| 6  | -3.040796000 | 0.941227000  | 0.739707000  |
| 1  | -2.537466000 | 1.813228000  | 1.143349000  |
| 6  | -5.008270000 | -0.325591000 | 0.239581000  |
| 1  | -6.085739000 | -0.458325000 | 0.257325000  |
| 6  | -4.419872000 | 0.815603000  | 0.787890000  |
| 1  | -5.017593000 | 1.597813000  | 1.243273000  |
| 7  | -2.238898000 | 0.008071000  | 0.193121000  |
| 16 | 1.997616000  | -0.359938000 | -0.761032000 |
| 6  | 3.492716000  | 0.001385000  | 0.284487000  |
| 6  | 3.459613000  | 1.515717000  | 0.507207000  |
| 6  | 4.750480000  | -0.395912000 | -0.492436000 |
| 1  | 2.580452000  | 1.809428000  | 1.087505000  |
| 1  | 4.358434000  | 1.820204000  | 1.055967000  |
| 1  | 3.441212000  | 2.062385000  | -0.441974000 |
| 1  | 4.766486000  | -1.469145000 | -0.710695000 |
| 1  | 4.825034000  | 0.150732000  | -1.437959000 |
| 1  | 5.640405000  | -0.165284000 | 0.106348000  |
| 6  | 3.444084000  | -0.729270000 | 1.626481000  |
| 1  | 4.250435000  | -0.352483000 | 2.267297000  |
| 1  | 2.493396000  | -0.561929000 | 2.139144000  |

|   |              |              |              |
|---|--------------|--------------|--------------|
| 1 | 3.596414000  | -1.806638000 | 1.510857000  |
| 6 | -0.213658000 | 3.145120000  | -1.014660000 |
| 6 | -0.243436000 | 4.515100000  | -1.554169000 |
| 1 | -1.002253000 | 4.629003000  | -2.338417000 |
| 1 | -0.472478000 | 5.255176000  | -0.777186000 |
| 1 | 0.719397000  | 4.800957000  | -1.995566000 |
| 1 | -0.662867000 | -3.132245000 | 2.036910000  |
| 1 | -0.509774000 | -2.593533000 | 1.537201000  |
| 6 | -0.185530000 | 1.993449000  | -0.562422000 |

---

**A3<sub>X=CCMe</sub>**

---

Coordinates (Angstroms)

|    | X            | Y            | Z            |
|----|--------------|--------------|--------------|
| 25 | 1.202625000  | 0.655046000  | 0.434641000  |
| 1  | 0.751549000  | -0.557182000 | 1.586860000  |
| 7  | 0.122470000  | -0.084109000 | -1.210465000 |
| 6  | 2.041927000  | 1.317088000  | 1.819848000  |
| 8  | 2.609127000  | 1.824179000  | 2.723710000  |
| 6  | 2.070019000  | -1.356872000 | -1.900219000 |
| 6  | -0.886287000 | 0.885552000  | -1.565597000 |
| 6  | 0.937464000  | -0.441813000 | -2.349543000 |
| 1  | 2.734828000  | -1.614390000 | -2.728885000 |
| 1  | 1.652751000  | -2.274866000 | -1.476334000 |
| 1  | 0.359626000  | -0.984892000 | -3.122888000 |
| 1  | 1.361977000  | 0.450504000  | -2.847884000 |
| 1  | -1.694906000 | 0.469559000  | -2.193777000 |
| 1  | -0.454738000 | 1.731472000  | -2.134803000 |
| 6  | -1.485825000 | 1.456840000  | -0.311573000 |
| 6  | -2.778259000 | 1.978710000  | -0.260450000 |
| 1  | -3.397175000 | 1.953196000  | -1.151800000 |
| 6  | -1.153317000 | 1.953980000  | 1.921487000  |
| 1  | -0.471868000 | 1.926343000  | 2.765538000  |
| 6  | -3.259363000 | 2.502026000  | 0.931524000  |
| 1  | -4.265192000 | 2.906411000  | 0.992662000  |
| 6  | -2.428888000 | 2.484687000  | 2.051111000  |
| 1  | -2.757595000 | 2.874878000  | 3.008267000  |
| 7  | -0.679883000 | 1.452416000  | 0.769149000  |
| 16 | 3.013153000  | -0.482450000 | -0.596118000 |
| 6  | 3.837754000  | -1.875282000 | 0.321950000  |
| 6  | 4.801827000  | -1.187836000 | 1.293492000  |
| 6  | 4.618076000  | -2.737664000 | -0.674425000 |
| 1  | 4.264997000  | -0.523422000 | 1.978323000  |
| 1  | 5.319265000  | -1.946777000 | 1.891923000  |

|   |              |              |              |
|---|--------------|--------------|--------------|
| 1 | 5.558262000  | -0.600286000 | 0.762366000  |
| 1 | 3.950558000  | -3.302885000 | -1.332648000 |
| 1 | 5.284226000  | -2.129759000 | -1.295788000 |
| 1 | 5.231153000  | -3.461601000 | -0.124534000 |
| 6 | 2.842076000  | -2.732271000 | 1.103570000  |
| 1 | 3.371449000  | -3.585638000 | 1.544761000  |
| 1 | 2.381579000  | -2.164206000 | 1.915512000  |
| 1 | 2.045287000  | -3.129569000 | 0.466825000  |
| 1 | 0.640215000  | -0.927127000 | 0.891141000  |
| 1 | -1.517020000 | -1.422314000 | 1.278478000  |
| 1 | -0.559634000 | -1.366099000 | -0.786086000 |
| 6 | -1.906582000 | -2.132351000 | 0.527092000  |
| 8 | -0.984370000 | -2.302789000 | -0.505417000 |
| 6 | -3.242631000 | -1.559024000 | 0.055812000  |
| 6 | -4.173553000 | -1.089224000 | 0.990665000  |
| 6 | -3.561896000 | -1.482765000 | -1.300407000 |
| 6 | -5.392117000 | -0.553907000 | 0.580270000  |
| 1 | -3.933535000 | -1.127465000 | 2.051537000  |
| 6 | -4.780581000 | -0.943701000 | -1.718118000 |
| 1 | -2.834940000 | -1.834088000 | -2.026280000 |
| 6 | -5.700329000 | -0.476801000 | -0.780157000 |
| 1 | -6.098526000 | -0.186418000 | 1.319860000  |
| 1 | -5.007418000 | -0.881961000 | -2.779304000 |
| 1 | -6.646030000 | -0.051497000 | -1.104249000 |
| 6 | -2.116701000 | -3.478465000 | 1.223105000  |
| 1 | -1.164441000 | -3.841634000 | 1.623848000  |
| 1 | -2.833801000 | -3.400441000 | 2.047247000  |
| 1 | -2.494383000 | -4.215590000 | 0.504759000  |
| 6 | 1.716712000  | 2.296527000  | -0.606658000 |
| 6 | 2.024436000  | 3.324760000  | -1.218378000 |
| 6 | 2.379241000  | 4.542721000  | -1.966244000 |
| 1 | 3.454236000  | 4.592751000  | -2.179055000 |
| 1 | 1.857138000  | 4.596953000  | -2.929868000 |
| 1 | 2.120656000  | 5.452333000  | -1.409925000 |

**TSA3-4<sub>x=CCMe</sub>**

| Coordinates (Angstroms) |             |              |              |
|-------------------------|-------------|--------------|--------------|
|                         | X           | Y            | Z            |
| 25                      | 1.202598000 | 0.656537000  | 0.432287000  |
| 1                       | 0.754593000 | -0.545233000 | 1.593210000  |
| 7                       | 0.115059000 | -0.091992000 | -1.207819000 |
| 6                       | 2.047423000 | 1.328060000  | 1.810307000  |
| 8                       | 2.617817000 | 1.839151000  | 2.709032000  |

|    |              |              |              |
|----|--------------|--------------|--------------|
| 6  | 2.062236000  | -1.370223000 | -1.891510000 |
| 6  | -0.895424000 | 0.879768000  | -1.563570000 |
| 6  | 0.932520000  | -0.455330000 | -2.347204000 |
| 1  | 2.724122000  | -1.635692000 | -2.719878000 |
| 1  | 1.641179000  | -2.283152000 | -1.460662000 |
| 1  | 0.352569000  | -0.998889000 | -3.117027000 |
| 1  | 1.355212000  | 0.437046000  | -2.841822000 |
| 1  | -1.704154000 | 0.459495000  | -2.186725000 |
| 1  | -0.459424000 | 1.718096000  | -2.136097000 |
| 6  | -1.489353000 | 1.455923000  | -0.309022000 |
| 6  | -2.782548000 | 1.975043000  | -0.255069000 |
| 1  | -3.405644000 | 1.943239000  | -1.143277000 |
| 6  | -1.147907000 | 1.963111000  | 1.920105000  |
| 1  | -0.463104000 | 1.939813000  | 2.761523000  |
| 6  | -3.259147000 | 2.503220000  | 0.936610000  |
| 1  | -4.265510000 | 2.905797000  | 1.000361000  |
| 6  | -2.423667000 | 2.492687000  | 2.052453000  |
| 1  | -2.748888000 | 2.886737000  | 3.009184000  |
| 7  | -0.678757000 | 1.457068000  | 0.768019000  |
| 16 | 3.010856000  | -0.489898000 | -0.595431000 |
| 6  | 3.834036000  | -1.879169000 | 0.329374000  |
| 6  | 4.800600000  | -1.187400000 | 1.295386000  |
| 6  | 4.611412000  | -2.747931000 | -0.663744000 |
| 1  | 4.265839000  | -0.518356000 | 1.977303000  |
| 1  | 5.317790000  | -1.943643000 | 1.897382000  |
| 1  | 5.557109000  | -0.603963000 | 0.759859000  |
| 1  | 3.942059000  | -3.315263000 | -1.318272000 |
| 1  | 5.277879000  | -2.144233000 | -1.288844000 |
| 1  | 5.223881000  | -3.470087000 | -0.110890000 |
| 6  | 2.838180000  | -2.730166000 | 1.117270000  |
| 1  | 3.366774000  | -3.582899000 | 1.560561000  |
| 1  | 2.381701000  | -2.157480000 | 1.928219000  |
| 1  | 2.038432000  | -3.128070000 | 0.484671000  |
| 1  | 0.643161000  | -0.923085000 | 0.901180000  |
| 1  | -1.516891000 | -1.390305000 | 1.276356000  |
| 1  | -0.520801000 | -1.270860000 | -0.806407000 |
| 6  | -1.890841000 | -2.106399000 | 0.519850000  |
| 8  | -0.972677000 | -2.256753000 | -0.511188000 |
| 6  | -3.240379000 | -1.552914000 | 0.057498000  |
| 6  | -4.172227000 | -1.089180000 | 0.994593000  |
| 6  | -3.569420000 | -1.488372000 | -1.297044000 |
| 6  | -5.399632000 | -0.570699000 | 0.588479000  |
| 1  | -3.925483000 | -1.117492000 | 2.054369000  |
| 6  | -4.797207000 | -0.967290000 | -1.711109000 |

|   |              |              |              |
|---|--------------|--------------|--------------|
| 1 | -2.840431000 | -1.834566000 | -2.023454000 |
| 6 | -5.717164000 | -0.505598000 | -0.770563000 |
| 1 | -6.106042000 | -0.207001000 | 1.330046000  |
| 1 | -5.031297000 | -0.915202000 | -2.771338000 |
| 1 | -6.669934000 | -0.093665000 | -1.091402000 |
| 6 | -2.085630000 | -3.453539000 | 1.223242000  |
| 1 | -1.127436000 | -3.804547000 | 1.621290000  |
| 1 | -2.800982000 | -3.383574000 | 2.050294000  |
| 1 | -2.455971000 | -4.197174000 | 0.507504000  |
| 6 | 1.715583000  | 2.291332000  | -0.622076000 |
| 6 | 2.024956000  | 3.315377000  | -1.239703000 |
| 6 | 2.385310000  | 4.530402000  | -1.989657000 |
| 1 | 3.141685000  | 4.325886000  | -2.757393000 |
| 1 | 1.517866000  | 4.966754000  | -2.500390000 |
| 1 | 2.795994000  | 5.307509000  | -1.333227000 |

A4<sub>X=CCMe</sub>

| Coordinates (Angstroms) |              |              |              |
|-------------------------|--------------|--------------|--------------|
|                         | X            | Y            | Z            |
| 25                      | 1.121468000  | 0.683255000  | 0.444140000  |
| 1                       | 0.578074000  | -0.599271000 | 1.459310000  |
| 7                       | 0.134987000  | 0.095085000  | -1.343308000 |
| 6                       | 1.874655000  | 1.213187000  | 1.932905000  |
| 8                       | 2.374969000  | 1.625175000  | 2.917123000  |
| 6                       | 2.101567000  | -1.178936000 | -1.961450000 |
| 6                       | -0.885704000 | 1.082894000  | -1.664347000 |
| 6                       | 1.037880000  | -0.207002000 | -2.450171000 |
| 1                       | 2.808467000  | -1.418485000 | -2.758902000 |
| 1                       | 1.617095000  | -2.095272000 | -1.611319000 |
| 1                       | 0.503310000  | -0.669095000 | -3.294493000 |
| 1                       | 1.495208000  | 0.722222000  | -2.809648000 |
| 1                       | -1.649890000 | 0.694730000  | -2.352575000 |
| 1                       | -0.407980000 | 1.944525000  | -2.146945000 |
| 6                       | -1.533575000 | 1.551600000  | -0.389824000 |
| 6                       | -2.827892000 | 2.066032000  | -0.363264000 |
| 1                       | -3.401161000 | 2.112552000  | -1.283341000 |
| 6                       | -1.310358000 | 1.866766000  | 1.886768000  |
| 1                       | -0.674038000 | 1.767697000  | 2.759677000  |
| 6                       | -3.366086000 | 2.497048000  | 0.841713000  |
| 1                       | -4.374120000 | 2.897547000  | 0.885149000  |
| 6                       | -2.590943000 | 2.389946000  | 1.994255000  |
| 1                       | -2.966344000 | 2.703359000  | 2.962239000  |
| 7                       | -0.779276000 | 1.458947000  | 0.723082000  |

|    |              |              |              |
|----|--------------|--------------|--------------|
| 16 | 2.984650000  | -0.411621000 | -0.551519000 |
| 6  | 3.686726000  | -1.896824000 | 0.327370000  |
| 6  | 4.651498000  | -1.318500000 | 1.366969000  |
| 6  | 4.454582000  | -2.757189000 | -0.680328000 |
| 1  | 4.135666000  | -0.635712000 | 2.050108000  |
| 1  | 5.074223000  | -2.136221000 | 1.962159000  |
| 1  | 5.478738000  | -0.778611000 | 0.893905000  |
| 1  | 3.782141000  | -3.255325000 | -1.385655000 |
| 1  | 5.178157000  | -2.163594000 | -1.249104000 |
| 1  | 5.003950000  | -3.538573000 | -0.141984000 |
| 6  | 2.601487000  | -2.721506000 | 1.021148000  |
| 1  | 3.038988000  | -3.663680000 | 1.373776000  |
| 1  | 2.202162000  | -2.190592000 | 1.889363000  |
| 1  | 1.761283000  | -2.955512000 | 0.357935000  |
| 1  | 0.495144000  | -0.939781000 | 0.742952000  |
| 1  | -1.377471000 | -1.883606000 | 1.382435000  |
| 1  | -0.327068000 | -0.818469000 | -1.061468000 |
| 6  | -1.692289000 | -2.383466000 | 0.430637000  |
| 8  | -0.733358000 | -2.312102000 | -0.532723000 |
| 6  | -3.011134000 | -1.688159000 | 0.051025000  |
| 6  | -3.919954000 | -1.263896000 | 1.027882000  |
| 6  | -3.340791000 | -1.483659000 | -1.290942000 |
| 6  | -5.128997000 | -0.664752000 | 0.676167000  |
| 1  | -3.672818000 | -1.397460000 | 2.079983000  |
| 6  | -4.549037000 | -0.885546000 | -1.652270000 |
| 1  | -2.619430000 | -1.791498000 | -2.043118000 |
| 6  | -5.450734000 | -0.474937000 | -0.669542000 |
| 1  | -5.816726000 | -0.334983000 | 1.450757000  |
| 1  | -4.783812000 | -0.731146000 | -2.702672000 |
| 1  | -6.388617000 | -0.001405000 | -0.946703000 |
| 6  | -2.009714000 | -3.845542000 | 0.818733000  |
| 1  | -1.087927000 | -4.339349000 | 1.147461000  |
| 1  | -2.750376000 | -3.919041000 | 1.626245000  |
| 1  | -2.394747000 | -4.385222000 | -0.056067000 |
| 6  | 1.700483000  | 2.388684000  | -0.442051000 |
| 6  | 2.029967000  | 3.451678000  | -0.976645000 |
| 6  | 2.409405000  | 4.715956000  | -1.628672000 |
| 1  | 2.953246000  | 4.544177000  | -2.565688000 |
| 1  | 1.530525000  | 5.324972000  | -1.874471000 |
| 1  | 3.055918000  | 5.328609000  | -0.988503000 |

TSA4-5<sub>X=CCMe</sub>

Coordinates (Angstroms)

|    | X            | Y            | Z            |
|----|--------------|--------------|--------------|
| 25 | 1.089603000  | 0.659651000  | 0.460336000  |
| 1  | 0.540599000  | -0.808113000 | 1.240536000  |
| 7  | 0.085182000  | 0.144150000  | -1.355756000 |
| 6  | 1.834917000  | 1.051080000  | 1.986407000  |
| 8  | 2.342507000  | 1.328393000  | 3.018678000  |
| 6  | 2.028685000  | -1.159106000 | -2.003790000 |
| 6  | -0.911559000 | 1.169612000  | -1.637166000 |
| 6  | 0.967376000  | -0.174708000 | -2.476008000 |
| 1  | 2.713282000  | -1.407527000 | -2.818110000 |
| 1  | 1.547751000  | -2.074390000 | -1.644602000 |
| 1  | 0.415285000  | -0.622442000 | -3.315895000 |
| 1  | 1.432345000  | 0.750528000  | -2.833918000 |
| 1  | -1.674757000 | 0.837041000  | -2.354017000 |
| 1  | -0.401834000 | 2.040527000  | -2.065103000 |
| 6  | -1.561691000 | 1.577895000  | -0.342501000 |
| 6  | -2.857818000 | 2.085468000  | -0.295184000 |
| 1  | -3.429844000 | 2.171902000  | -1.213319000 |
| 6  | -1.341800000 | 1.786785000  | 1.945221000  |
| 1  | -0.706276000 | 1.647201000  | 2.813183000  |
| 6  | -3.399927000 | 2.457347000  | 0.927919000  |
| 1  | -4.409887000 | 2.850833000  | 0.988618000  |
| 6  | -2.624830000 | 2.300080000  | 2.074640000  |
| 1  | -3.002425000 | 2.566209000  | 3.055916000  |
| 7  | -0.807035000 | 1.432596000  | 0.765480000  |
| 16 | 2.945360000  | -0.389788000 | -0.618646000 |
| 6  | 3.760520000  | -1.854961000 | 0.191508000  |
| 6  | 4.733908000  | -1.245981000 | 1.205601000  |
| 6  | 4.531897000  | -2.650926000 | -0.864881000 |
| 1  | 4.208935000  | -0.615221000 | 1.930286000  |
| 1  | 5.233086000  | -2.052004000 | 1.756163000  |
| 1  | 5.504275000  | -0.642782000 | 0.713329000  |
| 1  | 3.858660000  | -3.167567000 | -1.556238000 |
| 1  | 5.201515000  | -2.008820000 | -1.446929000 |
| 1  | 5.140509000  | -3.414658000 | -0.366250000 |
| 6  | 2.755510000  | -2.754330000 | 0.908349000  |
| 1  | 3.275628000  | -3.643710000 | 1.285430000  |
| 1  | 2.298148000  | -2.236405000 | 1.755010000  |
| 1  | 1.947075000  | -3.083395000 | 0.248749000  |
| 1  | 0.135908000  | -1.321967000 | 0.617470000  |
| 1  | -1.629741000 | -1.741053000 | 1.676870000  |
| 1  | -0.393119000 | -0.726047000 | -1.065212000 |
| 6  | -1.790035000 | -2.288258000 | 0.719145000  |
| 8  | -0.664928000 | -2.205391000 | -0.072122000 |



|   |              |              |              |
|---|--------------|--------------|--------------|
| 6 | -3.028352000 | -1.652061000 | 0.082040000  |
| 6 | -4.105200000 | -1.232438000 | 0.871934000  |
| 6 | -3.123017000 | -1.498250000 | -1.303100000 |
| 6 | -5.246634000 | -0.677134000 | 0.296054000  |
| 1 | -4.041726000 | -1.331695000 | 1.954159000  |
| 6 | -4.262001000 | -0.942117000 | -1.887195000 |
| 1 | -2.283156000 | -1.808658000 | -1.918637000 |
| 6 | -5.330123000 | -0.529838000 | -1.089970000 |
| 1 | -6.066654000 | -0.348378000 | 0.929193000  |
| 1 | -4.313761000 | -0.824011000 | -2.966617000 |
| 1 | -6.214823000 | -0.090112000 | -1.541982000 |
| 6 | -2.100748000 | -3.747970000 | 1.093285000  |
| 1 | -1.234845000 | -4.185495000 | 1.602042000  |
| 1 | -2.971592000 | -3.830003000 | 1.755467000  |
| 1 | -2.298404000 | -4.332070000 | 0.185907000  |
| 6 | 1.690956000  | 2.400822000  | -0.363956000 |
| 6 | 2.058561000  | 3.475947000  | -0.851932000 |
| 6 | 2.494804000  | 4.748583000  | -1.452073000 |
| 1 | 2.723917000  | 4.637385000  | -2.519327000 |
| 1 | 1.723824000  | 5.524820000  | -1.369780000 |
| 1 | 3.398211000  | 5.140915000  | -0.969069000 |

**A5<sub>X=CCMe</sub>**

| Coordinates (Angstroms) |              |              |              |
|-------------------------|--------------|--------------|--------------|
|                         | X            | Y            | Z            |
| 25                      | 0.922215000  | 0.651257000  | 0.480633000  |
| 1                       | -0.015973000 | -0.755629000 | 0.784455000  |
| 7                       | 0.422932000  | 0.427976000  | -1.628697000 |
| 1                       | -0.233548000 | -0.350568000 | -1.678019000 |
| 6                       | 1.227187000  | 0.885277000  | 2.173047000  |
| 8                       | 1.424838000  | 1.084343000  | 3.327279000  |
| 6                       | 2.344720000  | -1.068119000 | -1.865434000 |
| 6                       | -0.279195000 | 1.643176000  | -2.038335000 |
| 6                       | 1.576645000  | 0.098737000  | -2.470870000 |
| 1                       | 3.217119000  | -1.301964000 | -2.480982000 |
| 1                       | 1.700301000  | -1.950731000 | -1.815666000 |
| 1                       | 1.271382000  | -0.166560000 | -3.493777000 |
| 1                       | 2.215868000  | 0.985256000  | -2.529299000 |
| 1                       | -0.850661000 | 1.509927000  | -2.966977000 |
| 1                       | 0.472377000  | 2.420380000  | -2.213825000 |
| 6                       | -1.184792000 | 2.104906000  | -0.926879000 |
| 6                       | -2.316183000 | 2.878254000  | -1.177570000 |
| 1                       | -2.576038000 | 3.126048000  | -2.202201000 |

|    |              |              |              |
|----|--------------|--------------|--------------|
| 6  | -1.584394000 | 2.161878000  | 1.343461000  |
| 1  | -1.263635000 | 1.843062000  | 2.329353000  |
| 6  | -3.094184000 | 3.314525000  | -0.111662000 |
| 1  | -3.981082000 | 3.916668000  | -0.283229000 |
| 6  | -2.721023000 | 2.940992000  | 1.176925000  |
| 1  | -3.299564000 | 3.239423000  | 2.044611000  |
| 7  | -0.814303000 | 1.753912000  | 0.321136000  |
| 16 | 2.870161000  | -0.611929000 | -0.172434000 |
| 6  | 3.239333000  | -2.264199000 | 0.601881000  |
| 6  | 3.744263000  | -1.916908000 | 2.005919000  |
| 6  | 4.342151000  | -2.957171000 | -0.203372000 |
| 1  | 2.975181000  | -1.388798000 | 2.578792000  |
| 1  | 3.996521000  | -2.840111000 | 2.540652000  |
| 1  | 4.641910000  | -1.289673000 | 1.970639000  |
| 1  | 3.995576000  | -3.241772000 | -1.202515000 |
| 1  | 5.223267000  | -2.316125000 | -0.312443000 |
| 1  | 4.649585000  | -3.874703000 | 0.312989000  |
| 6  | 2.012468000  | -3.168557000 | 0.707066000  |
| 1  | 2.309772000  | -4.115218000 | 1.175287000  |
| 1  | 1.234432000  | -2.706588000 | 1.318899000  |
| 1  | 1.578240000  | -3.398977000 | -0.269727000 |
| 1  | -1.525696000 | -3.490061000 | 0.422461000  |
| 1  | -0.381090000 | -1.655956000 | -0.291957000 |
| 6  | -1.858221000 | -2.923798000 | -0.461714000 |
| 8  | -0.759131000 | -2.233807000 | -1.018919000 |
| 6  | -2.965944000 | -1.980333000 | -0.014589000 |
| 6  | -3.699753000 | -2.256941000 | 1.141544000  |
| 6  | -3.296732000 | -0.850325000 | -0.768841000 |
| 6  | -4.749185000 | -1.427111000 | 1.537436000  |
| 1  | -3.441069000 | -3.125591000 | 1.743452000  |
| 6  | -4.348588000 | -0.022870000 | -0.380456000 |
| 1  | -2.720416000 | -0.614470000 | -1.659673000 |
| 6  | -5.078446000 | -0.307242000 | 0.774812000  |
| 1  | -5.302139000 | -1.650855000 | 2.445633000  |
| 1  | -4.593390000 | 0.852556000  | -0.974477000 |
| 1  | -5.890319000 | 0.345855000  | 1.082207000  |
| 6  | -2.368517000 | -3.912961000 | -1.503238000 |
| 1  | -1.573206000 | -4.611497000 | -1.782421000 |
| 1  | -3.214208000 | -4.485896000 | -1.109941000 |
| 1  | -2.698693000 | -3.380787000 | -2.402490000 |
| 6  | 1.991379000  | 2.312251000  | -0.007328000 |
| 6  | 2.629241000  | 3.343524000  | -0.258343000 |
| 6  | 3.389618000  | 4.569074000  | -0.560250000 |
| 1  | 4.406218000  | 4.529896000  | -0.149138000 |

|   |             |             |              |
|---|-------------|-------------|--------------|
| 1 | 3.487999000 | 4.736922000 | -1.640358000 |
| 1 | 2.909889000 | 5.462114000 | -0.140420000 |

**TSA2-6<sub>X=CCMe</sub>**

| Coordinates (Angstroms) |              |              |              |
|-------------------------|--------------|--------------|--------------|
|                         | X            | Y            | Z            |
| 25                      | -0.101725000 | -0.380553000 | 0.096632000  |
| 7                       | -0.441554000 | 1.042676000  | -1.467478000 |
| 6                       | 0.190724000  | -1.776676000 | 1.098823000  |
| 8                       | 0.389630000  | -2.742792000 | 1.755688000  |
| 6                       | 1.935313000  | 1.560701000  | -1.441831000 |
| 6                       | -1.808978000 | 1.477427000  | -1.401397000 |
| 6                       | 0.517372000  | 2.113538000  | -1.524899000 |
| 1                       | 2.671214000  | 2.368431000  | -1.442651000 |
| 1                       | 2.129449000  | 0.903400000  | -2.295059000 |
| 1                       | 0.442721000  | 2.695826000  | -2.462367000 |
| 1                       | 0.360488000  | 2.834762000  | -0.697140000 |
| 1                       | -2.181615000 | 1.914508000  | -2.345340000 |
| 1                       | -1.935939000 | 2.264436000  | -0.628585000 |
| 6                       | -2.700689000 | 0.328818000  | -1.007132000 |
| 6                       | -4.054556000 | 0.287270000  | -1.340933000 |
| 1                       | -4.480775000 | 1.087439000  | -1.938146000 |
| 6                       | -2.878377000 | -1.670530000 | 0.137779000  |
| 1                       | -2.369791000 | -2.432680000 | 0.718043000  |
| 6                       | -4.836409000 | -0.773992000 | -0.901794000 |
| 1                       | -5.892962000 | -0.822718000 | -1.147094000 |
| 6                       | -4.233300000 | -1.775579000 | -0.143769000 |
| 1                       | -4.795310000 | -2.627602000 | 0.223018000  |
| 7                       | -2.118118000 | -0.644370000 | -0.278094000 |
| 16                      | 2.077535000  | 0.587573000  | 0.102028000  |
| 6                       | 3.542093000  | -0.507989000 | -0.237688000 |
| 6                       | 3.833065000  | -1.189941000 | 1.103283000  |
| 6                       | 4.736375000  | 0.351942000  | -0.658672000 |
| 1                       | 2.967418000  | -1.759032000 | 1.455977000  |
| 1                       | 4.671049000  | -1.886566000 | 0.984161000  |
| 1                       | 4.104080000  | -0.459281000 | 1.872742000  |
| 1                       | 4.580731000  | 0.816202000  | -1.637758000 |
| 1                       | 4.937767000  | 1.142294000  | 0.072234000  |
| 1                       | 5.630236000  | -0.279476000 | -0.730403000 |
| 6                       | 3.235893000  | -1.560326000 | -1.301665000 |
| 1                       | 4.131182000  | -2.170912000 | -1.472041000 |
| 1                       | 2.423233000  | -2.216961000 | -0.981660000 |
| 1                       | 2.955027000  | -1.109557000 | -2.258837000 |

|   |              |              |              |
|---|--------------|--------------|--------------|
| 6 | -0.581686000 | 0.865893000  | 1.611810000  |
| 6 | -0.922415000 | 1.652909000  | 2.502853000  |
| 6 | -1.321849000 | 2.600049000  | 3.557509000  |
| 1 | -0.573686000 | 3.389463000  | 3.701923000  |
| 1 | -2.271080000 | 3.097359000  | 3.322021000  |
| 1 | -1.453236000 | 2.102785000  | 4.526588000  |
| 1 | 0.199592000  | -1.202558000 | -1.402483000 |
| 1 | -0.062037000 | -0.283804000 | -1.625555000 |

A6<sub>X=CCMe</sub>

| -----                   |              |              |              |
|-------------------------|--------------|--------------|--------------|
| Coordinates (Angstroms) |              |              |              |
|                         | X            | Y            | Z            |
| -----                   |              |              |              |
| 25                      | -0.113038000 | -0.458470000 | 0.097475000  |
| 1                       | 0.188762000  | -1.540905000 | -1.220622000 |
| 7                       | -0.437469000 | 1.025976000  | -1.455386000 |
| 1                       | -0.315252000 | 0.500563000  | -2.316717000 |
| 6                       | 0.095159000  | -1.692433000 | 1.298566000  |
| 8                       | 0.225541000  | -2.529558000 | 2.132036000  |
| 6                       | 1.947994000  | 1.547588000  | -1.376432000 |
| 6                       | -1.828135000 | 1.467292000  | -1.369868000 |
| 6                       | 0.538603000  | 2.117918000  | -1.439043000 |
| 1                       | 2.679539000  | 2.358510000  | -1.338779000 |
| 1                       | 2.144561000  | 0.941588000  | -2.266599000 |
| 1                       | 0.451360000  | 2.759395000  | -2.328030000 |
| 1                       | 0.336804000  | 2.731500000  | -0.555890000 |
| 1                       | -2.184632000 | 1.934812000  | -2.297244000 |
| 1                       | -1.889539000 | 2.216000000  | -0.572351000 |
| 6                       | -2.711422000 | 0.305123000  | -0.995232000 |
| 6                       | -4.061173000 | 0.275443000  | -1.340613000 |
| 1                       | -4.479438000 | 1.086161000  | -1.929278000 |
| 6                       | -2.898864000 | -1.705863000 | 0.116896000  |
| 1                       | -2.395259000 | -2.479576000 | 0.686614000  |
| 6                       | -4.850614000 | -0.789848000 | -0.922595000 |
| 1                       | -5.905380000 | -0.832188000 | -1.175936000 |
| 6                       | -4.252872000 | -1.801583000 | -0.174940000 |
| 1                       | -4.818738000 | -2.657702000 | 0.176389000  |
| 7                       | -2.128622000 | -0.678116000 | -0.278867000 |
| 16                      | 2.095215000  | 0.493444000  | 0.112021000  |
| 6                       | 3.589643000  | -0.544181000 | -0.283761000 |
| 6                       | 3.873409000  | -1.307266000 | 1.014561000  |
| 6                       | 4.768559000  | 0.370277000  | -0.627305000 |
| 1                       | 3.014147000  | -1.918901000 | 1.308959000  |
| 1                       | 4.730658000  | -1.974070000 | 0.865935000  |

|   |              |              |              |
|---|--------------|--------------|--------------|
| 1 | 4.110862000  | -0.624458000 | 1.837413000  |
| 1 | 4.620181000  | 0.883335000  | -1.583134000 |
| 1 | 4.933152000  | 1.124616000  | 0.149681000  |
| 1 | 5.681722000  | -0.230992000 | -0.714394000 |
| 6 | 3.332784000  | -1.533647000 | -1.417685000 |
| 1 | 4.249295000  | -2.105737000 | -1.608824000 |
| 1 | 2.532410000  | -2.228538000 | -1.155288000 |
| 1 | 3.053452000  | -1.032154000 | -2.350024000 |
| 6 | -0.574872000 | 0.958164000  | 1.487959000  |
| 6 | -0.894726000 | 1.784414000  | 2.352649000  |
| 6 | -1.267554000 | 2.769743000  | 3.382506000  |
| 1 | -1.980284000 | 3.512582000  | 3.001916000  |
| 1 | -1.737247000 | 2.294281000  | 4.252785000  |
| 1 | -0.395813000 | 3.323122000  | 3.753702000  |

**A7R<sub>x</sub>=CCMe**

| -----                   |              |              |              |
|-------------------------|--------------|--------------|--------------|
| Coordinates (Angstroms) |              |              |              |
|                         | X            | Y            | Z            |
| -----                   |              |              |              |
| 25                      | 0.886321000  | 0.520793000  | 0.498640000  |
| 1                       | 0.170690000  | -1.021980000 | 0.539324000  |
| 7                       | 0.549937000  | 0.448097000  | -1.647709000 |
| 1                       | 0.050164000  | -0.424079000 | -1.807122000 |
| 6                       | 1.088463000  | 0.593298000  | 2.218377000  |
| 8                       | 1.226662000  | 0.677955000  | 3.396957000  |
| 6                       | 2.718113000  | -0.652051000 | -1.891046000 |
| 6                       | -0.345344000 | 1.547578000  | -1.998995000 |
| 6                       | 1.786472000  | 0.421998000  | -2.431779000 |
| 1                       | 3.654271000  | -0.657958000 | -2.455055000 |
| 1                       | 2.246173000  | -1.634301000 | -1.987801000 |
| 1                       | 1.591601000  | 0.224628000  | -3.496342000 |
| 1                       | 2.257771000  | 1.406143000  | -2.349969000 |
| 1                       | -0.854686000 | 1.388072000  | -2.958807000 |
| 1                       | 0.258789000  | 2.457260000  | -2.087953000 |
| 6                       | -1.353968000 | 1.767711000  | -0.902003000 |
| 6                       | -2.562933000 | 2.416267000  | -1.148482000 |
| 1                       | -2.808407000 | 2.716432000  | -2.162764000 |
| 6                       | -1.851120000 | 1.587905000  | 1.341509000  |
| 1                       | -1.535146000 | 1.228906000  | 2.315055000  |
| 6                       | -3.430319000 | 2.670893000  | -0.093740000 |
| 1                       | -4.375253000 | 3.178256000  | -0.261961000 |
| 6                       | -3.065330000 | 2.240343000  | 1.179617000  |
| 1                       | -3.709567000 | 2.396933000  | 2.038156000  |
| 7                       | -0.993352000 | 1.360949000  | 0.331642000  |

|    |              |              |              |
|----|--------------|--------------|--------------|
| 16 | 3.045203000  | -0.312702000 | -0.122370000 |
| 6  | 3.644719000  | -1.965799000 | 0.494532000  |
| 6  | 3.977969000  | -1.720510000 | 1.968928000  |
| 6  | 4.907898000  | -2.355304000 | -0.277879000 |
| 1  | 3.086686000  | -1.421316000 | 2.529092000  |
| 1  | 4.369339000  | -2.642982000 | 2.413572000  |
| 1  | 4.737635000  | -0.939739000 | 2.086298000  |
| 1  | 4.693094000  | -2.552468000 | -1.333508000 |
| 1  | 5.670021000  | -1.570792000 | -0.222003000 |
| 1  | 5.331055000  | -3.272757000 | 0.149427000  |
| 6  | 2.590977000  | -3.066055000 | 0.380328000  |
| 1  | 2.994364000  | -3.991073000 | 0.810979000  |
| 1  | 1.680473000  | -2.795225000 | 0.919229000  |
| 1  | 2.324552000  | -3.278061000 | -0.659951000 |
| 6  | -1.922331000 | -2.203906000 | -1.297456000 |
| 8  | -1.704240000 | -1.532956000 | -2.301315000 |
| 6  | -3.039257000 | -1.828490000 | -0.374991000 |
| 6  | -3.185480000 | -2.411144000 | 0.890010000  |
| 6  | -3.969539000 | -0.873971000 | -0.801534000 |
| 6  | -4.244279000 | -2.038918000 | 1.714827000  |
| 1  | -2.468828000 | -3.144517000 | 1.244273000  |
| 6  | -5.033893000 | -0.512227000 | 0.017111000  |
| 1  | -3.849450000 | -0.421235000 | -1.780142000 |
| 6  | -5.171803000 | -1.093079000 | 1.278219000  |
| 1  | -4.345120000 | -2.488406000 | 2.698007000  |
| 1  | -5.752244000 | 0.227144000  | -0.323777000 |
| 1  | -5.998668000 | -0.806501000 | 1.921674000  |
| 6  | -1.114737000 | -3.439390000 | -1.005278000 |
| 1  | -0.341834000 | -3.553184000 | -1.766791000 |
| 1  | -0.644055000 | -3.370597000 | -0.021148000 |
| 1  | -1.766784000 | -4.320526000 | -1.008201000 |
| 6  | 1.669942000  | 2.382718000  | 0.238678000  |
| 6  | 2.110833000  | 3.532583000  | 0.107310000  |
| 6  | 2.634303000  | 4.899818000  | -0.060124000 |
| 1  | 2.427145000  | 5.299230000  | -1.061289000 |
| 1  | 2.191807000  | 5.599825000  | 0.660005000  |
| 1  | 3.721523000  | 4.943354000  | 0.081908000  |

A7S<sub>X=CCMe</sub>

Coordinates (Angstroms)

|    | X            | Y            | Z           |
|----|--------------|--------------|-------------|
| 25 | -1.008057000 | 0.618035000  | 0.481895000 |
| 1  | 0.360712000  | -0.314682000 | 0.810231000 |

|    |              |              |              |
|----|--------------|--------------|--------------|
| 7  | -0.749457000 | -0.128205000 | -1.536243000 |
| 1  | 0.025801000  | -0.781700000 | -1.459277000 |
| 6  | -1.152087000 | 1.112708000  | 2.135852000  |
| 8  | -1.238121000 | 1.438720000  | 3.277975000  |
| 6  | 0.776862000  | 1.721027000  | -1.959118000 |
| 6  | -1.943444000 | -0.894392000 | -1.879306000 |
| 6  | -0.381076000 | 0.900178000  | -2.508970000 |
| 1  | 1.058700000  | 2.500568000  | -2.671179000 |
| 1  | 1.641717000  | 1.072544000  | -1.785482000 |
| 1  | -0.084499000 | 0.462074000  | -3.473542000 |
| 1  | -1.254998000 | 1.536725000  | -2.680731000 |
| 1  | -1.787911000 | -1.567522000 | -2.732720000 |
| 1  | -2.732492000 | -0.181651000 | -2.144369000 |
| 6  | -2.391404000 | -1.673568000 | -0.670416000 |
| 6  | -3.074123000 | -2.882326000 | -0.785729000 |
| 1  | -3.254427000 | -3.301078000 | -1.771012000 |
| 6  | -2.534984000 | -1.753533000 | 1.629969000  |
| 1  | -2.289181000 | -1.276306000 | 2.572704000  |
| 6  | -3.508398000 | -3.535378000 | 0.362166000  |
| 1  | -4.041487000 | -4.478659000 | 0.294721000  |
| 6  | -3.235064000 | -2.952005000 | 1.597198000  |
| 1  | -3.549818000 | -3.416055000 | 2.525804000  |
| 7  | -2.109853000 | -1.115106000 | 0.526020000  |
| 16 | 0.264456000  | 2.462671000  | -0.367268000 |
| 6  | 1.899749000  | 2.901488000  | 0.409637000  |
| 6  | 1.524402000  | 3.715798000  | 1.652324000  |
| 6  | 2.709736000  | 3.764947000  | -0.561065000 |
| 1  | 0.885630000  | 3.134084000  | 2.324746000  |
| 1  | 2.435572000  | 3.988316000  | 2.197922000  |
| 1  | 0.998658000  | 4.639141000  | 1.385592000  |
| 1  | 3.046119000  | 3.192314000  | -1.431593000 |
| 1  | 2.130943000  | 4.625168000  | -0.914487000 |
| 1  | 3.603359000  | 4.143804000  | -0.050446000 |
| 6  | 2.700315000  | 1.668201000  | 0.823030000  |
| 1  | 3.677177000  | 1.986126000  | 1.209357000  |
| 1  | 2.179857000  | 1.110354000  | 1.604105000  |
| 1  | 2.875477000  | 0.986125000  | -0.014439000 |
| 6  | 1.279257000  | -2.870258000 | -0.397020000 |
| 8  | 0.761087000  | -2.847185000 | -1.508527000 |
| 6  | 2.626004000  | -2.245817000 | -0.189326000 |
| 6  | 3.224637000  | -2.176849000 | 1.073687000  |
| 6  | 3.295622000  | -1.706551000 | -1.294695000 |
| 6  | 4.472317000  | -1.576912000 | 1.227728000  |
| 1  | 2.717292000  | -2.575941000 | 1.945764000  |

|   |              |              |              |
|---|--------------|--------------|--------------|
| 6 | 4.544496000  | -1.113032000 | -1.142185000 |
| 1 | 2.823801000  | -1.756456000 | -2.270871000 |
| 6 | 5.134896000  | -1.046612000 | 0.121021000  |
| 1 | 4.924952000  | -1.518300000 | 2.212857000  |
| 1 | 5.054393000  | -0.695163000 | -2.005123000 |
| 1 | 6.105963000  | -0.575835000 | 0.243850000  |
| 6 | 0.587062000  | -3.539019000 | 0.759132000  |
| 1 | -0.376559000 | -3.927308000 | 0.424787000  |
| 1 | 1.200665000  | -4.359097000 | 1.148431000  |
| 1 | 0.429487000  | -2.821055000 | 1.569330000  |
| 6 | -2.671499000 | 1.627608000  | -0.155155000 |
| 6 | -3.691724000 | 2.235649000  | -0.506940000 |
| 6 | -4.904519000 | 2.955252000  | -0.934972000 |
| 1 | -4.699953000 | 4.012265000  | -1.147121000 |
| 1 | -5.337741000 | 2.524494000  | -1.846909000 |
| 1 | -5.687831000 | 2.930360000  | -0.167067000 |

**TSA7-8R<sub>X</sub>=CCMe**

| -----                   |              |              |              |
|-------------------------|--------------|--------------|--------------|
| Coordinates (Angstroms) |              |              |              |
|                         | X            | Y            | Z            |
| -----                   |              |              |              |
| 25                      | 0.626691000  | 0.481951000  | 0.388815000  |
| 1                       | 0.081824000  | -1.121603000 | 0.007856000  |
| 7                       | 0.493467000  | 0.720457000  | -1.730330000 |
| 1                       | 0.071315000  | -0.170170000 | -2.012759000 |
| 6                       | 0.583138000  | 0.114510000  | 2.082141000  |
| 8                       | 0.511917000  | -0.162192000 | 3.236995000  |
| 6                       | 2.762106000  | -0.164893000 | -1.916518000 |
| 6                       | -0.473209000 | 1.772847000  | -2.027421000 |
| 6                       | 1.773686000  | 0.877346000  | -2.421950000 |
| 1                       | 3.727170000  | -0.041528000 | -2.414600000 |
| 1                       | 2.381917000  | -1.170175000 | -2.122328000 |
| 1                       | 1.663459000  | 0.768776000  | -3.511102000 |
| 1                       | 2.151401000  | 1.885636000  | -2.220403000 |
| 1                       | -0.877636000 | 1.702117000  | -3.046707000 |
| 1                       | 0.035981000  | 2.739509000  | -1.935916000 |
| 6                       | -1.589517000 | 1.737648000  | -1.017447000 |
| 6                       | -2.836608000 | 2.298674000  | -1.286068000 |
| 1                       | -3.032512000 | 2.716783000  | -2.268764000 |
| 6                       | -2.232591000 | 1.212159000  | 1.132844000  |
| 1                       | -1.958269000 | 0.755307000  | 2.076795000  |
| 6                       | -3.801365000 | 2.329697000  | -0.286393000 |
| 1                       | -4.776179000 | 2.771093000  | -0.469595000 |
| 6                       | -3.487389000 | 1.776481000  | 0.952317000  |



|    |              |              |              |
|----|--------------|--------------|--------------|
| 1  | -4.203767000 | 1.767034000  | 1.766622000  |
| 7  | -1.289176000 | 1.189131000  | 0.176425000  |
| 16 | 2.939782000  | 0.054066000  | -0.110097000 |
| 6  | 3.774824000  | -1.518520000 | 0.424141000  |
| 6  | 4.016913000  | -1.327446000 | 1.924970000  |
| 6  | 5.109578000  | -1.663799000 | -0.310757000 |
| 1  | 3.073997000  | -1.190537000 | 2.463210000  |
| 1  | 4.515836000  | -2.216196000 | 2.328474000  |
| 1  | 4.656936000  | -0.460668000 | 2.122783000  |
| 1  | 4.966276000  | -1.825277000 | -1.384221000 |
| 1  | 5.739977000  | -0.778937000 | -0.173737000 |
| 1  | 5.649492000  | -2.532548000 | 0.085110000  |
| 6  | 2.895050000  | -2.742726000 | 0.190574000  |
| 1  | 3.381896000  | -3.629570000 | 0.615066000  |
| 1  | 1.917890000  | -2.614452000 | 0.662368000  |
| 1  | 2.738697000  | -2.931463000 | -0.875660000 |
| 6  | -1.124706000 | -2.168820000 | -1.140892000 |
| 8  | -1.050089000 | -1.637258000 | -2.263718000 |
| 6  | -2.351604000 | -1.924618000 | -0.293975000 |
| 6  | -2.414514000 | -2.257728000 | 1.064055000  |
| 6  | -3.493152000 | -1.418553000 | -0.919718000 |
| 6  | -3.600745000 | -2.099990000 | 1.774956000  |
| 1  | -1.525482000 | -2.612795000 | 1.576479000  |
| 6  | -4.683445000 | -1.262087000 | -0.210413000 |
| 1  | -3.437595000 | -1.155642000 | -1.971486000 |
| 6  | -4.742327000 | -1.607690000 | 1.138177000  |
| 1  | -3.633441000 | -2.352416000 | 2.831124000  |
| 1  | -5.562612000 | -0.865425000 | -0.710457000 |
| 1  | -5.667735000 | -1.484402000 | 1.693591000  |
| 6  | -0.366296000 | -3.453516000 | -0.883918000 |
| 1  | 0.584518000  | -3.431624000 | -1.417294000 |
| 1  | -0.189631000 | -3.655377000 | 0.172926000  |
| 1  | -0.976110000 | -4.272340000 | -1.291076000 |
| 6  | 1.203689000  | 2.411942000  | 0.609768000  |
| 6  | 1.508299000  | 3.603145000  | 0.755913000  |
| 6  | 1.866538000  | 5.021660000  | 0.933234000  |
| 1  | 2.921835000  | 5.210965000  | 0.699945000  |
| 1  | 1.271221000  | 5.677762000  | 0.285530000  |
| 1  | 1.702775000  | 5.358464000  | 1.964786000  |

-----  
**TSA7-8S<sub>x=CCMe</sub>**

-----  
Coordinates (Angstroms)

X

Y

Z  
-----

|    |              |              |              |
|----|--------------|--------------|--------------|
| 25 | -0.880855000 | 0.513250000  | 0.398369000  |
| 1  | 0.387130000  | -0.719177000 | 0.445925000  |
| 7  | -0.889707000 | -0.067105000 | -1.648759000 |
| 1  | -0.263069000 | -0.878969000 | -1.638145000 |
| 6  | -0.803014000 | 0.838218000  | 2.101150000  |
| 8  | -0.763558000 | 1.063588000  | 3.267374000  |
| 6  | 0.942796000  | 1.496167000  | -2.028288000 |
| 6  | -2.218054000 | -0.572361000 | -1.978065000 |
| 6  | -0.353413000 | 0.918905000  | -2.586941000 |
| 1  | 1.352991000  | 2.238972000  | -2.717437000 |
| 1  | 1.681059000  | 0.700672000  | -1.879619000 |
| 1  | -0.156425000 | 0.475590000  | -3.574157000 |
| 1  | -1.096726000 | 1.713578000  | -2.717126000 |
| 1  | -2.225503000 | -1.191749000 | -2.885899000 |
| 1  | -2.880948000 | 0.284535000  | -2.146771000 |
| 6  | -2.744670000 | -1.357496000 | -0.804549000 |
| 6  | -3.691541000 | -2.367991000 | -0.959803000 |
| 1  | -4.027147000 | -2.636342000 | -1.956808000 |
| 6  | -2.766622000 | -1.620521000 | 1.487796000  |
| 1  | -2.361615000 | -1.301584000 | 2.441946000  |
| 6  | -4.196548000 | -3.010156000 | 0.165109000  |
| 1  | -4.940273000 | -3.795031000 | 0.068127000  |
| 6  | -3.726084000 | -2.621023000 | 1.417178000  |
| 1  | -4.088321000 | -3.084569000 | 2.328493000  |
| 7  | -2.271819000 | -0.995786000 | 0.406190000  |
| 16 | 0.544220000  | 2.262923000  | -0.418233000 |
| 6  | 2.203837000  | 2.564669000  | 0.360809000  |
| 6  | 1.900557000  | 3.479301000  | 1.552529000  |
| 6  | 3.126512000  | 3.273896000  | -0.632039000 |
| 1  | 1.188859000  | 3.010512000  | 2.240744000  |
| 1  | 2.827865000  | 3.674438000  | 2.103881000  |
| 1  | 1.486700000  | 4.440212000  | 1.228535000  |
| 1  | 3.405961000  | 2.618155000  | -1.463167000 |
| 1  | 2.663120000  | 4.177717000  | -1.042073000 |
| 1  | 4.049919000  | 3.568805000  | -0.119039000 |
| 6  | 2.837090000  | 1.267630000  | 0.848951000  |
| 1  | 3.807618000  | 1.485517000  | 1.312362000  |
| 1  | 2.199313000  | 0.772895000  | 1.585506000  |
| 1  | 3.004096000  | 0.567037000  | 0.027224000  |
| 6  | 0.921814000  | -2.448824000 | -0.221266000 |
| 8  | 0.440702000  | -2.536475000 | -1.368802000 |
| 6  | 2.388551000  | -2.111804000 | -0.084488000 |
| 6  | 3.055983000  | -2.135980000 | 1.144832000  |
| 6  | 3.117305000  | -1.820296000 | -1.242329000 |

|   |              |              |              |
|---|--------------|--------------|--------------|
| 6 | 4.420959000  | -1.865313000 | 1.214005000  |
| 1 | 2.512508000  | -2.346628000 | 2.060228000  |
| 6 | 4.481522000  | -1.545221000 | -1.175177000 |
| 1 | 2.597725000  | -1.814185000 | -2.195343000 |
| 6 | 5.138874000  | -1.567016000 | 0.055161000  |
| 1 | 4.924034000  | -1.881860000 | 2.176630000  |
| 1 | 5.031979000  | -1.317266000 | -2.083821000 |
| 1 | 6.202658000  | -1.354663000 | 0.112043000  |
| 6 | 0.259807000  | -3.210568000 | 0.907332000  |
| 1 | -0.805924000 | -3.302281000 | 0.695092000  |
| 1 | 0.696818000  | -4.218346000 | 0.937286000  |
| 1 | 0.392105000  | -2.745818000 | 1.884944000  |
| 6 | -2.399103000 | 1.822202000  | 0.100679000  |
| 6 | -3.336566000 | 2.615284000  | -0.057536000 |
| 6 | -4.442066000 | 3.568507000  | -0.258831000 |
| 1 | -4.955647000 | 3.406087000  | -1.215059000 |
| 1 | -5.201673000 | 3.490109000  | 0.529086000  |
| 1 | -4.089345000 | 4.607689000  | -0.258997000 |

**A8R<sub>x</sub>**= CCMc

Coordinates (Angstroms)

|    | X            | Y            | Z            |
|----|--------------|--------------|--------------|
| 25 | -0.951505000 | 0.760287000  | -0.165561000 |
| 1  | 0.652803000  | -1.575708000 | -0.986738000 |
| 7  | -0.304747000 | 0.156218000  | 1.574245000  |
| 1  | 0.248870000  | -1.452378000 | 1.130871000  |
| 6  | -1.109744000 | 0.538169000  | -1.886991000 |
| 8  | -1.127549000 | 0.330662000  | -3.056806000 |
| 6  | -2.335041000 | -1.072526000 | 2.082835000  |
| 6  | 0.899503000  | 0.780771000  | 2.066735000  |
| 6  | -1.208561000 | -0.215957000 | 2.646682000  |
| 1  | -3.141733000 | -1.207741000 | 2.807330000  |
| 1  | -1.942398000 | -2.052126000 | 1.798608000  |
| 1  | -0.699995000 | -0.806184000 | 3.431319000  |
| 1  | -1.627027000 | 0.674162000  | 3.151471000  |
| 1  | 1.574802000  | 0.077178000  | 2.589324000  |
| 1  | 0.673704000  | 1.578612000  | 2.799597000  |
| 6  | 1.640790000  | 1.414355000  | 0.924663000  |
| 6  | 2.943654000  | 1.898021000  | 1.051363000  |
| 1  | 3.463943000  | 1.782918000  | 1.997187000  |
| 6  | 1.544380000  | 2.118885000  | -1.274512000 |
| 1  | 0.950268000  | 2.185862000  | -2.179498000 |
| 6  | 3.548181000  | 2.518798000  | -0.031169000 |

|    |              |              |              |
|----|--------------|--------------|--------------|
| 1  | 4.561019000  | 2.902291000  | 0.045779000  |
| 6  | 2.829112000  | 2.634168000  | -1.221315000 |
| 1  | 3.256819000  | 3.108514000  | -2.097919000 |
| 7  | 0.952183000  | 1.514208000  | -0.227913000 |
| 16 | -2.972006000 | -0.250501000 | 0.574992000  |
| 6  | -3.596874000 | -1.690387000 | -0.426650000 |
| 6  | -4.338006000 | -1.060181000 | -1.608925000 |
| 6  | -4.567996000 | -2.517585000 | 0.419556000  |
| 1  | -3.681701000 | -0.403792000 | -2.188262000 |
| 1  | -4.697157000 | -1.852802000 | -2.275831000 |
| 1  | -5.204042000 | -0.478729000 | -1.274818000 |
| 1  | -4.061924000 | -3.019478000 | 1.250314000  |
| 1  | -5.372260000 | -1.896647000 | 0.828214000  |
| 1  | -5.022385000 | -3.293102000 | -0.208656000 |
| 6  | -2.440884000 | -2.559324000 | -0.925135000 |
| 1  | -2.845018000 | -3.428846000 | -1.458295000 |
| 1  | -1.799514000 | -1.999552000 | -1.610257000 |
| 1  | -1.814595000 | -2.924088000 | -0.105722000 |
| 6  | 1.223759000  | -2.264807000 | -0.341212000 |
| 8  | 0.590516000  | -2.368137000 | 0.911153000  |
| 6  | 2.641688000  | -1.717809000 | -0.223834000 |
| 6  | 3.260425000  | -1.115318000 | -1.323933000 |
| 6  | 3.360985000  | -1.839463000 | 0.967235000  |
| 6  | 4.572821000  | -0.653241000 | -1.239474000 |
| 1  | 2.705380000  | -0.997748000 | -2.252452000 |
| 6  | 4.674038000  | -1.376141000 | 1.057150000  |
| 1  | 2.876879000  | -2.290443000 | 1.828176000  |
| 6  | 5.286376000  | -0.783897000 | -0.047031000 |
| 1  | 5.034432000  | -0.179140000 | -2.101328000 |
| 1  | 5.216889000  | -1.474549000 | 1.993503000  |
| 1  | 6.305993000  | -0.415552000 | 0.023598000  |
| 6  | 1.228511000  | -3.643017000 | -0.996316000 |
| 1  | 0.202681000  | -4.006200000 | -1.115736000 |
| 1  | 1.701827000  | -3.605007000 | -1.982693000 |
| 1  | 1.782266000  | -4.355892000 | -0.374492000 |
| 6  | -1.740382000 | 2.574659000  | -0.109035000 |
| 6  | -2.185417000 | 3.721722000  | 0.019194000  |
| 6  | -2.725938000 | 5.082421000  | 0.178217000  |
| 1  | -1.936395000 | 5.842923000  | 0.136568000  |
| 1  | -3.451023000 | 5.329331000  | -0.607268000 |
| 1  | -3.239752000 | 5.207672000  | 1.139574000  |

---

-----  
Coordinates (Angstroms)

|    | X            | Y            | Z            |
|----|--------------|--------------|--------------|
| 25 | 1.210302000  | 0.465111000  | -0.211614000 |
| 1  | -0.899598000 | -1.109882000 | -0.380632000 |
| 7  | 1.064028000  | -0.062806000 | 1.681026000  |
| 1  | -0.403730000 | -0.974882000 | 1.623145000  |
| 6  | 0.665286000  | 0.521364000  | -1.866639000 |
| 8  | 0.263040000  | 0.493479000  | -2.983425000 |
| 6  | -0.230350000 | 1.895949000  | 2.263412000  |
| 6  | 1.965852000  | -1.112780000 | 2.094604000  |
| 6  | 0.826419000  | 0.905400000  | 2.731786000  |
| 1  | -0.331560000 | 2.736184000  | 2.954666000  |
| 1  | -1.194378000 | 1.387513000  | 2.170791000  |
| 1  | 0.456810000  | 0.429964000  | 3.659035000  |
| 1  | 1.751330000  | 1.446231000  | 3.007408000  |
| 1  | 1.563195000  | -1.740844000 | 2.910382000  |
| 1  | 2.922593000  | -0.703323000 | 2.473156000  |
| 6  | 2.271925000  | -1.983420000 | 0.909698000  |
| 6  | 2.789427000  | -3.273999000 | 1.029014000  |
| 1  | 2.974310000  | -3.685767000 | 2.016311000  |
| 6  | 2.268806000  | -2.148394000 | -1.396336000 |
| 1  | 2.047437000  | -1.662648000 | -2.340378000 |
| 6  | 3.052766000  | -4.011453000 | -0.117174000 |
| 1  | 3.454628000  | -5.017601000 | -0.046970000 |
| 6  | 2.786897000  | -3.433503000 | -1.358573000 |
| 1  | 2.973762000  | -3.966204000 | -2.284684000 |
| 7  | 2.007053000  | -1.429648000 | -0.289644000 |
| 16 | 0.275457000  | 2.491045000  | 0.609334000  |
| 6  | -1.336316000 | 3.059051000  | -0.128242000 |
| 6  | -0.949077000 | 3.758119000  | -1.434609000 |
| 6  | -2.011055000 | 4.050103000  | 0.822461000  |
| 1  | -0.405176000 | 3.082822000  | -2.102241000 |
| 1  | -1.857100000 | 4.089963000  | -1.951220000 |
| 1  | -0.323850000 | 4.637593000  | -1.246701000 |
| 1  | -2.338496000 | 3.566093000  | 1.748026000  |
| 1  | -1.342010000 | 4.877681000  | 1.080995000  |
| 1  | -2.900195000 | 4.469612000  | 0.336806000  |
| 6  | -2.255719000 | 1.872960000  | -0.413749000 |
| 1  | -3.189398000 | 2.232096000  | -0.864155000 |
| 1  | -1.785261000 | 1.171492000  | -1.106283000 |
| 1  | -2.518172000 | 1.328280000  | 0.498050000  |
| 6  | -1.506618000 | -1.794406000 | 0.238706000  |
| 8  | -1.218079000 | -1.565311000 | 1.596160000  |
| 6  | -2.965462000 | -1.503040000 | -0.070731000 |

|   |              |              |              |
|---|--------------|--------------|--------------|
| 6 | -3.376754000 | -1.352458000 | -1.400451000 |
| 6 | -3.916350000 | -1.373293000 | 0.943085000  |
| 6 | -4.706266000 | -1.076530000 | -1.710764000 |
| 1 | -2.642058000 | -1.432238000 | -2.198842000 |
| 6 | -5.251412000 | -1.100860000 | 0.636424000  |
| 1 | -3.598984000 | -1.472438000 | 1.976260000  |
| 6 | -5.651769000 | -0.949719000 | -0.690631000 |
| 1 | -5.003270000 | -0.950372000 | -2.748387000 |
| 1 | -5.979476000 | -1.001755000 | 1.437300000  |
| 1 | -6.689116000 | -0.731871000 | -0.928449000 |
| 6 | -1.136027000 | -3.228310000 | -0.152703000 |
| 1 | -0.074420000 | -3.405201000 | 0.048718000  |
| 1 | -1.724894000 | -3.945026000 | 0.431496000  |
| 1 | -1.320278000 | -3.412078000 | -1.216899000 |
| 6 | 2.955415000  | 1.314470000  | -0.599178000 |
| 6 | 4.072036000  | 1.811859000  | -0.789260000 |
| 6 | 5.398231000  | 2.412430000  | -1.012312000 |
| 1 | 6.032888000  | 1.776845000  | -1.642440000 |
| 1 | 5.324606000  | 3.386871000  | -1.510826000 |
| 1 | 5.938424000  | 2.572965000  | -0.071021000 |

---
